# Supplementary material
Source: publisher figshare collection journal article supplement (https://rs.figshare.com/ndownloader/files/17427200)
Supplement: Supplementary file 1 [file 17427200]

{
	tree: "((KC529514_1_Rhabdocoela_Dalyellioida_Graffillidae_Pseudograffilla_arenicola:0.14511030283811302000{0},AJ012521_1_Rhabdocoela_Dalyellioida_Graffillidae_Graffila_buccinicola:0.39520343800548529689{1}):0.05212255895169703307{2},((AJ012518_1_Rhabdocoela_Dalyellioida_Pterastericolidae_Pterastericola_australis:0.02740340579254955250{3},KC529516_1_Rhabdocoela_Dalyellioida_Pterastericolidae_Ptera…
	placements: [
	{"p":[[6, -160725.305219, 0.999986, 0.131802, 0.199389]], "n":["BM_OTU71"]},
	{"p":[[434, -160549.704051, 0.258967, 0.001816, 0.003998],[437, -160549.856129, 0.222433, 0.002749, 0.005682],[436, -160550.006478, 0.191383, 0.004397, 0.007421],[435, -160550.007680, 0.191153, 0.000919, 0.007444],[438, -160550.347624, 0.136065, 0.039651, 0.004866]], "n":["BM_OTU74"]},
	{"p":[[754, -160538.373730, 0.155493, 0.000001, 0.000001],[756, -160538.373758, 0.155488, 0.001481, 0.000001],[750, -160538.373812, 0.155480, 0.000001, 0.000001],[751, -160538.373895, 0.155467, 0.000001, 0.000001],[755, -160538.374392, 0.155390, 0.000001, 0.000001],[759, -160538.715027, 0.110531, 0.000001, 0.000001],[760, -160538.747813, 0.106966, 0.025743, 0.000001]], "n":["BM_OTU133"]},
	{"p":[[787, -160540.826063, 1.000000, 0.158383, 0.000001]], "n":["BM_OTU157"]},
	{"p":[[397, -160764.034850, 0.583205, 0.035158, 0.364523],[398, -160766.015192, 0.080495, 0.004247, 0.374035],[399, -160766.026523, 0.079588, 0.000001, 0.373051],[400, -160766.026804, 0.079566, 0.017371, 0.373067],[396, -160766.085905, 0.075000, 0.000001, 0.378009],[430, -160766.735788, 0.039158, 0.017287, 0.406416],[781, -160767.415921, 0.019835, 0.000001, 0.430218]], "n":["BM_OTU259"]},
	{"p":[[42, -160670.178352, 0.273415, 0.008858, 0.139112],[43, -160670.222744, 0.261543, 0.023499, 0.138896],[41, -160670.343797, 0.231723, 0.000001, 0.139907],[44, -160671.016929, 0.118204, 0.002369, 0.141965],[45, -160671.049861, 0.114375, 0.040526, 0.142546]], "n":["BM_OTU271"]},
	{"p":[[6, -160704.021508, 0.999996, 0.126269, 0.156806]], "n":["BM_OTU272"]},
	{"p":[[44, -160652.709313, 0.344007, 0.017692, 0.118852],[43, -160653.117004, 0.228828, 0.006322, 0.123621],[45, -160653.127325, 0.226478, 0.040525, 0.124505],[42, -160653.923448, 0.102159, 0.000001, 0.123686],[41, -160653.973667, 0.097155, 0.001668, 0.122821]], "n":["BM_OTU295"]},
	{"p":[[46, -160693.775804, 0.803764, 0.036160, 0.200926],[901, -160695.889168, 0.097120, 0.000001, 0.220616],[902, -160695.947148, 0.091649, 0.061536, 0.221633]], "n":["BM_OTU337"]},
	{"p":[[45, -160651.665808, 0.342306, 0.029064, 0.101568],[44, -160651.719069, 0.324552, 0.013523, 0.103673],[43, -160652.494954, 0.149390, 0.005921, 0.107402],[42, -160652.554428, 0.140764, 0.019969, 0.111191],[41, -160653.947919, 0.034939, 0.000001, 0.114605],[46, -160656.087746, 0.004111, 0.102129, 0.108627],[38, -160656.130764, 0.003938, 0.000001, 0.111436]], "n":["BM_OTU402"]},
	{"p":[[45, -160613.840532, 0.590627, 0.015943, 0.043702],[46, -160614.652133, 0.262325, 0.088303, 0.039078],[38, -160615.286340, 0.139125, 0.000001, 0.045455]], "n":["BM_OTU440"]},
	{"p":[[457, -160538.371629, 0.941381, 0.008155, 0.000001],[456, -160541.755584, 0.031925, 0.000001, 0.000002],[458, -160541.934633, 0.026691, 0.018168, 0.000001]], "n":["BM_OTU472"]},
	{"p":[[400, -160724.240464, 0.172477, 0.005807, 0.302659],[423, -160724.412937, 0.145153, 0.000001, 0.303355],[424, -160724.413014, 0.145142, 0.034961, 0.303350],[398, -160724.746381, 0.103995, 0.000001, 0.312617],[399, -160724.747593, 0.103869, 0.000001, 0.312586],[396, -160724.978486, 0.082454, 0.000001, 0.317198],[397, -160724.979680, 0.082356, 0.000001, 0.317220]], "n":["BM_OTU509"]},
	{"p":[[35, -160701.994511, 0.384701, 0.038948, 0.169326],[36, -160702.186999, 0.317342, 0.015311, 0.180386],[38, -160702.513989, 0.228832, 0.023832, 0.173953],[37, -160703.926464, 0.055730, 0.000001, 0.183997],[46, -160705.916031, 0.007621, 0.071678, 0.151766]], "n":["BM_OTU536"]},
	{"p":[[902, -160731.793015, 0.648904, 0.028767, 0.279653],[903, -160733.588706, 0.107726, 0.120440, 0.291406],[25, -160733.624608, 0.103927, 0.000001, 0.291959],[901, -160734.355109, 0.050058, 0.000001, 0.294885],[46, -160734.359453, 0.049841, 0.000001, 0.294999],[11, -160735.570948, 0.014840, 0.006762, 0.296922],[24, -160735.775711, 0.012093, 0.000001, 0.303478]], "n":["BM_OTU640"]},
	{"p":[[0, -160650.248525, 0.938030, 0.022411, 0.064755],[1, -160653.490394, 0.036668, 0.014788, 0.061549],[2, -160653.861800, 0.025292, 0.051874, 0.070487]], "n":["BM_OTU761"]},
	{"p":[[5, -160623.467933, 0.990464, 0.085049, 0.056747]], "n":["BM_OTU783"]},
	{"p":[[30, -160692.672253, 0.181855, 0.008074, 0.228423],[28, -160692.694763, 0.177807, 0.000001, 0.229087],[29, -160692.703572, 0.176248, 0.000417, 0.228961],[33, -160693.137787, 0.114168, 0.004159, 0.227783],[34, -160693.193512, 0.107980, 0.008704, 0.231235],[27, -160693.327722, 0.094419, 0.000001, 0.233896],[26, -160693.329273, 0.094273, 0.000001, 0.233920]], "n":["BM_OTU790"]},
	{"p":[[451, -160541.898095, 0.762048, 0.019757, 0.000001],[447, -160543.971857, 0.095798, 0.002807, 0.000001],[448, -160544.641286, 0.049049, 0.000001, 0.000684],[450, -160544.757009, 0.043689, 0.000001, 0.001899],[449, -160544.768904, 0.043172, 0.000001, 0.001985]], "n":["BM_OTU806"]},
	{"p":[[400, -160662.170054, 0.266189, 0.004409, 0.151471],[424, -160662.274119, 0.239881, 0.034962, 0.151479],[423, -160662.274715, 0.239738, 0.000001, 0.151490],[398, -160663.350703, 0.081741, 0.000001, 0.158589],[399, -160663.350807, 0.081733, 0.000001, 0.158599],[397, -160663.992804, 0.043011, 0.000001, 0.163955],[396, -160663.993985, 0.042960, 0.000001, 0.163971]], "n":["BM_OTU997"]},
	{"p":[[1, -160713.728366, 1.000000, 0.258305, 0.182817]], "n":["BM_OTU1156"]},
	{"p":[[902, -160729.327534, 0.464845, 0.048947, 0.280093],[901, -160729.923051, 0.256259, 0.000001, 0.285882],[46, -160729.927226, 0.255191, 0.000001, 0.286022]], "n":["BM_OTU1583"]},
	{"p":[[745, -160541.319930, 0.997548, 0.009062, 0.000001]], "n":["BM_OTU1813"]},
	{"p":[[464, -160629.699589, 0.685136, 0.024560, 0.057735],[465, -160631.329214, 0.134289, 0.008973, 0.073628],[431, -160631.642238, 0.098196, 0.006951, 0.063752],[497, -160632.273686, 0.052223, 0.013983, 0.083758],[496, -160632.829226, 0.029964, 0.000001, 0.086227]], "n":["BM_OTU2028"]},
	{"p":[[440, -160556.505880, 0.999750, 0.022612, 0.002999]], "n":["BM_OTU2236"]},
	{"p":[[414, -160553.499356, 1.000000, 0.107085, 0.000001]], "n":["BM_OTU3102"]},
	{"p":[[6, -160669.379135, 1.000000, 0.142799, 0.079206]], "n":["BM_OTU3777"]},
	{"p":[[811, -160542.610164, 0.333901, 0.000084, 0.000001],[813, -160542.610609, 0.333753, 0.092242, 0.000001],[812, -160542.614834, 0.332346, 0.002852, 0.000001]], "n":["BM_OTU5014"]},
	{"p":[[457, -160573.956166, 0.917312, 0.008155, 0.019100],[456, -160577.002631, 0.043597, 0.000001, 0.020303],[458, -160577.113985, 0.039003, 0.018167, 0.020489]], "n":["BM_OTU6002"]},
	{"p":[[395, -160731.947612, 0.235150, 0.006141, 0.307823],[425, -160732.083893, 0.205191, 0.017722, 0.311992],[424, -160732.102289, 0.201451, 0.000001, 0.312969],[398, -160733.290965, 0.061367, 0.013913, 0.320243],[396, -160733.292729, 0.061259, 0.000001, 0.320253],[397, -160733.292819, 0.061253, 0.000001, 0.320258],[400, -160733.865285, 0.034555, 0.015180, 0.321863]], "n":["BM_OTU7549"]},
	{"p":[[411, -160611.918305, 0.597579, 0.032884, 0.058527],[413, -160612.768583, 0.255343, 0.021265, 0.050958],[412, -160613.320433, 0.147048, 0.004698, 0.056894]], "n":["BM_OTU7779"]},
	{"p":[[6, -160718.710215, 0.999986, 0.128066, 0.186687]], "n":["BM_OTU14844"]},
	{"p":[[902, -160766.786039, 0.538120, 0.029178, 0.356688],[903, -160768.356500, 0.111902, 0.120440, 0.370515],[25, -160768.381334, 0.109157, 0.000001, 0.371009],[901, -160768.791511, 0.072429, 0.012859, 0.370134],[46, -160768.923229, 0.063491, 0.000001, 0.373235],[11, -160770.170447, 0.018241, 0.004365, 0.377063],[24, -160770.253358, 0.016790, 0.000001, 0.381565]], "n":["BM_OTU17530"]},
	{"p":[[392, -160585.622647, 0.323150, 0.009697, 0.062244],[393, -160586.271988, 0.168810, 0.000001, 0.068152],[394, -160586.274754, 0.168344, 0.004893, 0.068199],[389, -160586.297911, 0.164490, 0.000001, 0.068573],[395, -160586.305766, 0.163203, 0.032218, 0.068599],[425, -160589.608656, 0.006002, 0.015053, 0.067545],[424, -160589.895759, 0.004504, 0.000001, 0.069619]], "n":["DSF_OTU4383"]},
	{"p":[[393, -160574.173875, 0.644617, 0.016004, 0.032889],[389, -160575.280256, 0.213209, 0.012418, 0.038165],[395, -160576.608790, 0.056472, 0.022963, 0.037537],[392, -160577.094240, 0.034754, 0.013284, 0.033217],[424, -160577.531718, 0.022439, 0.004395, 0.035217],[394, -160578.292955, 0.010481, 0.000001, 0.042340],[425, -160578.368187, 0.009722, 0.018584, 0.043104]], "n":["DSF_OTU4090"]},
	{"p":[[23, -160626.892386, 0.588986, 0.015054, 0.134394],[16, -160627.482215, 0.326547, 0.028248, 0.132250],[24, -160628.978057, 0.073166, 0.036225, 0.138564]], "n":["DSF_OTU4554"]},
	{"p":[[393, -160604.495529, 0.864098, 0.026165, 0.088274],[389, -160606.876483, 0.079896, 0.008720, 0.091784],[395, -160608.359117, 0.018140, 0.032217, 0.098004],[394, -160608.368165, 0.017976, 0.000001, 0.098093],[392, -160608.424008, 0.017000, 0.000001, 0.097949]], "n":["DSF_OTU2144"]},
	{"p":[[389, -160635.042386, 0.406514, 0.016117, 0.105589],[393, -160635.054805, 0.401497, 0.019995, 0.104989],[395, -160636.741297, 0.074344, 0.021479, 0.109681],[392, -160637.656104, 0.029782, 0.008013, 0.108822],[425, -160637.676877, 0.029170, 0.018584, 0.115396],[424, -160637.677349, 0.029156, 0.001199, 0.113120],[394, -160637.751642, 0.027068, 0.000001, 0.113989]], "n":["DSF_OTU3462"]},
	{"p":[[389, -160651.115830, 0.220647, 0.003012, 0.181088],[394, -160651.252078, 0.192543, 0.000001, 0.184293],[395, -160651.252232, 0.192513, 0.032219, 0.184292],[392, -160651.275881, 0.188014, 0.002645, 0.182420],[393, -160651.297115, 0.184063, 0.000001, 0.184259],[425, -160654.197465, 0.010124, 0.016755, 0.192825],[424, -160654.231864, 0.009782, 0.000001, 0.194174]], "n":["DSF_OTU3756"]},
	{"p":[[393, -160651.229110, 0.773843, 0.031601, 0.187971],[389, -160653.210635, 0.106681, 0.010444, 0.190158],[395, -160654.330629, 0.034808, 0.032218, 0.200439],[394, -160654.330681, 0.034806, 0.000001, 0.200444],[392, -160654.392002, 0.032736, 0.000001, 0.200531],[425, -160655.765091, 0.008293, 0.017741, 0.204911],[424, -160655.772301, 0.008233, 0.000001, 0.205568]], "n":["DSF_OTU4518"]},
	{"p":[[393, -160742.972736, 0.410032, 0.029158, 0.279031],[395, -160744.060829, 0.138123, 0.010625, 0.285057],[425, -160744.130468, 0.128831, 0.018584, 0.288700],[424, -160744.138777, 0.127765, 0.000001, 0.288943],[389, -160744.650394, 0.076598, 0.006541, 0.282882],[394, -160744.879751, 0.060899, 0.000001, 0.288778],[392, -160745.009707, 0.053478, 0.000001, 0.289487]], "n":["DSF_OTU5073"]},
	{"p":[[44, -160587.135505, 0.923985, 0.024315, 0.039873],[43, -160590.312895, 0.038525, 0.000382, 0.048565],[45, -160590.344067, 0.037343, 0.040524, 0.049304]], "n":["DSF_OTU3063"]},
	{"p":[[25, -160681.940227, 0.572174, 0.070831, 0.271939],[23, -160683.319971, 0.143984, 0.013192, 0.295340],[11, -160683.403861, 0.132398, 0.014816, 0.272202],[24, -160683.600372, 0.108777, 0.008120, 0.284795],[16, -160684.554196, 0.041908, 0.014050, 0.302509]], "n":["DSF_OTU2970"]},
	{"p":[[23, -160649.483684, 0.443351, 0.030578, 0.199693],[11, -160649.866278, 0.302405, 0.024483, 0.173572],[25, -160650.961862, 0.101107, 0.092845, 0.198734],[24, -160650.983491, 0.098944, 0.000493, 0.198889],[16, -160651.589013, 0.054003, 0.017750, 0.201028]], "n":["DSF_OTU4934"]},
	{"p":[[393, -160601.397191, 0.407038, 0.013836, 0.088398],[392, -160602.185519, 0.185041, 0.007510, 0.088915],[394, -160602.521025, 0.132300, 0.005320, 0.093599],[389, -160602.553319, 0.128096, 0.000001, 0.094091],[395, -160602.560353, 0.127198, 0.032219, 0.094119],[425, -160605.105703, 0.009978, 0.014178, 0.089821],[424, -160605.181915, 0.009246, 0.002136, 0.088460]], "n":["DSF_OTU2457"]},
	{"p":[[392, -160589.691629, 0.311450, 0.009403, 0.066425],[393, -160590.281979, 0.172585, 0.000001, 0.072506],[394, -160590.285448, 0.171987, 0.004539, 0.072583],[389, -160590.302508, 0.169078, 0.000001, 0.072950],[395, -160590.310167, 0.167788, 0.032217, 0.072976]], "n":["DSF_OTU6117"]},
	{"p":[[393, -160605.961503, 0.819932, 0.026683, 0.101504],[389, -160607.905449, 0.117363, 0.011116, 0.104852],[395, -160609.642428, 0.020662, 0.032219, 0.112126],[394, -160609.650143, 0.020503, 0.000001, 0.112211],[392, -160609.707471, 0.019361, 0.000001, 0.112074]], "n":["DSF_OTU1682"]},
	{"p":[[393, -160729.354318, 0.677075, 0.033358, 0.281467],[389, -160731.237291, 0.103008, 0.007456, 0.285443],[395, -160731.722507, 0.063408, 0.032219, 0.293831],[394, -160731.723687, 0.063333, 0.000001, 0.293859],[392, -160731.781444, 0.059779, 0.000001, 0.294014],[424, -160733.096945, 0.016041, 0.000001, 0.305691],[425, -160733.097396, 0.016034, 0.018585, 0.305709]], "n":["DSF_OTU346"]},
	{"p":[[306, -160581.022276, 0.253273, 0.009184, 0.052231],[367, -160581.774835, 0.119332, 0.000001, 0.067525],[368, -160581.785102, 0.118113, 0.009829, 0.067655],[319, -160582.054992, 0.090175, 0.000001, 0.069419],[366, -160582.057129, 0.089983, 0.000001, 0.069444],[326, -160582.521040, 0.056583, 0.010201, 0.068287],[308, -160582.623819, 0.051056, 0.004238, 0.066875]], "n":["DSF_OTU4630"]},
	{"p":[[389, -160693.924211, 0.422988, 0.010675, 0.348138],[395, -160695.231679, 0.114420, 0.032219, 0.361609],[394, -160695.231854, 0.114400, 0.000001, 0.361611],[393, -160695.302108, 0.106639, 0.000001, 0.362131],[392, -160695.303178, 0.106525, 0.000001, 0.362149],[425, -160696.115256, 0.047290, 0.016276, 0.372419],[424, -160696.136393, 0.046301, 0.000001, 0.373068]], "n":["DSF_OTU951"]},
	{"p":[[240, -160654.378032, 0.011061, 0.013658, 9.853525],[239, -160654.378044, 0.011061, 0.038842, 9.853548],[241, -160654.378278, 0.011058, 0.048154, 9.853743],[111, -160655.442588, 0.003815, 0.005752, 11.443157],[21, -160656.171389, 0.001841, 0.038769, 10.997203],[792, -160656.409955, 0.001450, 0.045986, 11.180910],[793, -160656.410061, 0.001450, 0.000007, 11.210567]], "n":["MP_OTU002024"]},
	{"p":[[711, -160583.099424, 0.801078, 0.010030, 0.026241],[723, -160584.511535, 0.195166, 0.038580, 0.029885]], "n":["PA_OTU4067"]},
	{"p":[[833, -160669.478509, 0.866219, 0.065089, 0.229383],[835, -160671.692505, 0.094646, 0.080983, 0.259861],[834, -160672.797655, 0.031343, 0.000001, 0.260989]], "n":["PA_OTU2066"]},
	{"p":[[730, -160563.511371, 0.287610, 0.001047, 0.021502],[731, -160563.539013, 0.279769, 0.008381, 0.021483],[727, -160563.541749, 0.279004, 0.000001, 0.021483],[728, -160565.008099, 0.064385, 0.000001, 0.026214],[729, -160565.014819, 0.063954, 0.001149, 0.026255],[722, -160567.712722, 0.004307, 0.000001, 0.031576],[726, -160567.712820, 0.004307, 0.000001, 0.031576]], "n":["PA_OTU2469"]},
	{"p":[[694, -160629.697324, 0.756631, 0.016403, 0.120049],[692, -160631.367406, 0.142422, 0.010262, 0.139575],[693, -160631.909812, 0.082797, 0.012316, 0.131064],[710, -160634.042831, 0.009810, 0.068282, 0.121602],[709, -160634.248603, 0.007985, 0.000001, 0.127944]], "n":["PA_OTU2518"]},
	{"p":[[711, -160590.245986, 0.179481, 0.002825, 0.060395],[716, -160590.340983, 0.163216, 0.000592, 0.058772],[717, -160590.866782, 0.096474, 0.005281, 0.060522],[715, -160590.927786, 0.090765, 0.000571, 0.062548],[712, -160590.927788, 0.090764, 0.000591, 0.062548],[714, -160590.928333, 0.090715, 0.000001, 0.062552],[713, -160591.008385, 0.083736, 0.034195, 0.062122]], "n":["PA_OTU2658"]},
	{"p":[[721, -160565.127727, 0.449154, 0.001221, 0.021493],[732, -160565.595767, 0.281273, 0.001424, 0.021761],[733, -160565.700255, 0.253367, 0.160597, 0.021711]], "n":["PA_OTU2701"]},
	{"p":[[41, -160615.945161, 0.941451, 0.049908, 0.089259],[43, -160619.809661, 0.019745, 0.011973, 0.111166],[45, -160619.967298, 0.016866, 0.033380, 0.112034],[44, -160620.254861, 0.012651, 0.000001, 0.114144]], "n":["PA_OTU3443"]},
	{"p":[[416, -160745.668361, 0.263670, 0.010379, 0.482767],[421, -160746.031920, 0.183303, 0.010988, 0.504114],[422, -160746.149154, 0.163025, 0.025237, 0.504755],[417, -160746.736115, 0.090644, 0.001604, 0.516212],[420, -160746.744317, 0.089904, 0.000001, 0.518456],[408, -160746.747172, 0.089648, 0.057402, 0.452296],[409, -160747.300844, 0.051533, 0.020146, 0.498634]], "n":["SA_OTU187108"]},
	{"p":[[408, -160729.963775, 0.527740, 0.081049, 0.306445],[409, -160731.800682, 0.084074, 0.019780, 0.371711],[421, -160731.887870, 0.077054, 0.018045, 0.378629],[422, -160731.928206, 0.074008, 0.015274, 0.378153],[407, -160732.277207, 0.052205, 0.000001, 0.374172],[416, -160732.323087, 0.049864, 0.000001, 0.382713],[423, -160732.409890, 0.045718, 0.047963, 0.378939]], "n":["SA_OTU136519"]},
	{"p":[[433, -160681.612406, 0.990389, 0.015850, 0.125604]], "n":["SA_OTU48157"]},
	{"p":[[408, -160712.149618, 0.836571, 0.091224, 0.253402],[416, -160715.161369, 0.041164, 0.012056, 0.311348],[409, -160715.171814, 0.040736, 0.023359, 0.325354],[407, -160715.592440, 0.026749, 0.000001, 0.329885],[422, -160715.834493, 0.020998, 0.011778, 0.331458],[423, -160716.297363, 0.013218, 0.055562, 0.336204],[421, -160716.438600, 0.011477, 0.008538, 0.334714]], "n":["SA_OTU136499"]},
	{"p":[[408, -160660.520820, 0.875228, 0.054314, 0.077378],[409, -160663.109411, 0.065752, 0.019327, 0.121300],[423, -160664.063282, 0.025331, 0.042705, 0.125185],[407, -160664.164139, 0.022901, 0.000001, 0.121421],[422, -160664.957730, 0.010356, 0.000001, 0.130185]], "n":["SA_OTU161457"]},
	{"p":[[781, -160749.783598, 0.231148, 0.000001, 0.308414],[782, -160749.851220, 0.216034, 0.030478, 0.309163],[430, -160749.874293, 0.211107, 0.000001, 0.309361],[500, -160750.175629, 0.156183, 0.030522, 0.304970],[737, -160751.360137, 0.047776, 0.007999, 0.321089],[735, -160751.541921, 0.039835, 0.009672, 0.330862],[497, -160751.874922, 0.028552, 0.000001, 0.335620]], "n":["SA_OTU89698"]},
	{"p":[[781, -160742.155112, 0.306679, 0.000001, 0.295265],[782, -160742.225717, 0.285773, 0.030478, 0.296009],[430, -160742.251313, 0.278551, 0.000001, 0.296202],[423, -160744.487880, 0.029756, 0.010601, 0.274809],[396, -160745.077270, 0.016505, 0.000001, 0.288399],[398, -160745.077353, 0.016503, 0.013914, 0.288394],[397, -160745.077945, 0.016494, 0.000001, 0.288411]], "n":["SA_OTU14774"]},
	{"p":[[423, -160762.731847, 0.766721, 0.026269, 0.304141],[417, -160765.208889, 0.064398, 0.051005, 0.317432],[396, -160766.193416, 0.024060, 0.000001, 0.337088],[398, -160766.193504, 0.024058, 0.013914, 0.337086],[397, -160766.193759, 0.024052, 0.000001, 0.337097],[400, -160766.626558, 0.015602, 0.005208, 0.332390],[424, -160766.756770, 0.013697, 0.034961, 0.333228]], "n":["SA_OTU161181"]},
	{"p":[[433, -160763.290087, 0.890198, 0.015850, 0.252187],[432, -160766.068470, 0.055316, 0.005336, 0.271074],[434, -160766.084323, 0.054446, 0.016066, 0.271157]], "n":["SA_OTU139525"]},
	{"p":[[423, -160761.750047, 0.830672, 0.026219, 0.296872],[396, -160765.283326, 0.024263, 0.000001, 0.329729],[398, -160765.283408, 0.024261, 0.013914, 0.329727],[397, -160765.283691, 0.024254, 0.000001, 0.329738],[400, -160765.704470, 0.015924, 0.005121, 0.324752],[424, -160765.836803, 0.013950, 0.034961, 0.325589],[422, -160766.054571, 0.011220, 0.000001, 0.317609]], "n":["SA_OTU136192"]},
	{"p":[[781, -160750.056536, 0.249781, 0.000001, 0.285861],[782, -160750.129322, 0.232247, 0.030478, 0.286628],[430, -160750.152115, 0.227013, 0.000001, 0.286757],[500, -160751.417743, 0.064032, 0.020371, 0.290485],[737, -160751.511721, 0.058288, 0.007371, 0.295125],[735, -160751.690244, 0.048758, 0.010012, 0.304315],[497, -160752.167652, 0.030249, 0.000001, 0.309808]], "n":["SA_OTU263410"]},
	{"p":[[423, -160760.254644, 0.836717, 0.026259, 0.290397],[396, -160763.866960, 0.022582, 0.000001, 0.323390],[398, -160763.867023, 0.022581, 0.013914, 0.323387],[397, -160763.867344, 0.022574, 0.000001, 0.323399],[400, -160764.276740, 0.014990, 0.005045, 0.318154],[424, -160764.410860, 0.013109, 0.034961, 0.318993],[422, -160764.604666, 0.010799, 0.000001, 0.310908]], "n":["SA_OTU136491"]},
	{"p":[[781, -160730.688710, 0.239464, 0.000001, 0.257760],[430, -160730.777246, 0.219174, 0.002441, 0.255451],[782, -160730.779158, 0.218756, 0.030478, 0.258640],[780, -160731.128829, 0.154205, 0.015507, 0.250873],[416, -160731.864233, 0.073912, 0.021083, 0.234374],[762, -160732.179607, 0.053920, 0.023270, 0.232232],[423, -160733.388294, 0.016100, 0.035276, 0.235746]], "n":["SA_OTU136602"]},
	{"p":[[408, -160711.648938, 0.748921, 0.048999, 0.164791],[409, -160713.455705, 0.122961, 0.024668, 0.205075],[407, -160713.972245, 0.073356, 0.000001, 0.205120],[422, -160715.099619, 0.023759, 0.000001, 0.216634],[423, -160715.099881, 0.023753, 0.055563, 0.216657]], "n":["SA_OTU14356"]},
	{"p":[[781, -160735.295358, 0.254259, 0.000001, 0.267700],[782, -160735.371719, 0.235567, 0.030478, 0.268453],[430, -160735.399206, 0.229180, 0.000001, 0.268595],[500, -160736.442757, 0.080718, 0.027886, 0.264030],[423, -160736.721401, 0.061088, 0.019580, 0.243063],[737, -160737.078827, 0.042729, 0.007099, 0.277903],[735, -160737.462524, 0.029113, 0.009423, 0.287741]], "n":["SA_OTU161427"]},
	{"p":[[423, -160751.997781, 0.598241, 0.015491, 0.244484],[398, -160754.020548, 0.079141, 0.013914, 0.265431],[396, -160754.020798, 0.079121, 0.000001, 0.265441],[397, -160754.021412, 0.079072, 0.000001, 0.265452],[400, -160754.325015, 0.058367, 0.004735, 0.258736],[424, -160754.493000, 0.049342, 0.034962, 0.259532],[399, -160755.091606, 0.027117, 0.000001, 0.270035]], "n":["SA_OTU71695"]},
	{"p":[[781, -160724.973746, 0.217240, 0.000001, 0.259784],[782, -160725.059573, 0.199372, 0.030478, 0.260602],[430, -160725.082642, 0.194825, 0.000001, 0.260683],[500, -160725.436393, 0.136777, 0.032575, 0.249790],[423, -160726.365024, 0.054040, 0.015278, 0.238576],[737, -160726.539270, 0.045398, 0.006940, 0.267818],[735, -160726.803155, 0.034869, 0.010157, 0.276658]], "n":["SA_OTU158258"]},
	{"p":[[408, -160726.652477, 0.353570, 0.026372, 0.179817],[409, -160726.775391, 0.312676, 0.020552, 0.199637],[407, -160727.568088, 0.141524, 0.000001, 0.200789],[423, -160727.850413, 0.106713, 0.047472, 0.204274],[422, -160728.170725, 0.077466, 0.000001, 0.208936],[416, -160730.986110, 0.004639, 0.005436, 0.216712]], "n":["SA_OTU151076"]},
	{"p":[[430, -160714.109721, 0.746562, 0.036150, 0.221038],[780, -160715.725662, 0.148344, 0.014419, 0.247294],[735, -160717.223104, 0.033185, 0.019450, 0.279329],[779, -160717.864989, 0.017465, 0.015525, 0.231501],[737, -160717.974260, 0.015657, 0.004547, 0.269701],[762, -160718.140780, 0.013256, 0.031166, 0.222610],[781, -160718.691064, 0.007646, 0.003606, 0.266794]], "n":["SA_OTU136392"]},
	{"p":[[408, -160666.596406, 0.846147, 0.050265, 0.085932],[409, -160668.886060, 0.085716, 0.019957, 0.127310],[407, -160669.900402, 0.031084, 0.000001, 0.127865],[423, -160670.185312, 0.023378, 0.045922, 0.132264],[422, -160670.757975, 0.013186, 0.000001, 0.136725]], "n":["SA_OTU161174"]},
	{"p":[[408, -160727.791870, 0.385489, 0.028717, 0.176043],[409, -160728.045270, 0.299200, 0.020538, 0.198156],[407, -160728.842877, 0.134761, 0.000001, 0.199271],[423, -160729.125177, 0.101617, 0.047443, 0.202794],[422, -160729.449463, 0.073473, 0.000001, 0.207418]], "n":["SA_OTU48794"]},
	{"p":[[408, -160731.298568, 0.363602, 0.027716, 0.183066],[409, -160731.468380, 0.306817, 0.020437, 0.204179],[407, -160732.261405, 0.138826, 0.000001, 0.205411],[423, -160732.528621, 0.106273, 0.047626, 0.208755],[422, -160732.833905, 0.078314, 0.000001, 0.213354]], "n":["SA_OTU158604"]},
	{"p":[[780, -160722.410891, 0.352665, 0.017148, 0.223734],[779, -160722.453057, 0.338103, 0.019537, 0.205378],[735, -160723.400288, 0.131121, 0.023885, 0.249466],[762, -160723.473434, 0.121872, 0.025165, 0.206787],[737, -160725.346697, 0.018722, 0.005813, 0.247078],[781, -160726.192724, 0.008034, 0.006511, 0.242473],[497, -160726.564857, 0.005538, 0.000001, 0.264585]], "n":["SA_OTU157203"]},
	{"p":[[438, -160686.292576, 0.602084, 0.025705, 0.224405],[437, -160688.022072, 0.106794, 0.000001, 0.243604],[434, -160688.023368, 0.106655, 0.000001, 0.243629],[436, -160688.198183, 0.089549, 0.004421, 0.244965],[435, -160688.198704, 0.089503, 0.000939, 0.244977]], "n":["SA_OTU161337"]},
	{"p":[[408, -160671.595056, 0.859079, 0.050677, 0.093958],[409, -160674.023751, 0.075729, 0.022667, 0.134948],[407, -160674.788432, 0.035251, 0.000001, 0.134574],[423, -160675.380483, 0.019500, 0.044613, 0.140759],[422, -160676.040595, 0.010078, 0.000001, 0.146007]], "n":["SA_OTU161127"]},
	{"p":[[408, -160721.098339, 0.420098, 0.030408, 0.167563],[409, -160721.483873, 0.285703, 0.020664, 0.191200],[407, -160722.286642, 0.128020, 0.000001, 0.192178],[423, -160722.588316, 0.094681, 0.047222, 0.195898],[422, -160722.936274, 0.066857, 0.000001, 0.200528]], "n":["SA_OTU23857"]},
	{"p":[[408, -160718.661751, 0.495881, 0.033001, 0.147888],[409, -160719.324455, 0.255604, 0.021001, 0.174280],[407, -160720.137542, 0.113357, 0.000001, 0.174925],[423, -160720.493669, 0.079394, 0.046718, 0.179260],[422, -160720.901807, 0.052788, 0.000001, 0.183944]], "n":["SA_OTU48561"]},
	{"p":[[423, -160724.106174, 0.457237, 0.014495, 0.226723],[398, -160725.490896, 0.114489, 0.013912, 0.242796],[396, -160725.491208, 0.114453, 0.000001, 0.242808],[397, -160725.491981, 0.114365, 0.000001, 0.242819],[400, -160726.036694, 0.066333, 0.006485, 0.238469],[424, -160726.312490, 0.050344, 0.034961, 0.239236],[399, -160726.623684, 0.036881, 0.000001, 0.246932]], "n":["SA_OTU136195"]},
	{"p":[[423, -160713.061455, 0.782888, 0.034827, 0.187669],[416, -160715.235071, 0.089066, 0.016925, 0.186773],[422, -160715.628356, 0.060105, 0.000001, 0.197158],[409, -160715.636934, 0.059591, 0.000001, 0.197396]], "n":["SA_OTU158239"]},
	{"p":[[433, -160722.673703, 0.914980, 0.015850, 0.193499],[432, -160725.735139, 0.042840, 0.005322, 0.210974],[434, -160725.750828, 0.042173, 0.016066, 0.211012]], "n":["SA_OTU158710"]},
	{"p":[[423, -160707.828007, 0.776860, 0.034976, 0.180852],[416, -160709.885512, 0.099261, 0.017562, 0.178393],[422, -160710.411546, 0.058658, 0.000001, 0.189924],[409, -160710.423309, 0.057972, 0.000001, 0.190199]], "n":["SA_OTU17740"]},
	{"p":[[408, -160664.159283, 0.903721, 0.051481, 0.074245],[409, -160666.970288, 0.054354, 0.021935, 0.117181],[407, -160667.848676, 0.022581, 0.000001, 0.116916],[423, -160668.421435, 0.012735, 0.044937, 0.123127]], "n":["SA_OTU48591"]},
	{"p":[[735, -160717.431787, 0.388317, 0.019713, 0.246141],[430, -160718.464210, 0.138296, 0.009336, 0.223350],[423, -160718.670062, 0.112567, 0.024931, 0.206873],[737, -160718.983878, 0.082247, 0.006487, 0.242042],[781, -160719.023534, 0.079049, 0.000001, 0.234976],[782, -160719.104561, 0.072897, 0.030478, 0.235734],[780, -160719.993915, 0.029955, 0.004483, 0.237696]], "n":["SA_OTU136385"]},
	{"p":[[433, -160729.561346, 0.895944, 0.015850, 0.191376],[432, -160732.399530, 0.052441, 0.005348, 0.206847],[434, -160732.415574, 0.051607, 0.016066, 0.206884]], "n":["SA_OTU100235"]},
	{"p":[[408, -160685.674601, 0.835298, 0.051184, 0.121367],[409, -160687.931729, 0.087415, 0.025761, 0.164461],[407, -160688.442594, 0.052447, 0.000001, 0.163935],[423, -160689.949572, 0.011621, 0.055102, 0.176603],[422, -160689.949620, 0.011620, 0.000001, 0.176759]], "n":["SA_OTU161184"]},
	{"p":[[23, -160685.958703, 0.994536, 0.075754, 0.166591]], "n":["SA_OTU138748"]},
	{"p":[[408, -160689.621375, 0.696838, 0.041083, 0.115239],[409, -160691.087532, 0.160838, 0.021630, 0.149172],[407, -160691.908628, 0.070760, 0.000001, 0.149310],[423, -160692.381710, 0.044089, 0.045928, 0.154677],[422, -160692.897515, 0.026322, 0.000001, 0.159323]], "n":["SA_OTU49224"]},
	{"p":[[408, -160703.865243, 0.568960, 0.036128, 0.136389],[409, -160704.805679, 0.222155, 0.021209, 0.165243],[407, -160705.622953, 0.098111, 0.000001, 0.165705],[423, -160706.016330, 0.066203, 0.046421, 0.170305],[422, -160706.462099, 0.042392, 0.000001, 0.174918]], "n":["SA_OTU2982"]},
	{"p":[[433, -160729.655937, 0.923786, 0.015850, 0.191856],[432, -160732.837899, 0.038341, 0.005179, 0.210190],[434, -160732.850610, 0.037857, 0.016066, 0.210210]], "n":["SA_OTU158477"]},
	{"p":[[423, -160724.404855, 0.370476, 0.010861, 0.206283],[398, -160725.377960, 0.140006, 0.013912, 0.221268],[396, -160725.378350, 0.139951, 0.000001, 0.221282],[397, -160725.379374, 0.139808, 0.000001, 0.221295],[400, -160725.928206, 0.080756, 0.006701, 0.216546],[424, -160726.248915, 0.058600, 0.034962, 0.217108],[399, -160726.563337, 0.042790, 0.000001, 0.224915]], "n":["SA_OTU154951"]},
	{"p":[[423, -160710.879495, 0.933344, 0.024180, 0.192848],[782, -160715.433740, 0.009821, 0.019157, 0.217434]], "n":["SA_OTU260521"]},
	{"p":[[781, -160713.002084, 0.302122, 0.000001, 0.208328],[782, -160713.106329, 0.272214, 0.030478, 0.209177],[430, -160713.136382, 0.264154, 0.000001, 0.209217],[737, -160715.084274, 0.037662, 0.006198, 0.216173],[423, -160715.353469, 0.028773, 0.013765, 0.194280],[500, -160715.391541, 0.027698, 0.021420, 0.210530],[735, -160715.785448, 0.018680, 0.009518, 0.225549]], "n":["SA_OTU48557"]},
	{"p":[[423, -160709.850226, 0.943089, 0.022549, 0.171535],[397, -160714.158686, 0.012689, 0.006121, 0.198894],[398, -160714.254520, 0.011529, 0.013912, 0.201352],[396, -160714.256284, 0.011509, 0.000001, 0.201383]], "n":["SA_OTU158271"]},
	{"p":[[408, -160696.579156, 0.613269, 0.037700, 0.128674],[409, -160697.691862, 0.201562, 0.021368, 0.158954],[407, -160698.511065, 0.088845, 0.000001, 0.159289],[423, -160698.933232, 0.058249, 0.046229, 0.164142],[422, -160699.405494, 0.036324, 0.000001, 0.168737]], "n":["SA_OTU159218"]},
	{"p":[[408, -160673.509601, 0.910275, 0.057750, 0.102393],[409, -160676.440706, 0.048552, 0.026215, 0.151618],[407, -160676.943160, 0.029376, 0.000001, 0.150912]], "n":["SA_OTU159214"]},
	{"p":[[408, -160692.109992, 0.848388, 0.064552, 0.172691],[409, -160694.741149, 0.061080, 0.035146, 0.227659],[407, -160694.852038, 0.054669, 0.000001, 0.227875],[404, -160695.990267, 0.017515, 0.035019, 0.224501]], "n":["SA_OTU161462"]},
	{"p":[[433, -160703.008242, 0.888073, 0.015850, 0.159779],[408, -160705.566047, 0.068803, 0.075103, 0.194346],[409, -160707.610304, 0.008908, 0.019939, 0.252083]], "n":["SA_OTU48710"]},
	{"p":[[408, -160692.814026, 0.667568, 0.039843, 0.120300],[409, -160694.150997, 0.175330, 0.021539, 0.152492],[407, -160694.971867, 0.077154, 0.000001, 0.152697],[423, -160695.426770, 0.048955, 0.046027, 0.157816],[422, -160695.928056, 0.029654, 0.000001, 0.162389]], "n":["SA_OTU161274"]},
	{"p":[[408, -160700.229344, 0.659005, 0.039276, 0.120914],[409, -160701.528645, 0.179725, 0.021531, 0.152611],[407, -160702.348032, 0.079205, 0.000001, 0.152813],[423, -160702.803578, 0.050224, 0.046034, 0.157937],[422, -160703.303535, 0.030464, 0.000001, 0.162508]], "n":["SA_OTU161128"]},
	{"p":[[408, -160689.745402, 0.708503, 0.043009, 0.119550],[409, -160691.276889, 0.153188, 0.021644, 0.154519],[407, -160692.083951, 0.068348, 0.000001, 0.154734],[423, -160692.554657, 0.042687, 0.046065, 0.159902],[422, -160693.048631, 0.026048, 0.000001, 0.164532]], "n":["SA_OTU154684"]},
	{"p":[[408, -160681.192894, 0.876267, 0.043404, 0.102055],[409, -160683.921938, 0.057204, 0.039340, 0.138973],[407, -160683.974293, 0.054286, 0.000001, 0.139172]], "n":["SA_OTU187241"]},
	{"p":[[423, -160695.210238, 0.855093, 0.034578, 0.162337],[422, -160697.982938, 0.053437, 0.000001, 0.171111],[409, -160697.997121, 0.052685, 0.000001, 0.171388],[416, -160698.469423, 0.032852, 0.013105, 0.162028]], "n":["SA_OTU9567"]},
	{"p":[[408, -160687.857449, 0.693157, 0.044065, 0.122261],[409, -160689.328202, 0.159254, 0.020778, 0.158188],[407, -160690.197881, 0.066741, 0.000001, 0.158514],[423, -160690.577688, 0.045651, 0.046545, 0.163609],[422, -160690.987980, 0.030287, 0.002530, 0.167840]], "n":["SA_OTU72850"]},
	{"p":[[423, -160707.109997, 0.271415, 0.009538, 0.187002],[782, -160707.574722, 0.170532, 0.019502, 0.196757],[398, -160708.084264, 0.102451, 0.013912, 0.202000],[396, -160708.084601, 0.102416, 0.000001, 0.202015],[397, -160708.086026, 0.102270, 0.000001, 0.202030],[400, -160708.560633, 0.063625, 0.006382, 0.196705],[781, -160708.816265, 0.049273, 0.000001, 0.205953]], "n":["SA_OTU136523"]},
	{"p":[[733, -160719.073394, 0.999943, 0.096574, 0.176128]], "n":["SA_OTU138211"]},
	{"p":[[433, -160723.598642, 0.904579, 0.015850, 0.198865],[432, -160726.578545, 0.045951, 0.005170, 0.216104],[434, -160726.591195, 0.045373, 0.016066, 0.216127]], "n":["SA_OTU138509"]},
	{"p":[[408, -160677.296583, 0.903916, 0.056237, 0.100176],[409, -160680.168024, 0.051177, 0.021807, 0.147099],[407, -160680.979459, 0.022734, 0.000001, 0.147149],[423, -160681.486739, 0.013689, 0.045853, 0.152626]], "n":["SA_OTU262202"]},
	{"p":[[408, -160681.732763, 0.750879, 0.044352, 0.109855],[409, -160683.463641, 0.133002, 0.021734, 0.146259],[407, -160684.286004, 0.058440, 0.000001, 0.146349],[423, -160684.777239, 0.035758, 0.045809, 0.151747],[422, -160685.309944, 0.020990, 0.000001, 0.156319]], "n":["SA_OTU48188"]},
	{"p":[[408, -160678.325194, 0.505836, 0.036979, 0.112079],[409, -160679.006417, 0.255952, 0.015579, 0.144642],[423, -160679.983175, 0.096374, 0.049516, 0.147375],[422, -160680.232313, 0.075121, 0.000001, 0.150720],[407, -160680.416918, 0.062458, 0.000001, 0.145784]], "n":["SA_OTU97405"]},
	{"p":[[408, -160684.980517, 0.774308, 0.045931, 0.107990],[409, -160686.840856, 0.120498, 0.021861, 0.145925],[407, -160687.654013, 0.053435, 0.000001, 0.145959],[423, -160688.166633, 0.032004, 0.045781, 0.151490],[422, -160688.702612, 0.018725, 0.000001, 0.156069]], "n":["SA_OTU23622"]},
	{"p":[[408, -160691.526014, 0.732778, 0.044503, 0.116579],[409, -160693.175189, 0.140846, 0.021547, 0.152865],[407, -160693.994504, 0.062076, 0.000001, 0.153073],[423, -160694.450410, 0.039348, 0.046036, 0.158199],[422, -160694.950272, 0.023869, 0.000001, 0.162783]], "n":["SA_OTU48593"]},
	{"p":[[408, -160690.720247, 0.684503, 0.040838, 0.120797],[409, -160692.138470, 0.165748, 0.021915, 0.153875],[407, -160692.923446, 0.075603, 0.000001, 0.154006],[423, -160693.439060, 0.045145, 0.046070, 0.159389],[422, -160693.933566, 0.027533, 0.000001, 0.163997]], "n":["SA_OTU264343"]},
	{"p":[[423, -160697.110732, 0.942340, 0.029574, 0.163200],[422, -160700.829356, 0.022868, 0.000001, 0.172831],[409, -160700.864193, 0.022085, 0.000001, 0.173289]], "n":["SA_OTU161465"]},
	{"p":[[423, -160710.529893, 0.329649, 0.011301, 0.187205],[782, -160711.320381, 0.149537, 0.019482, 0.197947],[398, -160711.752813, 0.097039, 0.013912, 0.203061],[396, -160711.753485, 0.096973, 0.000001, 0.203078],[397, -160711.754686, 0.096857, 0.000001, 0.203092],[400, -160712.233349, 0.060014, 0.006370, 0.197761],[424, -160712.561762, 0.043214, 0.034414, 0.198120]], "n":["SA_OTU159402"]},
	{"p":[[423, -160690.565811, 0.869376, 0.034465, 0.156458],[422, -160693.397320, 0.051227, 0.000001, 0.165100],[409, -160693.407016, 0.050733, 0.001703, 0.164463],[416, -160694.484629, 0.017270, 0.012650, 0.159251]], "n":["SA_OTU161303"]},
	{"p":[[408, -160684.851002, 0.905045, 0.050768, 0.101667],[409, -160687.710012, 0.051882, 0.029465, 0.141070],[407, -160688.065785, 0.036350, 0.000001, 0.141219]], "n":["SA_OTU263868"]},
	{"p":[[423, -160707.829337, 0.316971, 0.025041, 0.179608],[781, -160708.738496, 0.127696, 0.000224, 0.205273],[430, -160708.794074, 0.120792, 0.002588, 0.202669],[737, -160708.810928, 0.118773, 0.006035, 0.211449],[782, -160708.831804, 0.116320, 0.030478, 0.206119],[735, -160709.548776, 0.056791, 0.009666, 0.221132],[780, -160709.757149, 0.046108, 0.004775, 0.207028]], "n":["SA_OTU136384"]},
	{"p":[[710, -160755.797251, 0.588475, 0.069085, 0.296767],[693, -160756.501910, 0.290870, 0.037810, 0.300353],[692, -160758.182643, 0.054171, 0.000001, 0.316073],[694, -160758.184200, 0.054087, 0.030888, 0.316121],[709, -160759.664391, 0.012310, 0.000001, 0.316442]], "n":["SA_OTU157031"]},
	{"p":[[408, -160677.698373, 0.785380, 0.042919, 0.103266],[409, -160679.562335, 0.121779, 0.023397, 0.139624],[407, -160680.370322, 0.054283, 0.000001, 0.140183],[423, -160681.366667, 0.020043, 0.049530, 0.146828],[422, -160681.615043, 0.015635, 0.000001, 0.150132]], "n":["SA_OTU75771"]},
	{"p":[[433, -160724.277679, 0.902207, 0.015850, 0.178772],[432, -160727.186321, 0.049215, 0.005192, 0.194079],[434, -160727.199613, 0.048565, 0.016065, 0.194094]], "n":["SA_OTU15553"]},
	{"p":[[433, -160724.568926, 0.904527, 0.015850, 0.176914],[432, -160727.504161, 0.048047, 0.005199, 0.192241],[434, -160727.517400, 0.047415, 0.016065, 0.192254]], "n":["SA_OTU138693"]},
	{"p":[[433, -160713.292980, 0.905332, 0.015850, 0.163706],[432, -160716.237290, 0.047655, 0.005218, 0.178535],[434, -160716.251039, 0.047004, 0.016065, 0.178543]], "n":["SA_OTU139421"]},
	{"p":[[408, -160657.439922, 0.937169, 0.057023, 0.069032],[409, -160660.718367, 0.035319, 0.022641, 0.118418],[407, -160661.530600, 0.015677, 0.000001, 0.117912]], "n":["SA_OTU137128"]},
	{"p":[[22, -160759.132353, 0.731792, 0.013816, 0.248635],[21, -160760.771169, 0.142121, 0.003639, 0.260430],[20, -160760.983210, 0.114966, 0.000001, 0.264576],[23, -160763.694842, 0.007637, 0.079389, 0.240118]], "n":["SA_OTU249515"]},
	{"p":[[408, -160711.976585, 0.557913, 0.035357, 0.137020],[409, -160712.872230, 0.227821, 0.021210, 0.165149],[407, -160713.689119, 0.100652, 0.000001, 0.165603],[423, -160714.082858, 0.067893, 0.046429, 0.170209],[422, -160714.528245, 0.043491, 0.000001, 0.174810]], "n":["SA_OTU161437"]},
	{"p":[[408, -160678.015169, 0.811822, 0.046458, 0.097092],[409, -160680.086107, 0.102344, 0.022037, 0.135848],[407, -160680.906196, 0.045072, 0.000001, 0.135712],[423, -160681.464438, 0.025791, 0.045509, 0.141698],[422, -160682.045869, 0.014419, 0.000001, 0.146259]], "n":["SA_OTU14884"]},
	{"p":[[408, -160679.524082, 0.944950, 0.057740, 0.092033],[409, -160682.984745, 0.029680, 0.022052, 0.140113],[407, -160683.790622, 0.013258, 0.000001, 0.139980]], "n":["SA_OTU4481"]},
	{"p":[[408, -160686.526841, 0.770237, 0.044116, 0.104057],[409, -160688.353546, 0.123964, 0.021898, 0.140151],[407, -160689.174341, 0.054554, 0.000001, 0.140103],[423, -160689.703216, 0.032147, 0.045644, 0.145798],[422, -160690.263159, 0.018364, 0.000001, 0.150320]], "n":["SA_OTU5474"]},
	{"p":[[408, -160685.975136, 0.770143, 0.044108, 0.104052],[409, -160687.801493, 0.123992, 0.021898, 0.140138],[407, -160688.622035, 0.054580, 0.000001, 0.140090],[423, -160689.151260, 0.032151, 0.045643, 0.145785],[422, -160689.711204, 0.018366, 0.000001, 0.150307]], "n":["SA_OTU5070"]},
	{"p":[[408, -160683.762921, 0.924192, 0.055462, 0.099875],[409, -160686.891367, 0.040466, 0.021886, 0.145581],[407, -160687.698104, 0.018061, 0.000001, 0.145563],[423, -160688.219045, 0.010727, 0.045809, 0.151148]], "n":["SA_OTU23084"]},
	{"p":[[408, -160684.857894, 0.771113, 0.044188, 0.103979],[409, -160686.689512, 0.123497, 0.021898, 0.140140],[407, -160687.510339, 0.054347, 0.000001, 0.140092],[423, -160688.039279, 0.032023, 0.045643, 0.145787],[422, -160688.599338, 0.018291, 0.000001, 0.150309]], "n":["SA_OTU7571"]},
	{"p":[[408, -160688.208190, 0.894984, 0.053482, 0.108255],[409, -160691.013717, 0.054124, 0.021632, 0.152241],[407, -160691.825149, 0.024043, 0.000001, 0.152362],[423, -160692.150344, 0.017368, 0.044240, 0.156975],[422, -160692.799808, 0.009072, 0.000001, 0.162211]], "n":["SA_OTU23876"]},
	{"p":[[408, -160683.439070, 0.921710, 0.055641, 0.100211],[409, -160686.557082, 0.040781, 0.021806, 0.146319],[407, -160687.368452, 0.018117, 0.000001, 0.146317],[423, -160687.724132, 0.012694, 0.044059, 0.151227]], "n":["SA_OTU12059"]},
	{"p":[[408, -160680.754497, 0.777081, 0.044750, 0.103539],[409, -160682.620229, 0.120279, 0.021896, 0.140269],[407, -160683.441775, 0.052893, 0.000001, 0.140228],[423, -160683.969344, 0.031209, 0.045642, 0.145917],[422, -160684.529310, 0.017827, 0.000001, 0.150449]], "n":["SA_OTU49304"]},
	{"p":[[423, -160706.331502, 0.487185, 0.012619, 0.180650],[398, -160707.807669, 0.111328, 0.013912, 0.197202],[396, -160707.808440, 0.111242, 0.000001, 0.197220],[397, -160707.809698, 0.111102, 0.000001, 0.197234],[400, -160708.258951, 0.070895, 0.006244, 0.191707],[424, -160708.587538, 0.051040, 0.033969, 0.191926],[399, -160709.054471, 0.031998, 0.000001, 0.200336]], "n":["SA_OTU161206"]},
	{"p":[[408, -160678.092865, 0.832168, 0.048044, 0.095538],[409, -160680.301410, 0.091422, 0.022117, 0.134932],[407, -160681.116479, 0.040464, 0.000001, 0.134781],[423, -160681.690683, 0.022788, 0.045478, 0.140780],[422, -160682.277174, 0.012676, 0.000001, 0.145307]], "n":["SA_OTU10432"]},
	{"p":[[408, -160685.317842, 0.800802, 0.053192, 0.106893],[423, -160687.359750, 0.103929, 0.037378, 0.150398],[409, -160687.956341, 0.057232, 0.021350, 0.147958],[407, -160688.672815, 0.027956, 0.000001, 0.147462],[422, -160689.724885, 0.009763, 0.000001, 0.157700]], "n":["SA_OTU49334"]},
	{"p":[[408, -160684.889736, 0.735655, 0.043115, 0.110925],[409, -160686.540853, 0.141125, 0.021725, 0.146075],[407, -160687.362797, 0.062035, 0.000001, 0.146157],[423, -160687.854165, 0.037952, 0.045816, 0.151553],[422, -160688.386416, 0.022289, 0.000001, 0.156104]], "n":["SA_OTU264045"]},
	{"p":[[408, -160683.093852, 0.773422, 0.044406, 0.103819],[409, -160684.938562, 0.122256, 0.021898, 0.140200],[407, -160685.759883, 0.053774, 0.000001, 0.140156],[423, -160686.287985, 0.031712, 0.045643, 0.145847],[422, -160686.848001, 0.018114, 0.000001, 0.150374]], "n":["SA_OTU52993"]},
	{"p":[[408, -160681.633280, 0.831268, 0.049620, 0.099680],[409, -160683.846071, 0.090936, 0.021898, 0.140818],[407, -160684.665898, 0.040058, 0.000001, 0.140780],[423, -160685.193015, 0.023647, 0.045662, 0.146476],[422, -160685.750106, 0.013546, 0.000001, 0.151024]], "n":["SA_OTU48581"]},
	{"p":[[408, -160678.578563, 0.781618, 0.045162, 0.103158],[409, -160680.470661, 0.117833, 0.021895, 0.140296],[407, -160681.292227, 0.051816, 0.000001, 0.140259],[423, -160681.819798, 0.030573, 0.045638, 0.145946],[422, -160682.379935, 0.017461, 0.000001, 0.150483]], "n":["SA_OTU161192"]},
	{"p":[[408, -160684.849544, 0.770948, 0.044175, 0.103984],[409, -160686.680280, 0.123580, 0.021898, 0.140133],[407, -160687.500836, 0.054398, 0.000001, 0.140085],[423, -160688.030100, 0.032043, 0.045642, 0.145780],[422, -160688.590119, 0.018303, 0.000001, 0.150302]], "n":["SA_OTU49211"]},
	{"p":[[408, -160676.167900, 0.789087, 0.045825, 0.102561],[409, -160678.104027, 0.113835, 0.021900, 0.140335],[407, -160678.926416, 0.050017, 0.000001, 0.140302],[423, -160679.453365, 0.029530, 0.045635, 0.145987],[422, -160680.014032, 0.016857, 0.000001, 0.150530]], "n":["SA_OTU250932"]},
	{"p":[[433, -160712.610702, 0.918262, 0.015850, 0.175420],[432, -160715.716513, 0.041127, 0.005167, 0.192002],[434, -160715.729445, 0.040599, 0.016065, 0.192013]], "n":["SA_OTU138659"]},
	{"p":[[44, -160559.269288, 0.862174, 0.101979, 0.142519],[45, -160562.624542, 0.030090, 0.040525, 0.172605],[43, -160562.645653, 0.029462, 0.008543, 0.173048],[42, -160562.702436, 0.027835, 0.000001, 0.174415],[41, -160562.702976, 0.027820, 0.000001, 0.174417],[46, -160563.797090, 0.009315, 0.105409, 0.181367],[38, -160563.798392, 0.009303, 0.000001, 0.181385]], "n":["SA_OTU48558"]},
	{"p":[[423, -160699.275869, 0.385803, 0.025097, 0.167532],[781, -160700.448046, 0.119480, 0.000359, 0.192202],[430, -160700.474204, 0.116395, 0.003276, 0.188750],[782, -160700.547970, 0.108118, 0.029822, 0.192629],[737, -160700.578741, 0.104842, 0.005845, 0.198111],[735, -160701.406288, 0.045829, 0.009734, 0.207706],[780, -160701.481475, 0.042509, 0.004994, 0.193454]], "n":["SA_OTU136568"]},
	{"p":[[408, -160680.321469, 0.831831, 0.049662, 0.099597],[409, -160682.538215, 0.090639, 0.021898, 0.140762],[407, -160683.357859, 0.039934, 0.000001, 0.140723],[423, -160683.885542, 0.023560, 0.045659, 0.146420],[422, -160684.442898, 0.013493, 0.000001, 0.150966]], "n":["SA_OTU136225"]},
	{"p":[[408, -160670.191609, 0.838550, 0.046004, 0.093989],[409, -160672.392957, 0.092789, 0.023582, 0.133232],[407, -160673.204614, 0.041210, 0.000001, 0.133669],[423, -160674.252430, 0.014452, 0.049292, 0.140547],[422, -160674.525101, 0.011003, 0.000001, 0.143886]], "n":["SA_OTU83390"]},
	{"p":[[733, -160714.669399, 0.993686, 0.114288, 0.185748]], "n":["SA_OTU276091"]},
	{"p":[[408, -160679.653084, 0.980550, 0.059918, 0.090347],[409, -160684.195582, 0.010440, 0.022013, 0.140410]], "n":["SA_OTU49212"]},
	{"p":[[408, -160697.616996, 0.652417, 0.039134, 0.122010],[409, -160698.889199, 0.182816, 0.021500, 0.153814],[407, -160699.708976, 0.080536, 0.000001, 0.154043],[423, -160700.157475, 0.051429, 0.046073, 0.159151],[422, -160700.651973, 0.031365, 0.000001, 0.163762]], "n":["SA_OTU5876"]},
	{"p":[[408, -160672.847698, 0.963467, 0.094816, 0.154081],[409, -160676.903249, 0.016693, 0.024581, 0.237421],[407, -160677.359672, 0.010576, 0.000001, 0.237889]], "n":["SA_OTU136535"]},
	{"p":[[433, -160715.359829, 0.923154, 0.015850, 0.177214],[432, -160718.532874, 0.038658, 0.005193, 0.194671],[434, -160718.545992, 0.038154, 0.016065, 0.194684]], "n":["SA_OTU138662"]},
	{"p":[[433, -160693.025158, 0.993801, 0.015850, 0.144574]], "n":["SA_OTU48327"]},
	{"p":[[891, -160741.514805, 0.725209, 0.089823, 0.443856],[408, -160743.482081, 0.101411, 0.078780, 0.493606],[403, -160744.816148, 0.026712, 0.068478, 0.526002],[407, -160744.819684, 0.026618, 0.000001, 0.552444],[409, -160744.891196, 0.024781, 0.046496, 0.553269],[401, -160744.955765, 0.023231, 0.000001, 0.526667],[402, -160744.956156, 0.023222, 0.000001, 0.526706]], "n":["SA_OTU136609"]},
	{"p":[[408, -160675.760757, 0.827599, 0.047394, 0.094926],[409, -160677.934953, 0.094098, 0.022093, 0.134100],[407, -160678.755100, 0.041438, 0.000001, 0.133934],[423, -160679.325848, 0.023416, 0.045449, 0.139934],[422, -160679.917220, 0.012963, 0.000001, 0.144434]], "n":["SA_OTU1977"]},
	{"p":[[408, -160677.141406, 0.881832, 0.051005, 0.092657],[409, -160679.758717, 0.064373, 0.022132, 0.134892],[407, -160680.574248, 0.028479, 0.000001, 0.134721],[423, -160681.144422, 0.016103, 0.045446, 0.140719],[422, -160681.734114, 0.008929, 0.000001, 0.145261]], "n":["SA_OTU3174"]},
	{"p":[[408, -160679.905537, 0.815095, 0.048041, 0.101236],[409, -160682.006187, 0.099749, 0.021908, 0.140351],[407, -160682.826699, 0.043910, 0.000001, 0.140309],[423, -160683.355768, 0.025870, 0.045648, 0.146003],[422, -160683.915242, 0.014785, 0.000001, 0.150537]], "n":["SA_OTU11848"]},
	{"p":[[408, -160678.616346, 0.946224, 0.058460, 0.091369],[409, -160682.125000, 0.028327, 0.021991, 0.140226],[407, -160682.935756, 0.012592, 0.000001, 0.140098]], "n":["SA_OTU5875"]},
	{"p":[[408, -160680.354399, 0.815794, 0.048603, 0.100840],[409, -160682.483354, 0.097048, 0.021845, 0.140549],[407, -160683.308924, 0.042506, 0.000001, 0.140515],[423, -160683.671552, 0.029577, 0.043881, 0.145554],[422, -160684.384782, 0.014495, 0.000001, 0.150727]], "n":["SA_OTU9188"]},
	{"p":[[408, -160674.292946, 0.825717, 0.047265, 0.095167],[409, -160676.454422, 0.095085, 0.022087, 0.134262],[407, -160677.274272, 0.041885, 0.000001, 0.134098],[423, -160677.844115, 0.023691, 0.045454, 0.140097],[422, -160678.434443, 0.013128, 0.000001, 0.144602]], "n":["SA_OTU14903"]},
	{"p":[[408, -160684.905509, 0.714063, 0.046673, 0.106215],[409, -160686.767826, 0.110903, 0.021040, 0.144178],[423, -160686.777238, 0.109864, 0.038455, 0.145098],[407, -160687.651467, 0.045833, 0.000001, 0.144416],[422, -160688.553491, 0.018597, 0.000001, 0.153795]], "n":["SA_OTU23625"]},
	{"p":[[408, -160679.440141, 0.784234, 0.045236, 0.102746],[409, -160681.346663, 0.116534, 0.021911, 0.139840],[407, -160682.168552, 0.051228, 0.000001, 0.139793],[423, -160682.698801, 0.030146, 0.045625, 0.145485],[422, -160683.261397, 0.017175, 0.000001, 0.150006]], "n":["SA_OTU136405"]},
	{"p":[[408, -160680.126372, 0.458320, 0.033380, 0.107458],[409, -160680.563697, 0.295966, 0.021966, 0.134204],[407, -160681.398604, 0.128424, 0.000001, 0.134127],[423, -160681.943389, 0.074482, 0.045455, 0.139955],[422, -160682.534054, 0.041260, 0.000001, 0.144451]], "n":["SA_OTU48549"]},
	{"p":[[423, -160702.113217, 0.460333, 0.011229, 0.173715],[398, -160703.485931, 0.116657, 0.013912, 0.189560],[396, -160703.486916, 0.116542, 0.000001, 0.189580],[397, -160703.488249, 0.116387, 0.000001, 0.189593],[400, -160703.904002, 0.076797, 0.006135, 0.183892],[424, -160704.235118, 0.055150, 0.033259, 0.183877],[399, -160704.752582, 0.032871, 0.000001, 0.192503]], "n":["SA_OTU68088"]},
	{"p":[[408, -160681.912151, 0.840221, 0.054845, 0.099287],[423, -160684.227515, 0.082955, 0.037314, 0.144584],[409, -160684.807386, 0.046452, 0.021521, 0.141857],[407, -160685.520269, 0.022772, 0.000001, 0.141233]], "n":["SA_OTU254815"]},
	{"p":[[408, -160664.726136, 0.908694, 0.053375, 0.077714],[409, -160667.608328, 0.050898, 0.022487, 0.122862],[407, -160668.423358, 0.022529, 0.000001, 0.122458],[423, -160669.085290, 0.011621, 0.045095, 0.129127]], "n":["SA_OTU8308"]},
	{"p":[[408, -160676.085702, 0.827434, 0.047357, 0.094919],[409, -160678.258719, 0.094190, 0.022094, 0.134044],[407, -160679.078548, 0.041491, 0.000001, 0.133876],[423, -160679.650020, 0.023430, 0.045447, 0.139877],[422, -160680.241595, 0.012967, 0.000001, 0.144374]], "n":["SA_OTU48513"]},
	{"p":[[408, -160682.268168, 0.777599, 0.044653, 0.103303],[409, -160684.136426, 0.120055, 0.021907, 0.139839],[407, -160684.957204, 0.052835, 0.000001, 0.139788],[423, -160685.488361, 0.031063, 0.045629, 0.145484],[422, -160686.050275, 0.017710, 0.000001, 0.149999]], "n":["SA_OTU159213"]},
	{"p":[[408, -160675.912356, 0.923779, 0.056440, 0.093016],[409, -160679.023716, 0.041145, 0.021948, 0.139949],[407, -160679.841130, 0.018169, 0.000001, 0.139880],[423, -160680.378521, 0.010615, 0.045627, 0.145619]], "n":["SA_OTU161141"]},
	{"p":[[408, -160671.784203, 0.871546, 0.050119, 0.086347],[409, -160674.293134, 0.070905, 0.022297, 0.128087],[407, -160675.110925, 0.031298, 0.000001, 0.127795],[423, -160675.728329, 0.016880, 0.045262, 0.134124],[422, -160676.351535, 0.009052, 0.000001, 0.138590]], "n":["SA_OTU8318"]},
	{"p":[[423, -160710.491507, 0.757138, 0.015886, 0.181032],[400, -160713.386091, 0.041886, 0.004049, 0.194118],[398, -160713.399883, 0.041313, 0.013912, 0.202740],[396, -160713.400717, 0.041278, 0.000001, 0.202759],[397, -160713.401784, 0.041234, 0.000001, 0.202771],[424, -160713.560610, 0.035179, 0.030249, 0.193353],[399, -160714.623209, 0.012156, 0.000001, 0.205908]], "n":["SA_OTU158189"]},
	{"p":[[423, -160705.633047, 0.313057, 0.009861, 0.173627],[782, -160706.292501, 0.161892, 0.019199, 0.182652],[398, -160706.804267, 0.097044, 0.013912, 0.189186],[396, -160706.804810, 0.096991, 0.000001, 0.189204],[397, -160706.806390, 0.096838, 0.000001, 0.189218],[400, -160707.220326, 0.064014, 0.006155, 0.183523],[424, -160707.552399, 0.045926, 0.033053, 0.183442]], "n":["SA_OTU161183"]},
	{"p":[[408, -160673.519194, 0.987769, 0.062829, 0.081393]], "n":["SA_OTU49222"]},
	{"p":[[733, -160706.917314, 0.999974, 0.095851, 0.155176]], "n":["SA_OTU138233"]},
	{"p":[[408, -160664.752918, 0.909857, 0.053463, 0.077469],[409, -160667.648750, 0.050272, 0.022495, 0.122624],[407, -160668.463625, 0.022255, 0.000001, 0.122215],[423, -160669.127748, 0.011455, 0.045087, 0.128886]], "n":["SA_OTU8594"]},
	{"p":[[433, -160704.596908, 0.919991, 0.015850, 0.151306],[432, -160707.725485, 0.040277, 0.005219, 0.166804],[434, -160707.739249, 0.039727, 0.016065, 0.166805]], "n":["SA_OTU139371"]},
	{"p":[[408, -160671.491939, 0.870766, 0.050054, 0.086469],[409, -160673.994105, 0.071322, 0.022294, 0.128174],[407, -160674.811899, 0.031482, 0.000001, 0.127883],[423, -160675.428609, 0.016991, 0.045265, 0.134211],[422, -160676.051284, 0.009116, 0.000001, 0.138681]], "n":["SA_OTU6979"]},
	{"p":[[408, -160677.362257, 0.708867, 0.046251, 0.101112],[409, -160679.149742, 0.118651, 0.020046, 0.138588],[423, -160679.237461, 0.108686, 0.038560, 0.139496],[407, -160680.153651, 0.043479, 0.000001, 0.139256],[422, -160680.946100, 0.019684, 0.000001, 0.148176]], "n":["SA_OTU7018"]},
	{"p":[[408, -160673.648750, 0.916949, 0.053819, 0.083799],[409, -160676.646225, 0.045768, 0.022343, 0.128701],[407, -160677.459478, 0.020294, 0.000001, 0.128402],[423, -160678.077152, 0.010942, 0.045252, 0.134729]], "n":["SA_OTU9699"]},
	{"p":[[408, -160675.851320, 0.886808, 0.057862, 0.090246],[423, -160678.573363, 0.058299, 0.037243, 0.138714],[409, -160679.132161, 0.033341, 0.021716, 0.135674],[407, -160679.839204, 0.016440, 0.000001, 0.134917]], "n":["SA_OTU9539"]},
	{"p":[[408, -160672.221715, 0.924032, 0.057476, 0.086412],[409, -160675.375724, 0.039438, 0.022048, 0.134597],[407, -160676.194403, 0.017393, 0.000001, 0.134399],[423, -160676.469247, 0.013213, 0.042481, 0.139503]], "n":["SA_OTU23082"]},
	{"p":[[408, -160677.935902, 0.934808, 0.059473, 0.087629],[409, -160681.535492, 0.025553, 0.021367, 0.137724],[423, -160681.564383, 0.024825, 0.038322, 0.139054],[407, -160682.404884, 0.010712, 0.000001, 0.137735]], "n":["SA_OTU7019"]},
	{"p":[[408, -160670.762975, 0.552933, 0.037245, 0.098094],[409, -160671.568419, 0.247100, 0.022138, 0.128326],[407, -160672.406927, 0.106835, 0.000001, 0.128156],[423, -160672.988831, 0.059703, 0.045267, 0.134259],[422, -160673.611589, 0.032028, 0.000001, 0.138732]], "n":["SA_OTU23605"]},
	{"p":[[423, -160690.538395, 0.853057, 0.029847, 0.149832],[409, -160692.792564, 0.089537, 0.017425, 0.148984],[422, -160694.304272, 0.019746, 0.000001, 0.158427],[407, -160694.488449, 0.016424, 0.000001, 0.148966],[408, -160694.805843, 0.011958, 0.000001, 0.150835]], "n":["SA_OTU10114"]},
	{"p":[[408, -160684.334774, 0.715904, 0.046785, 0.106045],[409, -160686.206011, 0.110201, 0.021043, 0.144093],[423, -160686.215498, 0.109161, 0.038453, 0.145017],[407, -160687.089750, 0.045539, 0.000001, 0.144330],[422, -160687.992673, 0.018461, 0.000001, 0.153708]], "n":["SA_OTU23077"]},
	{"p":[[423, -160692.683220, 0.946642, 0.023483, 0.155838],[408, -160696.743995, 0.016316, 0.051744, 0.122548]], "n":["SA_OTU159238"]},
	{"p":[[433, -160716.748283, 0.989001, 0.015850, 0.157885]], "n":["SA_OTU138510"]},
	{"p":[[408, -160669.185087, 0.874909, 0.050511, 0.085865],[409, -160671.724102, 0.069069, 0.022301, 0.127962],[407, -160672.541858, 0.030488, 0.000001, 0.127669],[423, -160673.160443, 0.016424, 0.045251, 0.133996],[422, -160673.784615, 0.008799, 0.000001, 0.138463]], "n":["SA_OTU152960"]},
	{"p":[[408, -160674.461137, 0.862707, 0.051051, 0.092232],[409, -160676.904584, 0.074936, 0.022108, 0.134137],[407, -160677.724079, 0.033021, 0.000001, 0.133970],[423, -160678.296273, 0.018633, 0.045453, 0.139974],[422, -160678.887547, 0.010316, 0.000001, 0.144475]], "n":["SA_OTU23083"]},
	{"p":[[408, -160668.342503, 0.928501, 0.057768, 0.079018],[409, -160671.500210, 0.039483, 0.022341, 0.127915],[407, -160672.315219, 0.017476, 0.000001, 0.127602],[423, -160672.940080, 0.009356, 0.045246, 0.133973]], "n":["SA_OTU14898"]},
	{"p":[[408, -160670.941121, 0.965649, 0.061767, 0.081983],[409, -160674.906926, 0.018302, 0.022191, 0.134118]], "n":["SA_OTU15867"]},
	{"p":[[408, -160671.444569, 0.871645, 0.050117, 0.086321],[409, -160673.954364, 0.070852, 0.022298, 0.128050],[407, -160674.771935, 0.031281, 0.000001, 0.127756],[423, -160675.389865, 0.016862, 0.045261, 0.134086],[422, -160676.013231, 0.009041, 0.000001, 0.138551]], "n":["SA_OTU136603"]},
	{"p":[[423, -160695.395366, 0.924730, 0.029730, 0.162708],[422, -160699.087790, 0.023036, 0.000001, 0.172142],[409, -160699.125401, 0.022186, 0.000001, 0.172615],[397, -160699.190704, 0.020784, 0.037235, 0.183871]], "n":["SA_OTU262964"]},
	{"p":[[408, -160752.536006, 0.511830, 0.100679, 0.563964],[404, -160754.316505, 0.086271, 0.036261, 0.650501],[407, -160754.532826, 0.069489, 0.000001, 0.661431],[409, -160754.539006, 0.069061, 0.046496, 0.661541],[403, -160755.182018, 0.036306, 0.025725, 0.659166],[405, -160755.227261, 0.034700, 0.012107, 0.671465],[420, -160755.552180, 0.025074, 0.013899, 0.681714]], "n":["SA_OTU161190"]},
	{"p":[[904, -160652.936707, 0.637689, 0.066314, 0.091000],[7, -160654.574580, 0.123962, 0.017234, 0.079988],[903, -160654.761499, 0.102828, 0.000001, 0.097396],[8, -160654.804938, 0.098457, 0.000001, 0.097776],[6, -160655.794505, 0.036600, 0.002841, 0.090480]], "n":["SA_OTU6168"]},
	{"p":[[408, -160680.179174, 0.778134, 0.049675, 0.096980],[409, -160682.373154, 0.086740, 0.021231, 0.137737],[423, -160682.390622, 0.085238, 0.038323, 0.138977],[407, -160683.257880, 0.035809, 0.000001, 0.137840],[422, -160684.228525, 0.013566, 0.000001, 0.147489]], "n":["SA_OTU161139"]},
	{"p":[[433, -160711.694957, 0.995157, 0.015850, 0.145042]], "n":["SA_OTU139000"]},
	{"p":[[408, -160696.244307, 0.668040, 0.039761, 0.120013],[409, -160697.582854, 0.175178, 0.021547, 0.152049],[407, -160698.402739, 0.077163, 0.000001, 0.152242],[423, -160698.861114, 0.048791, 0.046013, 0.157370],[422, -160699.364142, 0.029504, 0.000001, 0.161926]], "n":["SA_OTU49507"]},
	{"p":[[408, -160665.528482, 0.912399, 0.053674, 0.076957],[409, -160668.454701, 0.048904, 0.022512, 0.122142],[407, -160669.269486, 0.021651, 0.000001, 0.121725],[423, -160669.937844, 0.011097, 0.045072, 0.128399]], "n":["SA_OTU12"]},
	{"p":[[408, -160664.118473, 0.640428, 0.041970, 0.087613],[409, -160665.275638, 0.201335, 0.022352, 0.122183],[407, -160666.113679, 0.087089, 0.000001, 0.121901],[423, -160666.744458, 0.046347, 0.045061, 0.128328],[422, -160667.402700, 0.023997, 0.000001, 0.132773]], "n":["SA_OTU15857"]},
	{"p":[[408, -160677.804774, 0.777846, 0.049732, 0.097075],[409, -160679.997385, 0.086827, 0.021224, 0.137951],[423, -160680.014517, 0.085352, 0.038327, 0.139182],[407, -160680.882012, 0.035848, 0.000001, 0.138058],[422, -160681.850363, 0.013612, 0.000001, 0.147712]], "n":["SA_OTU14907"]},
	{"p":[[408, -160671.612257, 0.911885, 0.059058, 0.083143],[423, -160674.621922, 0.044963, 0.037181, 0.133010],[409, -160675.157133, 0.026328, 0.021908, 0.129649],[407, -160675.855475, 0.013096, 0.000001, 0.128753]], "n":["SA_OTU65548"]},
	{"p":[[423, -160683.691307, 0.952393, 0.029485, 0.144165],[422, -160687.603933, 0.019036, 0.000001, 0.153103],[409, -160687.646881, 0.018236, 0.000001, 0.153575]], "n":["SA_OTU23869"]},
	{"p":[[408, -160671.302457, 0.912020, 0.059146, 0.083143],[423, -160674.313548, 0.044906, 0.037182, 0.133143],[409, -160674.849376, 0.026278, 0.021903, 0.129786],[407, -160675.547900, 0.013069, 0.000001, 0.128893]], "n":["SA_OTU53255"]},
	{"p":[[423, -160695.057018, 0.510208, 0.011676, 0.161545],[398, -160696.656049, 0.103109, 0.013912, 0.178117],[396, -160696.657203, 0.102990, 0.000001, 0.178139],[397, -160696.658691, 0.102837, 0.000001, 0.178153],[400, -160697.010326, 0.072350, 0.005934, 0.172095],[424, -160697.339497, 0.052057, 0.032231, 0.171749],[399, -160697.952573, 0.028198, 0.000001, 0.180813]], "n":["SA_OTU158094"]},
	{"p":[[408, -160667.804443, 0.907689, 0.051888, 0.079320],[409, -160670.676825, 0.051343, 0.023553, 0.122724],[407, -160671.400280, 0.024905, 0.000001, 0.122238],[423, -160672.283859, 0.010293, 0.045388, 0.129695]], "n":["SA_OTU23599"]},
	{"p":[[408, -160667.770208, 0.869129, 0.050006, 0.086749],[409, -160670.258454, 0.072186, 0.022267, 0.128444],[407, -160671.077660, 0.031818, 0.000001, 0.128156],[423, -160671.690604, 0.017238, 0.045285, 0.134481],[422, -160672.310582, 0.009273, 0.000001, 0.138957]], "n":["SA_OTU60574"]},
	{"p":[[408, -160675.863573, 0.799409, 0.050543, 0.096567],[409, -160678.149741, 0.081264, 0.021491, 0.138160],[423, -160678.274358, 0.071743, 0.038415, 0.139203],[407, -160678.998136, 0.034789, 0.000001, 0.138117],[422, -160680.028176, 0.012420, 0.000001, 0.148033]], "n":["SA_OTU23079"]},
	{"p":[[408, -160666.429011, 0.629547, 0.043528, 0.088370],[409, -160667.690200, 0.178361, 0.014705, 0.126368],[423, -160668.274747, 0.099411, 0.045024, 0.127875],[422, -160668.938880, 0.051169, 0.000001, 0.132329],[407, -160669.175196, 0.040399, 0.000001, 0.126249]], "n":["SA_OTU53008"]},
	{"p":[[423, -160683.389297, 0.854179, 0.029836, 0.143920],[409, -160685.636350, 0.090295, 0.017655, 0.142719],[422, -160687.211708, 0.018685, 0.000001, 0.152295],[407, -160687.331177, 0.016581, 0.000001, 0.142534],[408, -160687.662033, 0.011910, 0.000001, 0.144430]], "n":["SA_OTU49263"]},
	{"p":[[408, -160676.144764, 0.848439, 0.052252, 0.089219],[423, -160678.538938, 0.077418, 0.037182, 0.132853],[409, -160679.075768, 0.045259, 0.021884, 0.129506],[407, -160679.776133, 0.022467, 0.000001, 0.128621]], "n":["SA_OTU262170"]},
	{"p":[[433, -160698.360259, 0.994541, 0.015850, 0.144252]], "n":["SA_OTU138450"]},
	{"p":[[408, -160676.118982, 0.847059, 0.052194, 0.089427],[423, -160678.502094, 0.078152, 0.037185, 0.133060],[409, -160679.039845, 0.045646, 0.021877, 0.129720],[407, -160679.740471, 0.022653, 0.000001, 0.128839]], "n":["SA_OTU265454"]},
	{"p":[[433, -160702.237572, 0.993858, 0.015850, 0.141289]], "n":["SA_OTU15604"]},
	{"p":[[433, -160707.731119, 0.952550, 0.015850, 0.141949],[432, -160711.414970, 0.023934, 0.005434, 0.160592],[434, -160711.432630, 0.023515, 0.016065, 0.160608]], "n":["SA_OTU158426"]},
	{"p":[[433, -160702.247830, 0.993868, 0.015850, 0.141228]], "n":["SA_OTU139139"]},
	{"p":[[22, -160720.507650, 0.773117, 0.012961, 0.194792],[20, -160722.347859, 0.122759, 0.004130, 0.204857],[21, -160722.826794, 0.076042, 0.000001, 0.209617],[23, -160724.057929, 0.022201, 0.080271, 0.181325]], "n":["SA_OTU139072"]},
	{"p":[[22, -160715.514300, 0.780680, 0.012837, 0.188320],[20, -160717.403007, 0.118091, 0.004172, 0.198331],[21, -160717.904053, 0.071551, 0.000001, 0.203121],[23, -160718.996196, 0.024005, 0.080226, 0.174815]], "n":["SA_OTU139040"]},
	{"p":[[408, -160657.649352, 0.945109, 0.057917, 0.066880],[409, -160661.067313, 0.030980, 0.022713, 0.116354],[407, -160661.877853, 0.013774, 0.000001, 0.115812]], "n":["SA_OTU4827"]},
	{"p":[[408, -160666.863164, 0.925747, 0.061446, 0.080637],[423, -160670.059307, 0.037881, 0.037171, 0.132929],[409, -160670.594049, 0.022192, 0.021919, 0.129564],[407, -160671.293466, 0.011026, 0.000001, 0.128676]], "n":["SA_OTU277955"]},
	{"p":[[408, -160674.138409, 0.835941, 0.048040, 0.093842],[409, -160676.370916, 0.089662, 0.022114, 0.133471],[407, -160677.191025, 0.039486, 0.000001, 0.133296],[423, -160677.766540, 0.022207, 0.045424, 0.139300],[422, -160678.361715, 0.012247, 0.000001, 0.143780]], "n":["SA_OTU48798"]},
	{"p":[[735, -160684.454594, 0.624633, 0.018348, 0.166579],[737, -160686.050599, 0.126616, 0.006258, 0.164751],[781, -160686.657276, 0.069026, 0.005116, 0.159365],[780, -160687.197048, 0.040234, 0.004398, 0.161356],[497, -160687.335971, 0.035015, 0.002445, 0.178711],[736, -160687.689114, 0.024597, 0.000001, 0.179452],[782, -160687.846406, 0.021017, 0.028362, 0.160463]], "n":["SA_OTU158108"]},
	{"p":[[735, -160687.086677, 0.624229, 0.018341, 0.166627],[737, -160688.680853, 0.126766, 0.006258, 0.164786],[781, -160689.287754, 0.069092, 0.005116, 0.159399],[780, -160689.828282, 0.040242, 0.004391, 0.161401],[497, -160689.965630, 0.035078, 0.002444, 0.178749],[736, -160690.318658, 0.024644, 0.000001, 0.179490],[782, -160690.476814, 0.021039, 0.028369, 0.160502]], "n":["SA_OTU49314"]},
	{"p":[[408, -160670.184007, 0.892634, 0.055075, 0.080747],[423, -160672.984624, 0.054248, 0.037114, 0.127410],[409, -160673.495136, 0.032559, 0.022091, 0.123733],[407, -160674.188157, 0.016281, 0.000001, 0.122721]], "n":["SA_OTU264398"]},
	{"p":[[408, -160665.857861, 0.607282, 0.041091, 0.088766],[409, -160666.874990, 0.219613, 0.022388, 0.122254],[407, -160667.706017, 0.095664, 0.000001, 0.121936],[423, -160668.346586, 0.050414, 0.045074, 0.128423],[422, -160669.002879, 0.026153, 0.000001, 0.132859]], "n":["SA_OTU48547"]},
	{"p":[[433, -160702.278062, 0.957978, 0.015850, 0.135953],[432, -160706.089017, 0.021197, 0.005438, 0.155143],[434, -160706.106773, 0.020824, 0.016065, 0.155157]], "n":["SA_OTU158485"]},
	{"p":[[733, -160674.252949, 0.999989, 0.076410, 0.126892]], "n":["SA_OTU62925"]},
	{"p":[[22, -160726.945545, 0.643622, 0.015137, 0.196146],[20, -160727.932457, 0.239894, 0.005698, 0.200998],[21, -160728.700062, 0.111341, 0.002578, 0.204717]], "n":["SA_OTU130315"]},
	{"p":[[408, -160597.823352, 0.986221, 0.132187, 0.130718]], "n":["SA_OTU12053"]},
	{"p":[[433, -160712.335800, 0.992545, 0.015850, 0.139842]], "n":["SA_OTU138467"]},
	{"p":[[408, -160666.449366, 0.898306, 0.055776, 0.079886],[423, -160669.310991, 0.051361, 0.037109, 0.127178],[409, -160669.820402, 0.030860, 0.022099, 0.123493],[407, -160670.513327, 0.015434, 0.000001, 0.122482]], "n":["SA_OTU265208"]},
	{"p":[[423, -160681.994531, 0.961346, 0.020781, 0.138944]], "n":["SA_OTU161090"]},
	{"p":[[774, -160599.083177, 0.998948, 0.010395, 0.031151]], "n":["SA_OTU233244"]},
	{"p":[[774, -160605.617184, 0.998790, 0.010454, 0.035309]], "n":["SA_OTU233658"]},
	{"p":[[712, -160687.677623, 0.105056, 0.000596, 0.229743],[715, -160687.678141, 0.105001, 0.000001, 0.229745],[716, -160687.679102, 0.104900, 0.000660, 0.229747],[711, -160687.680315, 0.104773, 0.000001, 0.229749],[717, -160687.680403, 0.104764, 0.005282, 0.229752],[714, -160687.835822, 0.089684, 0.000001, 0.230290],[713, -160687.885110, 0.085371, 0.009747, 0.229904]], "n":["SA_OTU100799"]},
	{"p":[[23, -160739.094279, 0.453107, 0.056826, 0.261993],[22, -160740.123301, 0.161921, 0.017116, 0.301486],[20, -160740.494436, 0.111717, 0.007533, 0.302804],[780, -160740.946165, 0.071111, 0.016293, 0.327991],[782, -160741.034700, 0.065086, 0.017056, 0.326720],[21, -160741.201236, 0.055101, 0.000001, 0.310042],[430, -160741.725497, 0.032619, 0.016571, 0.313607]], "n":["SA_OTU136443"]},
	{"p":[[408, -160599.691754, 0.980039, 0.115266, 0.120425]], "n":["SA_OTU159444"]},
	{"p":[[737, -160677.988605, 0.301284, 0.006075, 0.152089],[781, -160678.524764, 0.176249, 0.005061, 0.146722],[735, -160678.909971, 0.119904, 0.009957, 0.159692],[780, -160679.089143, 0.100235, 0.004603, 0.148387],[497, -160679.446026, 0.070150, 0.002386, 0.166183],[782, -160679.725748, 0.053033, 0.027660, 0.147430],[430, -160679.762832, 0.051102, 0.000703, 0.148551]], "n":["SA_OTU22995"]},
	{"p":[[780, -160675.957856, 0.456936, 0.010512, 0.144209],[423, -160676.674826, 0.223090, 0.022920, 0.132029],[735, -160677.449420, 0.102820, 0.019088, 0.161142],[781, -160677.692811, 0.080607, 0.004734, 0.150852],[737, -160677.929392, 0.063625, 0.003537, 0.157088],[782, -160678.738542, 0.028328, 0.026432, 0.150264],[430, -160678.833000, 0.025775, 0.000001, 0.153001]], "n":["SA_OTU15875"]},
	{"p":[[464, -160654.455687, 0.976787, 0.039405, 0.106187],[465, -160658.975075, 0.010643, 0.011875, 0.130964],[431, -160659.047282, 0.009901, 0.000001, 0.130924]], "n":["SA_OTU158697"]},
	{"p":[[733, -160705.751246, 0.999303, 0.119961, 0.159749]], "n":["SA_OTU155263"]},
	{"p":[[408, -160660.707762, 0.822046, 0.060765, 0.062503],[423, -160662.512920, 0.135184, 0.033176, 0.115370],[409, -160663.958621, 0.031847, 0.019606, 0.111417]], "n":["SA_OTU18053"]},
	{"p":[[408, -160658.941039, 0.822803, 0.060825, 0.062425],[423, -160660.751415, 0.134604, 0.033176, 0.115352],[409, -160662.196972, 0.031715, 0.019607, 0.111397]], "n":["SA_OTU65795"]},
	{"p":[[423, -160667.291314, 0.591209, 0.033188, 0.115632],[408, -160668.256412, 0.225219, 0.040416, 0.081511],[409, -160668.755176, 0.136771, 0.019408, 0.111829],[407, -160670.354218, 0.027640, 0.000001, 0.110632],[422, -160670.751752, 0.018573, 0.000001, 0.122379]], "n":["SA_OTU23871"]},
	{"p":[[423, -160669.586006, 0.952363, 0.026420, 0.121040],[408, -160672.895610, 0.034790, 0.050637, 0.084022]], "n":["SA_OTU48755"]},
	{"p":[[774, -160579.430029, 0.999338, 0.010227, 0.019125]], "n":["SA_OTU274409"]},
	{"p":[[781, -160676.381476, 0.247621, 0.004530, 0.141867],[735, -160676.397971, 0.243570, 0.017723, 0.153715],[737, -160676.704893, 0.179196, 0.003631, 0.148555],[780, -160677.082474, 0.122842, 0.004962, 0.143714],[782, -160677.415749, 0.088025, 0.026325, 0.141188],[430, -160677.441315, 0.085804, 0.003891, 0.139383],[497, -160679.317410, 0.013144, 0.002336, 0.165820]], "n":["SA_OTU23040"]},
	{"p":[[737, -160663.551835, 0.324059, 0.005834, 0.128313],[781, -160663.864201, 0.237119, 0.004680, 0.122573],[497, -160664.729173, 0.099842, 0.004738, 0.140020],[430, -160665.045603, 0.072759, 0.003057, 0.121401],[782, -160665.048070, 0.072580, 0.027450, 0.122876],[780, -160665.661504, 0.039301, 0.000001, 0.131386],[465, -160665.693374, 0.038069, 0.006149, 0.147490]], "n":["SA_OTU158753"]},
	{"p":[[23, -160730.627801, 0.937876, 0.072820, 0.197092],[19, -160733.847332, 0.037490, 0.007352, 0.230725],[22, -160735.227667, 0.009429, 0.003473, 0.229059]], "n":["SA_OTU138815"]},
	{"p":[[423, -160669.207972, 0.608798, 0.010147, 0.132065],[400, -160671.129766, 0.089094, 0.003573, 0.139354],[424, -160671.213460, 0.081941, 0.025580, 0.137027],[398, -160671.646598, 0.053136, 0.013912, 0.149531],[396, -160671.648504, 0.053035, 0.000001, 0.149559],[397, -160671.650532, 0.052928, 0.000001, 0.149573],[425, -160672.454540, 0.023687, 0.018584, 0.138320]], "n":["SA_OTU48552"]},
	{"p":[[423, -160667.878393, 0.939584, 0.026462, 0.115812],[408, -160670.842811, 0.048474, 0.051425, 0.077980]], "n":["SA_OTU161154"]},
	{"p":[[423, -160672.742635, 0.553362, 0.010373, 0.133013],[398, -160674.607462, 0.085728, 0.013912, 0.149853],[396, -160674.609006, 0.085596, 0.000001, 0.149879],[397, -160674.611249, 0.085404, 0.000001, 0.149895],[400, -160674.752781, 0.074133, 0.005464, 0.142980],[424, -160674.968835, 0.059729, 0.026083, 0.140574],[399, -160675.969720, 0.021954, 0.000001, 0.151894]], "n":["SA_OTU48568"]},
	{"p":[[423, -160666.400394, 0.344116, 0.023080, 0.115451],[737, -160666.921665, 0.204324, 0.005320, 0.135614],[781, -160667.223681, 0.151062, 0.005051, 0.130142],[780, -160667.734842, 0.090607, 0.005406, 0.130736],[735, -160668.162660, 0.059069, 0.010117, 0.143670],[782, -160668.417259, 0.045792, 0.026426, 0.130181],[430, -160668.511281, 0.041683, 0.000001, 0.132812]], "n":["SA_OTU12905"]},
	{"p":[[735, -160666.535400, 0.456164, 0.018062, 0.137952],[423, -160667.370514, 0.197895, 0.023077, 0.115479],[737, -160667.888453, 0.117896, 0.005323, 0.135632],[781, -160668.191530, 0.087071, 0.005051, 0.130162],[780, -160668.703179, 0.052200, 0.005402, 0.130764],[782, -160669.385178, 0.026392, 0.026431, 0.130204],[430, -160669.478956, 0.024030, 0.000001, 0.132832]], "n":["SA_OTU14871"]},
	{"p":[[423, -160673.866596, 0.825572, 0.017835, 0.126774],[782, -160676.393987, 0.065936, 0.018614, 0.136660],[398, -160677.809928, 0.016003, 0.013912, 0.149965],[396, -160677.811919, 0.015971, 0.000001, 0.149993],[397, -160677.813897, 0.015939, 0.000001, 0.150007],[400, -160677.883990, 0.014860, 0.005120, 0.142594],[781, -160678.052240, 0.012559, 0.000001, 0.144404]], "n":["SA_OTU161129"]},
	{"p":[[423, -160670.548350, 0.640620, 0.017575, 0.121765],[782, -160671.921979, 0.162196, 0.019673, 0.126525],[781, -160672.675450, 0.076351, 0.003681, 0.133161],[430, -160673.716326, 0.026963, 0.001798, 0.133084],[780, -160673.870114, 0.023119, 0.004911, 0.137951],[398, -160674.587350, 0.011285, 0.013912, 0.144685],[396, -160674.589535, 0.011260, 0.000001, 0.144715]], "n":["SA_OTU158212"]},
	{"p":[[423, -160662.874361, 0.970669, 0.023450, 0.113318],[397, -160667.214904, 0.012647, 0.023407, 0.134472]], "n":["SA_OTU49333"]},
	{"p":[[737, -160665.135930, 0.317008, 0.005240, 0.129459],[781, -160665.403874, 0.242495, 0.005051, 0.124020],[780, -160666.006812, 0.132694, 0.005043, 0.125280],[735, -160666.442796, 0.085804, 0.010137, 0.137466],[782, -160666.655592, 0.069357, 0.027264, 0.124654],[430, -160666.713473, 0.065456, 0.000001, 0.126728],[497, -160667.438600, 0.031698, 0.000001, 0.144076]], "n":["SA_OTU158243"]},
	{"p":[[433, -160702.872129, 0.996986, 0.015850, 0.119898]], "n":["SA_OTU139008"]},
	{"p":[[733, -160659.230004, 1.000000, 0.092486, 0.101595]], "n":["SA_OTU39421"]},
	{"p":[[733, -160724.150534, 0.921137, 0.135983, 0.160668],[712, -160728.529729, 0.011547, 0.000610, 0.173675],[715, -160728.531847, 0.011522, 0.000001, 0.173685],[716, -160728.532966, 0.011510, 0.000668, 0.173685],[717, -160728.534792, 0.011489, 0.005282, 0.173692],[711, -160728.534891, 0.011487, 0.000001, 0.173691]], "n":["SA_OTU216730"]},
	{"p":[[408, -160710.704362, 0.865459, 0.080381, 0.231796],[409, -160713.555912, 0.049984, 0.031101, 0.297912],[407, -160713.633457, 0.046255, 0.000001, 0.298152],[423, -160714.575419, 0.018033, 0.040352, 0.304982]], "n":["SA_OTU161148"]},
	{"p":[[425, -160666.247121, 0.443796, 0.014587, 0.121263],[395, -160666.885688, 0.234346, 0.000001, 0.124024],[424, -160666.889523, 0.233449, 0.000503, 0.123970],[423, -160668.477617, 0.047697, 0.010097, 0.124752],[46, -160669.902676, 0.011471, 0.038614, 0.094207],[782, -160670.418895, 0.006845, 0.000001, 0.130319],[783, -160670.420969, 0.006831, 0.018237, 0.130324]], "n":["SA_OTU161114"]},
	{"p":[[20, -160719.590627, 0.725373, 0.011088, 0.204559],[22, -160720.887300, 0.198346, 0.014962, 0.203612],[21, -160721.856798, 0.075227, 0.011393, 0.203619]], "n":["SA_OTU138724"]},
	{"p":[[433, -160683.593228, 0.962420, 0.015850, 0.106023],[432, -160687.516481, 0.019033, 0.005826, 0.124203],[434, -160687.542418, 0.018546, 0.016065, 0.124230]], "n":["SA_OTU158737"]},
	{"p":[[425, -160669.901677, 0.438508, 0.014615, 0.126527],[395, -160670.519091, 0.236504, 0.000001, 0.129309],[424, -160670.522983, 0.235585, 0.000126, 0.129331],[423, -160672.104933, 0.048430, 0.010030, 0.130029],[46, -160673.780950, 0.009062, 0.038901, 0.101378],[782, -160674.005313, 0.007241, 0.000001, 0.135732],[783, -160674.007358, 0.007226, 0.018237, 0.135737]], "n":["SA_OTU161445"]},
	{"p":[[733, -160658.114277, 1.000000, 0.091858, 0.095194]], "n":["SA_OTU47467"]},
	{"p":[[733, -160667.827661, 0.543868, 0.111387, 0.148959],[711, -160669.636710, 0.089091, 0.007691, 0.195352],[712, -160670.147537, 0.053454, 0.000611, 0.199970],[717, -160670.147811, 0.053440, 0.005282, 0.199958],[716, -160670.148452, 0.053406, 0.000624, 0.199966],[715, -160670.149756, 0.053336, 0.000001, 0.199981],[713, -160670.663987, 0.031893, 0.032154, 0.201539]], "n":["SA_OTU139200"]},
	{"p":[[433, -160654.425037, 0.993365, 0.015850, 0.084282]], "n":["SA_OTU139376"]},
	{"p":[[433, -160661.153044, 0.995379, 0.015850, 0.095650]], "n":["SA_OTU7791"]},
	{"p":[[423, -160659.069060, 0.941872, 0.020806, 0.105224],[782, -160662.701034, 0.024926, 0.019229, 0.116433],[781, -160663.603573, 0.010108, 0.003657, 0.123012]], "n":["SA_OTU136380"]},
	{"p":[[433, -160679.994264, 0.998035, 0.015850, 0.103864]], "n":["SA_OTU139418"]},
	{"p":[[20, -160715.535929, 0.744342, 0.011080, 0.199609],[22, -160716.817744, 0.206580, 0.014801, 0.198475],[21, -160718.658565, 0.032782, 0.001698, 0.208212],[23, -160719.371896, 0.016063, 0.067660, 0.176334]], "n":["SA_OTU138790"]},
	{"p":[[425, -160660.643181, 0.448825, 0.014557, 0.115816],[395, -160661.304722, 0.231619, 0.000001, 0.118549],[424, -160661.307820, 0.230902, 0.000904, 0.118411],[423, -160662.902778, 0.046854, 0.010174, 0.119280],[46, -160664.028005, 0.015208, 0.038336, 0.086713],[782, -160664.888197, 0.006434, 0.000001, 0.124702],[783, -160664.890301, 0.006421, 0.018237, 0.124706]], "n":["SA_OTU161435"]},
	{"p":[[433, -160663.100175, 0.997947, 0.015850, 0.093641]], "n":["SA_OTU158546"]},
	{"p":[[733, -160654.639823, 1.000000, 0.079079, 0.085088]], "n":["SA_OTU23675"]},
	{"p":[[733, -160657.795175, 0.999999, 0.091854, 0.095142]], "n":["SA_OTU28930"]},
	{"p":[[20, -160719.566899, 0.541264, 0.008123, 0.198033],[22, -160719.910035, 0.384049, 0.014734, 0.196691],[21, -160721.584322, 0.071987, 0.008955, 0.201949]], "n":["SA_OTU138813"]},
	{"p":[[733, -160652.903281, 1.000000, 0.079058, 0.084877]], "n":["SA_OTU136383"]},
	{"p":[[733, -160656.187039, 1.000000, 0.091821, 0.094926]], "n":["SA_OTU42892"]},
	{"p":[[733, -160647.258918, 1.000000, 0.080547, 0.079844]], "n":["SA_OTU61888"]},
	{"p":[[408, -160704.197960, 0.884579, 0.083629, 0.220511],[409, -160707.302109, 0.039685, 0.031138, 0.290110],[407, -160707.380178, 0.036704, 0.000001, 0.290302],[423, -160708.343981, 0.014000, 0.040233, 0.297357]], "n":["SA_OTU161466"]},
	{"p":[[423, -160651.068825, 0.977040, 0.021276, 0.099322]], "n":["SA_OTU48584"]},
	{"p":[[782, -160659.986627, 0.335152, 0.019132, 0.110689],[423, -160660.116386, 0.294366, 0.010558, 0.110692],[781, -160660.945128, 0.128520, 0.003619, 0.117166],[430, -160662.035477, 0.043195, 0.000001, 0.119150],[780, -160662.242348, 0.035123, 0.005255, 0.121814],[400, -160662.409832, 0.029707, 0.005092, 0.120497],[398, -160662.483956, 0.027585, 0.013912, 0.128010]], "n":["SA_OTU161185"]},
	{"p":[[423, -160656.129895, 0.532516, 0.010822, 0.110305],[782, -160657.287724, 0.167299, 0.017944, 0.114806],[400, -160658.474100, 0.051081, 0.005090, 0.120435],[398, -160658.549530, 0.047369, 0.013912, 0.127951],[396, -160658.552041, 0.047251, 0.000001, 0.127983],[397, -160658.554712, 0.047125, 0.000001, 0.127997],[424, -160658.735298, 0.039339, 0.028100, 0.118751]], "n":["SA_OTU136417"]},
	{"p":[[433, -160674.924131, 0.998211, 0.015850, 0.097092]], "n":["SA_OTU220849"]},
	{"p":[[772, -160565.055951, 1.000000, 0.072350, 0.007004]], "n":["SA_OTU22585"]},
	{"p":[[433, -160659.178271, 0.993443, 0.015850, 0.099148]], "n":["SA_OTU139023"]},
	{"p":[[733, -160648.662452, 1.000000, 0.088000, 0.084027]], "n":["SA_OTU33637"]},
	{"p":[[733, -160650.527201, 1.000000, 0.083009, 0.082938]], "n":["SA_OTU36701"]},
	{"p":[[433, -160666.504211, 0.967686, 0.015850, 0.090632],[432, -160670.583591, 0.016371, 0.005848, 0.108924],[434, -160670.610131, 0.015942, 0.016065, 0.108943]], "n":["SA_OTU161395"]},
	{"p":[[733, -160641.211174, 1.000000, 0.079768, 0.072918]], "n":["SA_OTU27141"]},
	{"p":[[433, -160665.609599, 0.802256, 0.015850, 0.116422],[434, -160667.284346, 0.150307, 0.010539, 0.117933],[438, -160668.980839, 0.027555, 0.031748, 0.122697],[432, -160669.647767, 0.014144, 0.000001, 0.125906]], "n":["SA_OTU139176"]},
	{"p":[[709, -160655.955387, 0.465304, 0.013128, 0.120664],[692, -160656.794475, 0.201060, 0.022453, 0.143613],[694, -160656.956858, 0.170924, 0.009760, 0.130820],[710, -160657.306252, 0.120521, 0.085890, 0.127847],[693, -160658.355883, 0.042191, 0.008718, 0.143047]], "n":["SA_OTU68627"]},
	{"p":[[433, -160672.731607, 0.998589, 0.015850, 0.092020]], "n":["SA_OTU139091"]},
	{"p":[[433, -160664.388648, 0.992705, 0.015850, 0.102238]], "n":["SA_OTU139247"]},
	{"p":[[423, -160643.191116, 0.985201, 0.021203, 0.094620]], "n":["SA_OTU158260"]},
	{"p":[[733, -160638.298043, 0.999987, 0.079745, 0.054084]], "n":["SA_OTU138186"]},
	{"p":[[733, -160663.214686, 0.999985, 0.104840, 0.094146]], "n":["SA_OTU276576"]},
	{"p":[[734, -160680.607416, 0.693955, 0.043811, 0.175521],[735, -160682.076610, 0.159687, 0.053688, 0.204801],[691, -160682.324402, 0.124639, 0.000001, 0.208330]], "n":["SA_OTU22294"]},
	{"p":[[22, -160691.251382, 0.880109, 0.011772, 0.130483],[20, -160693.670445, 0.078334, 0.004528, 0.139671],[21, -160694.428419, 0.036709, 0.000001, 0.144584]], "n":["SA_OTU139113"]},
	{"p":[[433, -160678.719004, 0.997990, 0.015850, 0.090260]], "n":["SA_OTU139120"]},
	{"p":[[733, -160652.045885, 0.999925, 0.076544, 0.074079]], "n":["SA_OTU135880"]},
	{"p":[[433, -160650.302932, 0.933211, 0.015849, 0.095230],[434, -160653.135068, 0.054954, 0.012701, 0.101124],[432, -160654.801734, 0.010379, 0.000001, 0.105503]], "n":["SA_OTU138652"]},
	{"p":[[692, -160645.999908, 0.530047, 0.022693, 0.128308],[709, -160646.929092, 0.209303, 0.013361, 0.108586],[694, -160647.526807, 0.115130, 0.016183, 0.120372],[693, -160647.658857, 0.100889, 0.009376, 0.127071],[710, -160648.474430, 0.044632, 0.087061, 0.116385]], "n":["SA_OTU137857"]},
	{"p":[[433, -160655.514125, 0.998590, 0.015850, 0.074463]], "n":["SA_OTU138519"]},
	{"p":[[433, -160662.344788, 0.997706, 0.015850, 0.081851]], "n":["SA_OTU138522"]},
	{"p":[[733, -160639.776402, 1.000000, 0.087369, 0.059914]], "n":["SA_OTU160854"]},
	{"p":[[733, -160673.944271, 0.999690, 0.118769, 0.105419]], "n":["SA_OTU156196"]},
	{"p":[[733, -160654.711114, 1.000000, 0.094927, 0.078969]], "n":["SA_OTU278396"]},
	{"p":[[735, -160684.613391, 0.543924, 0.019629, 0.214547],[780, -160685.402348, 0.247115, 0.011852, 0.204402],[737, -160686.785411, 0.061979, 0.007900, 0.220160],[736, -160687.185320, 0.041549, 0.000001, 0.228755],[497, -160687.193006, 0.041231, 0.000001, 0.228707],[500, -160687.505525, 0.030165, 0.000001, 0.228619],[781, -160688.555675, 0.010554, 0.011284, 0.218126]], "n":["SA_OTU22498"]},
	{"p":[[22, -160687.693136, 0.888833, 0.011652, 0.124228],[20, -160690.186767, 0.073426, 0.004569, 0.133297],[21, -160690.982027, 0.033149, 0.000001, 0.138200]], "n":["SA_OTU139044"]},
	{"p":[[850, -160608.988218, 0.310677, 0.003854, 0.050882],[856, -160609.105722, 0.276235, 0.010287, 0.052646],[855, -160609.116208, 0.273353, 0.000001, 0.052761],[858, -160610.234846, 0.089311, 0.027913, 0.052654],[849, -160611.588691, 0.023064, 0.000001, 0.057930],[857, -160611.592911, 0.022967, 0.010796, 0.057977],[844, -160613.350177, 0.003962, 0.000001, 0.059061]], "n":["SA_OTU134293"]},
	{"p":[[433, -160639.328724, 0.996991, 0.015850, 0.067692]], "n":["SA_OTU7163"]},
	{"p":[[433, -160642.698716, 0.998338, 0.015850, 0.066937]], "n":["SA_OTU9614"]},
	{"p":[[733, -160630.716307, 0.999994, 0.077437, 0.037556]], "n":["SA_OTU15719"]},
	{"p":[[433, -160642.321643, 0.995571, 0.015850, 0.068637]], "n":["SA_OTU15545"]},
	{"p":[[733, -160627.107860, 0.999996, 0.077003, 0.031230]], "n":["SA_OTU22296"]},
	{"p":[[20, -160695.747812, 0.945601, 0.012331, 0.155221],[22, -160699.030804, 0.035475, 0.016406, 0.157415],[21, -160699.664903, 0.018816, 0.000001, 0.164365]], "n":["SA_OTU138746"]},
	{"p":[[433, -160646.334874, 0.997830, 0.015850, 0.072643]], "n":["SA_OTU158568"]},
	{"p":[[733, -160647.770469, 0.999998, 0.101810, 0.074415]], "n":["SA_OTU232915"]},
	{"p":[[733, -160655.917032, 0.999995, 0.102950, 0.081073]], "n":["SA_OTU276507"]},
	{"p":[[433, -160654.568266, 0.946220, 0.015850, 0.075536],[432, -160658.114763, 0.027275, 0.005943, 0.089723],[434, -160658.143423, 0.026505, 0.016065, 0.089738]], "n":["SA_OTU48742"]},
	{"p":[[22, -160678.392579, 0.904055, 0.011438, 0.112983],[20, -160681.029926, 0.064686, 0.004647, 0.121895],[21, -160681.899198, 0.027120, 0.000001, 0.126825]], "n":["SA_OTU139092"]},
	{"p":[[433, -160651.335787, 0.998947, 0.015850, 0.069191]], "n":["SA_OTU22455"]},
	{"p":[[733, -160646.757298, 0.999998, 0.101755, 0.074163]], "n":["SA_OTU280732"]},
	{"p":[[735, -160686.447748, 0.395210, 0.016717, 0.219446],[780, -160686.582707, 0.345316, 0.012060, 0.204277],[737, -160688.092752, 0.076280, 0.007242, 0.220339],[736, -160688.585720, 0.046593, 0.000001, 0.230323],[497, -160688.596975, 0.046071, 0.000001, 0.230337],[500, -160688.953488, 0.032255, 0.000001, 0.230629],[781, -160689.566204, 0.017478, 0.006195, 0.216017]], "n":["SA_OTU9482"]},
	{"p":[[733, -160642.578815, 0.999999, 0.100566, 0.067510]], "n":["SA_OTU279135"]},
	{"p":[[850, -160594.241498, 0.297555, 0.002222, 0.041211],[856, -160594.281775, 0.285808, 0.010128, 0.041878],[855, -160594.296420, 0.281653, 0.000205, 0.041901],[858, -160595.404325, 0.093016, 0.027812, 0.041573],[849, -160596.977962, 0.019281, 0.000001, 0.047196],[857, -160596.984185, 0.019162, 0.010796, 0.047253],[844, -160598.776682, 0.003191, 0.000001, 0.048042]], "n":["SA_OTU134251"]},
	{"p":[[46, -160695.332119, 0.738678, 0.064896, 0.186795],[44, -160697.149893, 0.119952, 0.047598, 0.190308],[408, -160697.481071, 0.086134, 0.078124, 0.195718],[45, -160698.578513, 0.028745, 0.020385, 0.207900],[43, -160699.534674, 0.011049, 0.000001, 0.212466]], "n":["SA_OTU14902"]},
	{"p":[[46, -160713.891710, 0.701315, 0.072634, 0.206762],[44, -160715.362670, 0.161095, 0.038512, 0.201534],[45, -160716.091156, 0.077751, 0.023914, 0.219444],[43, -160716.621751, 0.045737, 0.000001, 0.221648],[38, -160717.852507, 0.013359, 0.000001, 0.231747]], "n":["SA_OTU161439"]},
	{"p":[[710, -160616.085532, 0.999896, 0.055717, 0.030116]], "n":["SA_OTU208267"]},
	{"p":[[733, -160640.632037, 0.999999, 0.100506, 0.067305]], "n":["SA_OTU278668"]},
	{"p":[[433, -160632.010425, 0.997910, 0.015850, 0.056844]], "n":["SA_OTU139517"]},
	{"p":[[433, -160651.705007, 0.978193, 0.015850, 0.070240],[432, -160656.188467, 0.011048, 0.005861, 0.090075],[434, -160656.214935, 0.010759, 0.016065, 0.090081]], "n":["SA_OTU139273"]},
	{"p":[[733, -160612.677373, 0.994201, 0.128142, 0.039322]], "n":["SA_OTU138560"]},
	{"p":[[733, -160636.373296, 0.999999, 0.099163, 0.060288]], "n":["SA_OTU232625"]},
	{"p":[[19, -160621.720481, 0.333310, 0.011819, 0.068409],[17, -160621.720947, 0.333155, 0.000001, 0.068410],[18, -160621.721083, 0.333110, 0.000001, 0.068413]], "n":["SA_OTU15613"]},
	{"p":[[733, -160658.602679, 0.886951, 0.139350, 0.081342],[724, -160661.467625, 0.050544, 0.009456, 0.104789],[721, -160662.651285, 0.015474, 0.000516, 0.101999],[732, -160662.658282, 0.015366, 0.000001, 0.102030],[717, -160663.160830, 0.009297, 0.000001, 0.105144],[720, -160663.160919, 0.009296, 0.000001, 0.105144]], "n":["SA_OTU52542"]},
	{"p":[[44, -160692.253558, 0.807105, 0.051457, 0.178274],[46, -160694.272316, 0.107200, 0.066835, 0.186409],[43, -160695.183672, 0.043092, 0.000001, 0.201737],[45, -160695.274845, 0.039337, 0.039368, 0.202651]], "n":["SA_OTU22994"]},
	{"p":[[710, -160607.565354, 0.999453, 0.061946, 0.029573]], "n":["SA_OTU139338"]},
	{"p":[[433, -160626.316452, 0.998420, 0.015850, 0.051516]], "n":["SA_OTU51799"]},
	{"p":[[433, -160644.340878, 0.962962, 0.015850, 0.064738],[432, -160648.278216, 0.018778, 0.005928, 0.080708],[434, -160648.306144, 0.018261, 0.016065, 0.080714]], "n":["SA_OTU139350"]},
	{"p":[[733, -160639.197133, 1.000000, 0.100466, 0.060185]], "n":["SA_OTU139345"]},
	{"p":[[433, -160632.808473, 0.871548, 0.015850, 0.067831],[432, -160635.412793, 0.064454, 0.004849, 0.076794],[434, -160635.419899, 0.063998, 0.016065, 0.076768]], "n":["SA_OTU51818"]},
	{"p":[[41, -160605.286939, 0.618239, 0.012852, 0.038420],[43, -160606.647729, 0.158552, 0.026492, 0.048691],[42, -160606.696092, 0.151067, 0.000001, 0.048541],[45, -160608.111276, 0.036691, 0.040526, 0.052484],[44, -160608.145677, 0.035450, 0.000001, 0.052609]], "n":["SA_OTU48556"]},
	{"p":[[43, -160607.909584, 0.284181, 0.013380, 0.041660],[45, -160608.193346, 0.213973, 0.037538, 0.040418],[44, -160608.232066, 0.205847, 0.000001, 0.041608],[42, -160608.552002, 0.149485, 0.000001, 0.043953],[41, -160608.572262, 0.146487, 0.000001, 0.043790]], "n":["SA_OTU2185"]},
	{"p":[[43, -160609.289757, 0.285202, 0.013400, 0.041651],[45, -160609.592440, 0.210717, 0.037840, 0.040599],[44, -160609.613178, 0.206392, 0.000001, 0.041603],[42, -160609.930013, 0.150346, 0.000001, 0.043929],[41, -160609.950289, 0.147329, 0.000001, 0.043765]], "n":["SA_OTU276155"]},
	{"p":[[433, -160615.172281, 0.998952, 0.015850, 0.041565]], "n":["SA_OTU14909"]},
	{"p":[[433, -160631.901741, 0.977353, 0.015850, 0.053508],[432, -160636.345852, 0.011481, 0.005925, 0.072022],[434, -160636.373776, 0.011165, 0.016065, 0.072022]], "n":["SA_OTU138505"]},
	{"p":[[433, -160642.097001, 0.998807, 0.015850, 0.057839]], "n":["SA_OTU139515"]},
	{"p":[[733, -160638.257298, 0.941557, 0.135729, 0.070533],[724, -160641.843839, 0.026075, 0.009490, 0.097405]], "n":["SA_OTU52532"]},
	{"p":[[433, -160638.234399, 0.931404, 0.015850, 0.059767],[432, -160641.520941, 0.034819, 0.006011, 0.071791],[434, -160641.551293, 0.033778, 0.016065, 0.071799]], "n":["SA_OTU158734"]},
	{"p":[[22, -160639.337690, 0.843986, 0.013162, 0.081477],[23, -160641.212505, 0.129453, 0.087363, 0.075445],[19, -160643.144098, 0.018760, 0.001439, 0.088691]], "n":["SA_OTU6647"]},
	{"p":[[433, -160617.366879, 0.997767, 0.015850, 0.042362]], "n":["SA_OTU139358"]},
	{"p":[[733, -160642.087007, 0.968512, 0.133999, 0.074406]], "n":["SA_OTU52530"]},
	{"p":[[710, -160706.198675, 0.945912, 0.064320, 0.177230],[693, -160709.316201, 0.041872, 0.038930, 0.196588]], "n":["SA_OTU156965"]},
	{"p":[[433, -160609.574457, 0.995640, 0.015850, 0.049631]], "n":["SA_OTU10898"]},
	{"p":[[433, -160611.496680, 0.995627, 0.015850, 0.049491]], "n":["SA_OTU158472"]},
	{"p":[[433, -160619.734165, 0.998948, 0.015850, 0.041468]], "n":["SA_OTU139315"]},
	{"p":[[433, -160631.087141, 0.957123, 0.015850, 0.053399],[432, -160634.870953, 0.021761, 0.005996, 0.067851],[434, -160634.901060, 0.021116, 0.016065, 0.067856]], "n":["SA_OTU48275"]},
	{"p":[[433, -160622.837544, 0.998947, 0.015850, 0.041943]], "n":["SA_OTU139021"]},
	{"p":[[433, -160624.483696, 0.998922, 0.015850, 0.045763]], "n":["SA_OTU139272"]},
	{"p":[[733, -160636.355831, 0.963324, 0.135609, 0.058914],[724, -160640.440309, 0.016215, 0.009505, 0.085715]], "n":["SA_OTU10828"]},
	{"p":[[433, -160624.006478, 0.998921, 0.015850, 0.045949]], "n":["SA_OTU139342"]},
	{"p":[[733, -160644.795425, 0.937869, 0.137012, 0.066473],[724, -160648.208046, 0.030907, 0.010607, 0.091149]], "n":["SA_OTU137787"]},
	{"p":[[733, -160639.045779, 1.000000, 0.107697, 0.052406]], "n":["SA_OTU139065"]},
	{"p":[[733, -160631.068080, 0.972891, 0.136172, 0.063956]], "n":["SA_OTU138182"]},
	{"p":[[44, -160686.730959, 0.959735, 0.055203, 0.157797],[46, -160690.428022, 0.023798, 0.066545, 0.168839]], "n":["SA_OTU161429"]},
	{"p":[[22, -160660.606538, 0.934738, 0.007794, 0.087754],[19, -160663.758712, 0.039969, 0.007630, 0.096579],[20, -160664.852850, 0.013383, 0.007269, 0.094819]], "n":["SA_OTU139144"]},
	{"p":[[733, -160629.150303, 0.983383, 0.133510, 0.058637]], "n":["SA_OTU138219"]},
	{"p":[[733, -160634.911124, 0.970049, 0.134050, 0.057866],[724, -160639.204861, 0.013245, 0.009507, 0.085793]], "n":["SA_OTU137780"]},
	{"p":[[22, -160635.940265, 0.497456, 0.011271, 0.060292],[20, -160636.036480, 0.451824, 0.009543, 0.066183],[23, -160638.325458, 0.045801, 0.079119, 0.051603]], "n":["SA_OTU52003"]},
	{"p":[[20, -160630.996098, 0.975878, 0.013117, 0.062477],[22, -160634.716181, 0.023647, 0.012329, 0.062427]], "n":["SA_OTU139049"]},
	{"p":[[733, -160628.421016, 0.974978, 0.134452, 0.053178],[724, -160632.903095, 0.011027, 0.009514, 0.081047]], "n":["SA_OTU12748"]},
	{"p":[[433, -160622.808281, 0.932187, 0.015850, 0.047501],[432, -160626.106819, 0.034432, 0.006023, 0.059023],[434, -160626.137847, 0.033380, 0.016065, 0.059026]], "n":["SA_OTU48246"]},
	{"p":[[733, -160630.348184, 0.960170, 0.136868, 0.055809],[724, -160634.227557, 0.019841, 0.010667, 0.080545]], "n":["SA_OTU137822"]},
	{"p":[[22, -160633.909884, 0.497886, 0.011269, 0.060189],[20, -160634.008120, 0.451301, 0.009541, 0.066074],[23, -160636.293606, 0.045908, 0.079122, 0.051522]], "n":["SA_OTU139045"]},
	{"p":[[733, -160623.257519, 0.986672, 0.133904, 0.052999]], "n":["SA_OTU52548"]},
	{"p":[[772, -160543.937757, 1.000000, 0.093728, 0.012988]], "n":["SA_OTU50975"]},
	{"p":[[723, -160624.404725, 0.360720, 0.027690, 0.073589],[732, -160625.566419, 0.112889, 0.000001, 0.078032],[721, -160625.571069, 0.112366, 0.000001, 0.078040],[733, -160625.571371, 0.112332, 0.160597, 0.078048],[724, -160625.924759, 0.078891, 0.005169, 0.081488],[720, -160626.132523, 0.064091, 0.003848, 0.084427],[718, -160626.132757, 0.064076, 0.000001, 0.084428]], "n":["SA_OTU54260"]},
	{"p":[[733, -160648.438612, 0.999557, 0.128861, 0.060674]], "n":["SA_OTU186597"]},
	{"p":[[22, -160671.586565, 0.922656, 0.009085, 0.112642],[20, -160674.733791, 0.039648, 0.007382, 0.117584],[19, -160675.616771, 0.016396, 0.006148, 0.123236],[21, -160676.052350, 0.010607, 0.013107, 0.115006]], "n":["SA_OTU138787"]},
	{"p":[[433, -160611.608374, 0.998976, 0.015850, 0.034601]], "n":["SA_OTU22690"]},
	{"p":[[433, -160605.423985, 0.998364, 0.015850, 0.033384]], "n":["SA_OTU139162"]},
	{"p":[[733, -160626.965730, 0.974743, 0.135983, 0.050505],[724, -160631.442354, 0.011085, 0.009504, 0.076697]], "n":["SA_OTU12745"]},
	{"p":[[433, -160614.493118, 0.997663, 0.015850, 0.038918]], "n":["SA_OTU51788"]},
	{"p":[[433, -160620.087822, 0.995166, 0.015849, 0.042311]], "n":["SA_OTU138355"]},
	{"p":[[433, -160609.216120, 0.998970, 0.015850, 0.034287]], "n":["SA_OTU139079"]},
	{"p":[[733, -160622.157353, 0.982686, 0.131104, 0.050777]], "n":["SA_OTU15713"]},
	{"p":[[733, -160627.622347, 0.972443, 0.135883, 0.050300],[724, -160631.881944, 0.013739, 0.010690, 0.075871]], "n":["SA_OTU52527"]},
	{"p":[[733, -160632.313386, 0.971274, 0.136155, 0.050624],[724, -160636.531421, 0.014304, 0.010683, 0.075887]], "n":["SA_OTU138144"]},
	{"p":[[23, -160653.824675, 0.572044, 0.087858, 0.095687],[19, -160654.806623, 0.214277, 0.004086, 0.108527],[22, -160654.825462, 0.210278, 0.003512, 0.105457]], "n":["SA_OTU137501"]},
	{"p":[[723, -160617.391250, 0.386607, 0.027537, 0.069103],[732, -160618.615671, 0.113634, 0.000001, 0.073607],[721, -160618.620405, 0.113098, 0.000001, 0.073614],[733, -160618.620848, 0.113048, 0.160597, 0.073622],[724, -160619.134775, 0.067619, 0.004649, 0.077152],[720, -160619.263184, 0.059470, 0.003848, 0.080071],[718, -160619.263423, 0.059456, 0.000001, 0.080073]], "n":["SA_OTU4012"]},
	{"p":[[723, -160618.287211, 0.386073, 0.027546, 0.069120],[732, -160619.509315, 0.113741, 0.000001, 0.073614],[721, -160619.514058, 0.113203, 0.000001, 0.073621],[733, -160619.514489, 0.113154, 0.160597, 0.073629],[724, -160620.029515, 0.067608, 0.004645, 0.077164],[720, -160620.156665, 0.059535, 0.003848, 0.080079],[718, -160620.156904, 0.059521, 0.000001, 0.080080]], "n":["SA_OTU6219"]},
	{"p":[[432, -160550.221101, 0.344073, 0.006785, 0.003728],[433, -160550.268711, 0.328076, 0.000001, 0.003729],[434, -160550.269395, 0.327851, 0.016065, 0.003730]], "n":["SA_OTU4494"]},
	{"p":[[432, -160555.190054, 0.343990, 0.006751, 0.007472],[433, -160555.237303, 0.328115, 0.000001, 0.007476],[434, -160555.237975, 0.327895, 0.016065, 0.007476]], "n":["SA_OTU139108"]},
	{"p":[[733, -160616.237788, 0.990139, 0.131807, 0.041456]], "n":["SA_OTU593"]},
	{"p":[[433, -160597.082653, 0.999385, 0.015850, 0.027984]], "n":["SA_OTU158447"]},
	{"p":[[733, -160618.535690, 0.988242, 0.132485, 0.043426]], "n":["SA_OTU52549"]},
	{"p":[[433, -160621.431531, 0.924388, 0.015850, 0.044187],[432, -160624.610878, 0.038466, 0.006211, 0.054960],[434, -160624.645816, 0.037146, 0.016065, 0.054972]], "n":["SA_OTU158473"]},
	{"p":[[20, -160653.344481, 0.613058, 0.009907, 0.093409],[22, -160654.326891, 0.229534, 0.013278, 0.090378],[23, -160654.778174, 0.146169, 0.069017, 0.070386],[21, -160657.348184, 0.011187, 0.005739, 0.096791]], "n":["SA_OTU9481"]},
	{"p":[[433, -160619.285650, 0.961932, 0.015850, 0.040497],[432, -160623.193612, 0.019317, 0.006001, 0.054958],[434, -160623.223324, 0.018751, 0.016065, 0.054954]], "n":["SA_OTU51907"]},
	{"p":[[433, -160604.188533, 0.938286, 0.015850, 0.039323],[432, -160607.595907, 0.031084, 0.005216, 0.051076],[434, -160607.610585, 0.030631, 0.016065, 0.051028]], "n":["SA_OTU158383"]},
	{"p":[[733, -160621.101532, 1.000000, 0.106009, 0.030685]], "n":["SA_OTU138409"]},
	{"p":[[433, -160595.249484, 0.334877, 0.001939, 0.041693],[432, -160595.253466, 0.333547, 0.004623, 0.042684],[434, -160595.259393, 0.331576, 0.016065, 0.042603]], "n":["SA_OTU161350"]},
	{"p":[[433, -160584.208601, 0.999750, 0.015850, 0.012090]], "n":["SA_OTU15550"]},
	{"p":[[433, -160608.996066, 0.931684, 0.015850, 0.035776],[432, -160612.285371, 0.034733, 0.006139, 0.046663],[434, -160612.319031, 0.033583, 0.016065, 0.046666]], "n":["SA_OTU48312"]},
	{"p":[[433, -160604.433651, 0.998959, 0.015850, 0.027917]], "n":["SA_OTU138818"]},
	{"p":[[433, -160599.073209, 0.998284, 0.015850, 0.030200]], "n":["SA_OTU48836"]},
	{"p":[[433, -160604.471926, 0.997303, 0.015850, 0.032450]], "n":["SA_OTU51844"]},
	{"p":[[433, -160602.708099, 0.997304, 0.015850, 0.032445]], "n":["SA_OTU22525"]},
	{"p":[[22, -160633.076660, 0.957525, 0.006599, 0.059457],[19, -160636.351877, 0.036203, 0.007153, 0.066716]], "n":["SA_OTU251295"]},
	{"p":[[20, -160644.690663, 0.579014, 0.009838, 0.087998],[22, -160645.638932, 0.224316, 0.013214, 0.084815],[23, -160645.824085, 0.186402, 0.068742, 0.064516],[21, -160648.727331, 0.010223, 0.006387, 0.090788]], "n":["SA_OTU9483"]},
	{"p":[[19, -160674.684454, 0.553530, 0.006476, 0.119519],[23, -160675.784383, 0.184267, 0.090067, 0.108261],[22, -160675.812026, 0.179243, 0.003471, 0.115278],[17, -160677.275484, 0.041483, 0.000001, 0.130085],[18, -160677.275666, 0.041476, 0.000001, 0.130086]], "n":["SA_OTU138826"]},
	{"p":[[22, -160649.729771, 0.419543, 0.003535, 0.095324],[19, -160649.741236, 0.414760, 0.004093, 0.098405],[23, -160650.691549, 0.160355, 0.095615, 0.094360]], "n":["SA_OTU49311"]},
	{"p":[[14, -160649.346409, 0.999189, 0.034759, 0.073710]], "n":["SA_OTU223687"]},
	{"p":[[720, -160600.228606, 0.207440, 0.003848, 0.051187],[718, -160600.228824, 0.207395, 0.000001, 0.051188],[719, -160600.228875, 0.207384, 0.000001, 0.051188],[721, -160601.028635, 0.093206, 0.001894, 0.048411],[732, -160601.201125, 0.078439, 0.000001, 0.048313],[733, -160601.227707, 0.076382, 0.160597, 0.048333],[717, -160601.738841, 0.045815, 0.000001, 0.051480]], "n":["SA_OTU139060"]},
	{"p":[[433, -160601.441701, 0.954439, 0.015850, 0.033525],[432, -160605.170443, 0.022929, 0.005138, 0.046498],[434, -160605.183457, 0.022632, 0.016065, 0.046444]], "n":["SA_OTU48267"]},
	{"p":[[733, -160610.246778, 0.994161, 0.132464, 0.033563]], "n":["SA_OTU15717"]},
	{"p":[[433, -160601.492484, 0.920805, 0.015850, 0.032525],[432, -160604.623757, 0.040204, 0.005985, 0.042467],[434, -160604.654399, 0.038991, 0.016065, 0.042460]], "n":["SA_OTU48851"]},
	{"p":[[432, -160617.103280, 0.343057, 0.006539, 0.042128],[433, -160617.146407, 0.328577, 0.000001, 0.042144],[434, -160617.147048, 0.328366, 0.016065, 0.042145]], "n":["SA_OTU158306"]},
	{"p":[[432, -160625.364630, 0.342948, 0.006573, 0.046217],[433, -160625.407270, 0.328632, 0.000001, 0.046234],[434, -160625.407911, 0.328421, 0.016065, 0.046234]], "n":["SA_OTU9534"]},
	{"p":[[432, -160625.074604, 0.342945, 0.006574, 0.046242],[433, -160625.117230, 0.328634, 0.000001, 0.046258],[434, -160625.117877, 0.328421, 0.016065, 0.046259]], "n":["SA_OTU12838"]},
	{"p":[[720, -160611.587769, 0.211393, 0.003848, 0.059688],[718, -160611.587979, 0.211349, 0.000001, 0.059688],[719, -160611.588036, 0.211337, 0.000001, 0.059688],[721, -160612.485852, 0.086111, 0.001976, 0.057098],[732, -160612.661416, 0.072246, 0.000001, 0.056977],[733, -160612.686794, 0.070435, 0.160597, 0.057000],[717, -160613.083783, 0.047357, 0.000001, 0.060107]], "n":["SA_OTU140267"]},
	{"p":[[433, -160581.634688, 0.999780, 0.015850, 0.007981]], "n":["SA_OTU12849"]},
	{"p":[[433, -160586.799465, 0.998859, 0.015850, 0.021671]], "n":["SA_OTU4499"]},
	{"p":[[433, -160600.210311, 0.859677, 0.015849, 0.031341],[432, -160602.698736, 0.071388, 0.006182, 0.038351],[434, -160602.733703, 0.068935, 0.016065, 0.038353]], "n":["SA_OTU7185"]},
	{"p":[[433, -160588.482936, 0.999417, 0.015850, 0.018126]], "n":["SA_OTU22526"]},
	{"p":[[433, -160601.642495, 0.948352, 0.015850, 0.030448],[432, -160605.229551, 0.026250, 0.006154, 0.042531],[434, -160605.262555, 0.025398, 0.016065, 0.042529]], "n":["SA_OTU138498"]},
	{"p":[[733, -160601.520174, 0.998326, 0.130846, 0.027465]], "n":["SA_OTU52557"]},
	{"p":[[19, -160641.530891, 0.596475, 0.004358, 0.089554],[23, -160642.510629, 0.223922, 0.095020, 0.085106],[22, -160642.774245, 0.172033, 0.000001, 0.089442]], "n":["SA_OTU49322"]},
	{"p":[[19, -160640.070102, 0.571906, 0.007591, 0.063296],[22, -160640.611431, 0.332835, 0.003918, 0.058537],[17, -160642.830622, 0.036178, 0.000001, 0.070323],[18, -160642.831715, 0.036139, 0.000001, 0.070329],[23, -160643.286803, 0.022926, 0.099105, 0.062316]], "n":["SA_OTU226033"]},
	{"p":[[720, -160617.663895, 0.213180, 0.003848, 0.063613],[718, -160617.664100, 0.213136, 0.000001, 0.063614],[719, -160617.664161, 0.213123, 0.000001, 0.063614],[721, -160618.600856, 0.083527, 0.002017, 0.061128],[732, -160618.778320, 0.069945, 0.000001, 0.060999],[733, -160618.803310, 0.068219, 0.160597, 0.061023],[717, -160619.153222, 0.048077, 0.000001, 0.064087]], "n":["SA_OTU174219"]},
	{"p":[[720, -160609.630825, 0.212339, 0.003848, 0.059362],[718, -160609.631035, 0.212294, 0.000001, 0.059362],[719, -160609.631092, 0.212282, 0.000001, 0.059362],[721, -160610.525507, 0.086791, 0.001972, 0.056778],[732, -160610.700918, 0.072827, 0.000001, 0.056658],[733, -160610.726312, 0.071001, 0.160597, 0.056681],[717, -160611.127382, 0.047543, 0.000001, 0.059774]], "n":["SA_OTU68799"]},
	{"p":[[733, -160612.816056, 0.999999, 0.112924, 0.021688]], "n":["SA_OTU139295"]},
	{"p":[[433, -160575.798920, 0.999318, 0.015850, 0.010359]], "n":["SA_OTU8536"]},
	{"p":[[433, -160595.908223, 0.928539, 0.015850, 0.024448],[432, -160599.149259, 0.036328, 0.006172, 0.034421],[434, -160599.182667, 0.035134, 0.016065, 0.034415]], "n":["SA_OTU9535"]},
	{"p":[[433, -160599.528088, 0.964158, 0.015850, 0.024820],[432, -160603.496499, 0.018226, 0.006207, 0.038539],[434, -160603.530508, 0.017616, 0.016065, 0.038537]], "n":["SA_OTU52149"]},
	{"p":[[433, -160591.904659, 0.995935, 0.015850, 0.023970]], "n":["SA_OTU51847"]},
	{"p":[[433, -160591.349392, 0.958838, 0.015850, 0.021792],[432, -160595.176207, 0.020882, 0.005973, 0.034468],[434, -160595.205499, 0.020280, 0.016065, 0.034452]], "n":["SA_OTU51793"]},
	{"p":[[433, -160585.062017, 0.999408, 0.015850, 0.015271]], "n":["SA_OTU139410"]},
	{"p":[[433, -160585.562196, 0.958858, 0.015850, 0.021783],[432, -160589.389310, 0.020877, 0.005922, 0.034449],[434, -160589.419034, 0.020265, 0.016065, 0.034436]], "n":["SA_OTU48724"]},
	{"p":[[433, -160587.164557, 0.958766, 0.015850, 0.021751],[432, -160590.988662, 0.020937, 0.005990, 0.034408],[434, -160591.019735, 0.020297, 0.016065, 0.034399]], "n":["SA_OTU23012"]},
	{"p":[[433, -160591.174833, 0.928529, 0.015850, 0.024448],[432, -160594.416550, 0.036302, 0.006022, 0.034415],[434, -160594.448269, 0.035169, 0.016065, 0.034407]], "n":["SA_OTU23721"]},
	{"p":[[19, -160632.359723, 0.607717, 0.007505, 0.058413],[22, -160633.069638, 0.298806, 0.003160, 0.054262],[17, -160635.228811, 0.034488, 0.000001, 0.065564],[18, -160635.230025, 0.034447, 0.000001, 0.065569],[23, -160635.569041, 0.024542, 0.099105, 0.057311]], "n":["SA_OTU139124"]},
	{"p":[[433, -160593.947018, 0.958822, 0.015850, 0.021803],[432, -160597.772466, 0.020911, 0.006072, 0.034478],[434, -160597.803721, 0.020267, 0.016065, 0.034467]], "n":["SA_OTU138303"]},
	{"p":[[432, -160612.496931, 0.343164, 0.006604, 0.038113],[433, -160612.540530, 0.328524, 0.000001, 0.038127],[434, -160612.541179, 0.328311, 0.016065, 0.038127]], "n":["SA_OTU138469"]},
	{"p":[[433, -160602.239484, 0.998162, 0.015850, 0.027299]], "n":["SA_OTU176639"]},
	{"p":[[720, -160606.666781, 0.208924, 0.003848, 0.055276],[718, -160606.666996, 0.208879, 0.000001, 0.055276],[719, -160606.667050, 0.208868, 0.000001, 0.055276],[721, -160607.515572, 0.089405, 0.001927, 0.052590],[732, -160607.688888, 0.075178, 0.000001, 0.052481],[733, -160607.714721, 0.073261, 0.160597, 0.052503],[717, -160608.169823, 0.046476, 0.000001, 0.055629]], "n":["SA_OTU11027"]},
	{"p":[[432, -160596.719655, 0.343354, 0.006578, 0.030297],[433, -160596.764095, 0.328429, 0.000001, 0.030310],[434, -160596.764743, 0.328217, 0.016065, 0.030310]], "n":["SA_OTU4197"]},
	{"p":[[433, -160590.076795, 0.951088, 0.015850, 0.019067],[432, -160593.720483, 0.024876, 0.006221, 0.030543],[434, -160593.754878, 0.024035, 0.016065, 0.030538]], "n":["SA_OTU15747"]},
	{"p":[[433, -160592.789403, 0.911800, 0.015849, 0.021782],[432, -160595.800816, 0.044881, 0.006267, 0.030510],[434, -160595.836216, 0.043320, 0.016065, 0.030508]], "n":["SA_OTU10810"]},
	{"p":[[22, -160639.332401, 0.497505, 0.013091, 0.073250],[20, -160639.377553, 0.475541, 0.007453, 0.076393],[21, -160642.480158, 0.021367, 0.009208, 0.077679],[23, -160643.839123, 0.005490, 0.077357, 0.060234]], "n":["SA_OTU22509"]},
	{"p":[[433, -160594.769520, 0.998862, 0.015850, 0.021745]], "n":["SA_OTU52011"]},
	{"p":[[433, -160590.560335, 0.911684, 0.015849, 0.021740],[432, -160593.570436, 0.044934, 0.006252, 0.030462],[434, -160593.605576, 0.043382, 0.016065, 0.030458]], "n":["SA_OTU138381"]},
	{"p":[[433, -160577.378915, 0.999379, 0.015850, 0.012636]], "n":["SA_OTU15763"]},
	{"p":[[19, -160618.947613, 0.533333, 0.007210, 0.048959],[22, -160619.305476, 0.372890, 0.003542, 0.043816],[23, -160621.352294, 0.048157, 0.094563, 0.043455],[17, -160622.098874, 0.022826, 0.000001, 0.056731],[18, -160622.100250, 0.022794, 0.000001, 0.056736]], "n":["SA_OTU51936"]},
	{"p":[[433, -160587.238442, 0.997224, 0.015850, 0.019201]], "n":["SA_OTU15607"]},
	{"p":[[433, -160579.143359, 0.999379, 0.015850, 0.012639]], "n":["SA_OTU12766"]},
	{"p":[[19, -160626.609096, 0.616918, 0.005083, 0.047019],[22, -160627.750347, 0.197055, 0.000001, 0.047428],[23, -160627.815996, 0.184534, 0.099103, 0.047508]], "n":["SA_OTU139284"]},
	{"p":[[18, -160624.685322, 0.333363, 0.000001, 0.070968],[17, -160624.685353, 0.333353, 0.000001, 0.070968],[19, -160624.685724, 0.333229, 0.011819, 0.070966]], "n":["SA_OTU15617"]},
	{"p":[[5, -160631.377372, 0.999039, 0.079337, 0.058406]], "n":["SA_OTU15850"]},
	{"p":[[438, -160720.715237, 0.553885, 0.021282, 0.338592],[437, -160722.489347, 0.093958, 0.000001, 0.363619],[434, -160722.490514, 0.093848, 0.000001, 0.363652],[464, -160722.748876, 0.072480, 0.062509, 0.318287],[436, -160722.776835, 0.070482, 0.004411, 0.368560],[435, -160722.777164, 0.070459, 0.000922, 0.368589],[463, -160724.398283, 0.013928, 0.000001, 0.353091]], "n":["SA_OTU158424"]},
	{"p":[[720, -160603.323834, 0.206113, 0.003848, 0.051158],[718, -160603.324053, 0.206068, 0.000001, 0.051159],[719, -160603.324104, 0.206058, 0.000001, 0.051158],[721, -160604.120486, 0.092923, 0.001886, 0.048376],[732, -160604.291633, 0.078306, 0.000001, 0.048275],[733, -160604.318008, 0.076268, 0.160597, 0.048295],[717, -160604.832831, 0.045578, 0.000001, 0.051449]], "n":["SA_OTU215042"]},
	{"p":[[433, -160573.517477, 0.998323, 0.015850, 0.014136]], "n":["SA_OTU6237"]},
	{"p":[[433, -160581.912498, 0.886198, 0.015850, 0.019246],[432, -160584.641905, 0.057832, 0.006047, 0.026563],[434, -160584.674624, 0.055970, 0.016065, 0.026554]], "n":["SA_OTU23007"]},
	{"p":[[22, -160650.983977, 0.446902, 0.003834, 0.082375],[19, -160651.170537, 0.370843, 0.005949, 0.087524],[23, -160652.066953, 0.151315, 0.089055, 0.075322],[17, -160654.347410, 0.015470, 0.000001, 0.099116],[18, -160654.347586, 0.015467, 0.000001, 0.099116]], "n":["SA_OTU138741"]},
	{"p":[[22, -160649.754569, 0.469489, 0.004146, 0.081404],[19, -160650.042488, 0.352034, 0.005928, 0.087041],[23, -160650.898371, 0.149582, 0.088866, 0.074638],[17, -160653.235922, 0.014444, 0.000001, 0.098640],[18, -160653.236095, 0.014442, 0.000001, 0.098640]], "n":["SA_OTU52099"]},
	{"p":[[433, -160575.434168, 0.999382, 0.015850, 0.012610]], "n":["SA_OTU22466"]},
	{"p":[[22, -160605.715901, 0.988155, 0.008192, 0.030121]], "n":["SA_OTU139066"]},
	{"p":[[19, -160613.190518, 0.569513, 0.007143, 0.044380],[22, -160613.641891, 0.362639, 0.003183, 0.040108],[23, -160616.320552, 0.024897, 0.098835, 0.042837],[17, -160616.467647, 0.021491, 0.000001, 0.052224],[18, -160616.469137, 0.021459, 0.000001, 0.052229]], "n":["SA_OTU22478"]},
	{"p":[[433, -160586.216726, 0.988094, 0.015850, 0.020964]], "n":["SA_OTU51791"]},
	{"p":[[433, -160590.499766, 0.490171, 0.011292, 0.026084],[432, -160591.133881, 0.259989, 0.006430, 0.026489],[434, -160591.173701, 0.249840, 0.016065, 0.026496]], "n":["SA_OTU139363"]},
	{"p":[[433, -160583.263105, 0.998325, 0.015850, 0.014147]], "n":["SA_OTU173184"]},
	{"p":[[432, -160598.804045, 0.343361, 0.006648, 0.030270],[433, -160598.848513, 0.328427, 0.000001, 0.030281],[434, -160598.849165, 0.328213, 0.016065, 0.030281]], "n":["SA_OTU52432"]},
	{"p":[[433, -160585.357563, 0.939123, 0.015849, 0.016500],[432, -160588.769380, 0.030973, 0.006253, 0.026584],[434, -160588.804516, 0.029904, 0.016065, 0.026579]], "n":["SA_OTU22317"]},
	{"p":[[19, -160645.583705, 0.577153, 0.004245, 0.074711],[23, -160646.415302, 0.251266, 0.094366, 0.069919],[22, -160646.823680, 0.167023, 0.000001, 0.074484]], "n":["SA_OTU53021"]},
	{"p":[[433, -160590.103435, 0.979831, 0.015850, 0.022580],[434, -160594.679610, 0.010087, 0.016065, 0.025651],[432, -160594.679971, 0.010083, 0.000001, 0.025651]], "n":["SA_OTU139050"]},
	{"p":[[19, -160629.468962, 0.617055, 0.005083, 0.046997],[22, -160630.610776, 0.196988, 0.000001, 0.047406],[23, -160630.676455, 0.184466, 0.099103, 0.047486]], "n":["SA_OTU22475"]},
	{"p":[[19, -160611.221630, 0.507233, 0.007059, 0.044011],[22, -160611.452655, 0.402601, 0.003607, 0.038757],[23, -160613.472529, 0.053414, 0.094287, 0.038222],[17, -160614.538807, 0.018390, 0.000001, 0.052060],[18, -160614.540280, 0.018363, 0.000001, 0.052065]], "n":["SA_OTU138156"]},
	{"p":[[22, -160635.446529, 0.672518, 0.004382, 0.066745],[23, -160636.663688, 0.199112, 0.090328, 0.062545],[19, -160637.105348, 0.128023, 0.003128, 0.070367]], "n":["SA_OTU137448"]},
	{"p":[[902, -160716.976734, 0.785330, 0.036809, 0.219873],[901, -160719.142481, 0.090049, 0.000001, 0.233646],[46, -160719.153675, 0.089047, 0.000001, 0.233867],[903, -160720.994509, 0.014130, 0.120440, 0.230810],[25, -160721.022238, 0.013744, 0.018342, 0.229235]], "n":["SA_OTU134775"]},
	{"p":[[433, -160570.401678, 0.999200, 0.015850, 0.008423]], "n":["SA_OTU6170"]},
	{"p":[[433, -160582.233836, 0.338946, 0.003498, 0.020859],[432, -160582.238104, 0.337502, 0.006441, 0.022546],[434, -160582.280319, 0.323551, 0.016065, 0.022548]], "n":["SA_OTU14779"]},
	{"p":[[433, -160574.502378, 0.997858, 0.015850, 0.012122]], "n":["SA_OTU22375"]},
	{"p":[[433, -160580.769219, 0.401403, 0.007510, 0.017893],[432, -160581.041451, 0.305740, 0.006479, 0.022636],[434, -160581.084504, 0.292856, 0.016065, 0.022640]], "n":["SA_OTU157860"]},
	{"p":[[432, -160578.894336, 0.343602, 0.006563, 0.022525],[433, -160578.939874, 0.328306, 0.000001, 0.022538],[434, -160578.940523, 0.328093, 0.016065, 0.022538]], "n":["SA_OTU23772"]},
	{"p":[[433, -160582.644263, 0.844915, 0.015850, 0.016909],[432, -160585.014019, 0.079003, 0.006365, 0.022661],[434, -160585.051684, 0.076082, 0.016065, 0.022659]], "n":["SA_OTU138531"]},
	{"p":[[433, -160569.941340, 0.999202, 0.015850, 0.008447]], "n":["SA_OTU51953"]},
	{"p":[[433, -160574.620092, 0.995206, 0.015849, 0.014773]], "n":["SA_OTU52111"]},
	{"p":[[433, -160568.924238, 0.775768, 0.015849, 0.014743],[432, -160570.841448, 0.114051, 0.006087, 0.018738],[434, -160570.875970, 0.110181, 0.016065, 0.018730]], "n":["SA_OTU73469"]},
	{"p":[[23, -160625.250090, 0.583998, 0.084862, 0.051812],[22, -160625.735398, 0.359456, 0.004840, 0.060934],[19, -160627.587279, 0.056414, 0.003031, 0.065186]], "n":["SA_OTU137558"]},
	{"p":[[433, -160576.673362, 0.612888, 0.015778, 0.020911],[432, -160577.807299, 0.197205, 0.006251, 0.022578],[434, -160577.845013, 0.189906, 0.016065, 0.022580]], "n":["SA_OTU158553"]},
	{"p":[[433, -160584.454500, 0.979868, 0.015850, 0.022529],[434, -160589.032565, 0.010068, 0.016065, 0.025591],[432, -160589.032912, 0.010064, 0.000001, 0.025592]], "n":["SA_OTU139428"]},
	{"p":[[19, -160652.841568, 0.429537, 0.003009, 0.078941],[22, -160653.237016, 0.289241, 0.000001, 0.078952],[23, -160653.267697, 0.280501, 0.099105, 0.079026]], "n":["SA_OTU138723"]},
	{"p":[[19, -160663.935993, 0.482881, 0.004669, 0.089062],[22, -160664.610546, 0.245972, 0.000001, 0.088935],[23, -160664.642031, 0.238348, 0.099105, 0.089016],[17, -160667.318411, 0.016401, 0.000001, 0.098315],[18, -160667.318593, 0.016398, 0.000001, 0.098315]], "n":["SA_OTU138728"]},
	{"p":[[12, -160596.466100, 0.786919, 0.007878, 0.035395],[15, -160598.522555, 0.100652, 0.001368, 0.036271],[16, -160598.573948, 0.095610, 0.093974, 0.036756],[13, -160600.635689, 0.012165, 0.008189, 0.046175]], "n":["SA_OTU196313"]},
	{"p":[[732, -160578.975643, 0.258478, 0.000001, 0.023462],[721, -160578.979483, 0.257487, 0.000001, 0.023463],[733, -160578.979991, 0.257356, 0.160597, 0.023470],[723, -160579.976545, 0.095003, 0.023411, 0.022193],[720, -160580.856773, 0.039397, 0.003848, 0.030484],[719, -160580.857060, 0.039385, 0.000001, 0.030485],[718, -160580.857072, 0.039385, 0.000001, 0.030485]], "n":["SA_OTU141803"]},
	{"p":[[733, -160590.658330, 0.999998, 0.117004, 0.005367]], "n":["SA_OTU139096"]},
	{"p":[[433, -160574.200570, 0.502561, 0.010098, 0.018108],[432, -160574.883966, 0.253743, 0.006345, 0.018741],[434, -160574.924361, 0.243697, 0.016065, 0.018749]], "n":["SA_OTU12998"]},
	{"p":[[433, -160572.436390, 0.502568, 0.010097, 0.018105],[432, -160573.119815, 0.253739, 0.006344, 0.018739],[434, -160573.160212, 0.243693, 0.016065, 0.018747]], "n":["SA_OTU9546"]},
	{"p":[[433, -160565.097252, 0.998967, 0.015850, 0.006831]], "n":["SA_OTU7759"]},
	{"p":[[433, -160576.915860, 0.367573, 0.005871, 0.015454],[432, -160577.044658, 0.323152, 0.006492, 0.018699],[434, -160577.088549, 0.309275, 0.016065, 0.018702]], "n":["SA_OTU48153"]},
	{"p":[[433, -160578.525597, 0.365672, 0.005784, 0.015525],[432, -160578.647856, 0.323590, 0.006467, 0.018693],[434, -160578.688386, 0.310737, 0.016065, 0.018685]], "n":["SA_OTU15644"]},
	{"p":[[433, -160581.353593, 0.338954, 0.003520, 0.020868],[432, -160581.357313, 0.337696, 0.006493, 0.022563],[434, -160581.400724, 0.323350, 0.016065, 0.022567]], "n":["SA_OTU158371"]},
	{"p":[[433, -160559.656169, 0.998966, 0.015850, 0.006825]], "n":["SA_OTU48238"]},
	{"p":[[22, -160630.883881, 0.964834, 0.009120, 0.063368],[20, -160634.546958, 0.024751, 0.007091, 0.067709]], "n":["SA_OTU10838"]},
	{"p":[[22, -160639.108575, 0.483173, 0.004193, 0.071304],[19, -160639.535463, 0.315288, 0.005694, 0.077029],[23, -160640.086812, 0.181660, 0.088164, 0.063950],[17, -160642.992756, 0.009936, 0.000001, 0.089248],[18, -160642.992915, 0.009935, 0.000001, 0.089247]], "n":["SA_OTU15618"]},
	{"p":[[433, -160581.079581, 0.365509, 0.005806, 0.015548],[432, -160581.199054, 0.324348, 0.006650, 0.018721],[434, -160581.243841, 0.310142, 0.016065, 0.018724]], "n":["SA_OTU15645"]},
	{"p":[[433, -160580.791095, 0.365712, 0.005819, 0.015562],[432, -160580.911518, 0.324220, 0.006643, 0.018742],[434, -160580.956147, 0.310068, 0.016065, 0.018744]], "n":["SA_OTU48190"]},
	{"p":[[432, -160581.553794, 0.343664, 0.006707, 0.018708],[433, -160581.599600, 0.328277, 0.000001, 0.018715],[434, -160581.600265, 0.328059, 0.016065, 0.018715]], "n":["SA_OTU139328"]},
	{"p":[[22, -160635.891961, 0.481224, 0.004200, 0.071066],[19, -160636.324141, 0.312359, 0.005687, 0.076785],[23, -160636.837815, 0.186882, 0.087960, 0.063479],[17, -160639.789559, 0.009764, 0.000001, 0.088991],[18, -160639.789715, 0.009763, 0.000001, 0.088990]], "n":["SA_OTU52096"]},
	{"p":[[432, -160587.178683, 0.338401, 0.006618, 0.022518],[433, -160587.180418, 0.337814, 0.003391, 0.020899],[434, -160587.222835, 0.323785, 0.016065, 0.022522]], "n":["SA_OTU138643"]},
	{"p":[[432, -160581.925238, 0.343671, 0.006704, 0.018692],[433, -160581.971064, 0.328277, 0.000001, 0.018699],[434, -160581.971752, 0.328052, 0.016065, 0.018699]], "n":["SA_OTU138457"]},
	{"p":[[22, -160641.200292, 0.553186, 0.004215, 0.071349],[19, -160641.612099, 0.366460, 0.005734, 0.077016],[23, -160643.475113, 0.056876, 0.094380, 0.071049],[17, -160645.053346, 0.011736, 0.000001, 0.089071],[18, -160645.053509, 0.011734, 0.000001, 0.089070]], "n":["SA_OTU138814"]},
	{"p":[[718, -160622.194102, 0.669048, 0.002275, 0.045398],[719, -160623.662238, 0.154118, 0.000000, 0.046229],[720, -160624.403363, 0.073449, 0.003848, 0.049350],[712, -160625.750725, 0.019091, 0.000624, 0.049772],[715, -160625.753858, 0.019032, 0.000001, 0.049773],[716, -160625.755143, 0.019007, 0.000683, 0.049773],[711, -160625.757655, 0.018959, 0.000001, 0.049774]], "n":["SA_OTU139043"]},
	{"p":[[433, -160590.659749, 0.685634, 0.015849, 0.027426],[432, -160592.114928, 0.159999, 0.006203, 0.030317],[434, -160592.150761, 0.154367, 0.016065, 0.030318]], "n":["SA_OTU74135"]},
	{"p":[[23, -160603.258836, 0.496203, 0.093132, 0.027562],[22, -160603.926398, 0.254531, 0.003780, 0.028931],[19, -160603.994935, 0.237671, 0.006715, 0.034413],[17, -160607.707586, 0.005802, 0.000001, 0.043197],[18, -160607.709292, 0.005792, 0.000001, 0.043202]], "n":["SA_OTU106046"]},
	{"p":[[902, -160696.545168, 0.829124, 0.035989, 0.184265],[901, -160698.954345, 0.074529, 0.013725, 0.195386],[46, -160699.283527, 0.053625, 0.001041, 0.197377],[903, -160700.293902, 0.019524, 0.120440, 0.195152],[25, -160700.358414, 0.018304, 0.008329, 0.194444]], "n":["SA_OTU49040"]},
	{"p":[[23, -160604.107176, 0.938561, 0.090962, 0.023080],[19, -160607.118986, 0.046180, 0.006057, 0.031807],[22, -160608.252579, 0.014864, 0.002915, 0.028826]], "n":["SA_OTU183751"]},
	{"p":[[902, -160724.658923, 0.131028, 0.014543, 0.273071],[398, -160724.788533, 0.115100, 0.013914, 0.302662],[397, -160724.790863, 0.114833, 0.000001, 0.302678],[396, -160724.791005, 0.114816, 0.000001, 0.302680],[25, -160724.905686, 0.102376, 0.050209, 0.272550],[399, -160725.060918, 0.087656, 0.000001, 0.303440],[400, -160725.061816, 0.087577, 0.017371, 0.303452]], "n":["SA_OTU1317"]},
	{"p":[[12, -160588.934654, 0.800751, 0.007623, 0.026112],[15, -160591.025956, 0.098914, 0.002018, 0.026400],[16, -160591.115053, 0.090482, 0.093974, 0.027130]], "n":["SA_OTU46822"]},
	{"p":[[16, -160587.496571, 0.651881, 0.086085, 0.022182],[12, -160588.244885, 0.308446, 0.007723, 0.026478],[15, -160590.362184, 0.037123, 0.001107, 0.026981]], "n":["SA_OTU198545"]},
	{"p":[[846, -160582.314367, 0.844566, 0.012852, 0.024088],[845, -160584.273329, 0.119088, 0.001762, 0.028945],[847, -160585.480877, 0.035599, 0.006933, 0.030745]], "n":["SA_OTU157080"]},
	{"p":[[44, -160616.173984, 0.999915, 0.066693, 0.049206]], "n":["SA_OTU48543"]},
	{"p":[[44, -160639.569400, 1.000000, 0.089955, 0.068728]], "n":["SA_OTU161100"]},
	{"p":[[432, -160566.569386, 0.343776, 0.006541, 0.014892],[433, -160566.615873, 0.328161, 0.000001, 0.014904],[434, -160566.616167, 0.328064, 0.016066, 0.014904]], "n":["SA_OTU3330"]},
	{"p":[[433, -160561.443658, 0.998465, 0.015850, 0.005540]], "n":["SA_OTU3503"]},
	{"p":[[432, -160576.544479, 0.342776, 0.006433, 0.018689],[433, -160576.586307, 0.328734, 0.000001, 0.018689],[434, -160576.587053, 0.328489, 0.016065, 0.018690]], "n":["SA_OTU158363"]},
	{"p":[[432, -160564.805124, 0.343776, 0.006541, 0.014890],[433, -160564.851617, 0.328159, 0.000001, 0.014903],[434, -160564.851907, 0.328064, 0.016066, 0.014903]], "n":["SA_OTU4653"]},
	{"p":[[432, -160570.025873, 0.343113, 0.006510, 0.014921],[433, -160570.069392, 0.328502, 0.000001, 0.014923],[434, -160570.069749, 0.328385, 0.016066, 0.014924]], "n":["SA_OTU5277"]},
	{"p":[[433, -160567.416754, 0.440236, 0.008214, 0.009390],[432, -160567.847679, 0.286113, 0.006501, 0.014908],[434, -160567.892210, 0.273651, 0.016066, 0.014913]], "n":["SA_OTU14790"]},
	{"p":[[433, -160567.314188, 0.440277, 0.008203, 0.009376],[432, -160567.746814, 0.285653, 0.006361, 0.014889],[434, -160567.788212, 0.274069, 0.016066, 0.014886]], "n":["SA_OTU48199"]},
	{"p":[[433, -160565.422348, 0.440368, 0.008199, 0.009371],[432, -160565.856241, 0.285351, 0.006276, 0.014882],[434, -160565.895807, 0.274281, 0.016066, 0.014875]], "n":["SA_OTU48195"]},
	{"p":[[433, -160572.558938, 0.436018, 0.008154, 0.009512],[432, -160572.974438, 0.287777, 0.006500, 0.014899],[434, -160573.015480, 0.276205, 0.016066, 0.014891]], "n":["SA_OTU22724"]},
	{"p":[[432, -160577.433039, 0.342153, 0.006433, 0.018683],[433, -160577.472102, 0.329046, 0.000001, 0.018673],[434, -160577.472847, 0.328801, 0.016065, 0.018674]], "n":["SA_OTU42158"]},
	{"p":[[432, -160578.953485, 0.343671, 0.006703, 0.018680],[433, -160578.999323, 0.328273, 0.000001, 0.018686],[434, -160578.999984, 0.328056, 0.016065, 0.018687]], "n":["SA_OTU20346"]},
	{"p":[[432, -160573.031095, 0.338531, 0.006513, 0.014900],[433, -160573.036661, 0.336652, 0.002885, 0.013561],[434, -160573.072450, 0.324817, 0.016066, 0.014893]], "n":["SA_OTU22733"]},
	{"p":[[433, -160574.772952, 0.435980, 0.008167, 0.009528],[432, -160575.186549, 0.288299, 0.006656, 0.014921],[434, -160575.231159, 0.275721, 0.016066, 0.014921]], "n":["SA_OTU12827"]},
	{"p":[[432, -160582.428751, 0.343473, 0.006685, 0.018709],[433, -160582.473658, 0.328390, 0.000001, 0.018712],[434, -160582.474428, 0.328137, 0.016065, 0.018714]], "n":["SA_OTU56533"]},
	{"p":[[433, -160572.728098, 0.436114, 0.008157, 0.009512],[432, -160573.143859, 0.287765, 0.006512, 0.014902],[434, -160573.185165, 0.276121, 0.016066, 0.014894]], "n":["SA_OTU52235"]},
	{"p":[[19, -160543.027456, 0.554172, 0.010116, 0.000001],[17, -160543.937502, 0.223057, 0.000001, 0.001703],[18, -160543.939710, 0.222565, 0.000001, 0.001698]], "n":["SA_OTU15538"]},
	{"p":[[17, -160605.409805, 0.333353, 0.000001, 0.035752],[18, -160605.409839, 0.333341, 0.000001, 0.035754],[19, -160605.410084, 0.333259, 0.011819, 0.035752]], "n":["SA_OTU139126"]},
	{"p":[[902, -160705.389286, 0.701919, 0.024351, 0.195346],[25, -160707.123871, 0.123870, 0.026279, 0.201745],[903, -160707.239221, 0.110375, 0.120440, 0.204124],[11, -160708.818278, 0.022756, 0.000001, 0.211521],[24, -160708.821968, 0.022672, 0.003698, 0.211916]], "n":["SA_OTU3243"]},
	{"p":[[432, -160569.777218, 0.343710, 0.006578, 0.014886],[433, -160569.823410, 0.328194, 0.000001, 0.014896],[434, -160569.823709, 0.328096, 0.016066, 0.014896]], "n":["SA_OTU161373"]},
	{"p":[[433, -160566.984456, 0.776166, 0.015849, 0.014706],[432, -160568.903919, 0.113852, 0.006082, 0.018696],[434, -160568.938514, 0.109981, 0.016065, 0.018689]], "n":["SA_OTU96866"]},
	{"p":[[433, -160574.292975, 0.432686, 0.008536, 0.014359],[432, -160574.698108, 0.288553, 0.006198, 0.018683],[434, -160574.732635, 0.278761, 0.016065, 0.018662]], "n":["SA_OTU219061"]},
	{"p":[[23, -160624.362488, 0.959771, 0.087891, 0.048267],[19, -160627.799441, 0.030869, 0.004064, 0.060022]], "n":["SA_OTU136448"]},
	{"p":[[432, -160573.813772, 0.339363, 0.006705, 0.014882],[433, -160573.822133, 0.336537, 0.002947, 0.013523],[434, -160573.859789, 0.324100, 0.016066, 0.014886]], "n":["SA_OTU263992"]},
	{"p":[[846, -160574.309313, 0.871752, 0.012791, 0.018990],[845, -160576.477568, 0.099708, 0.001730, 0.023869],[847, -160577.749872, 0.027937, 0.006933, 0.025489]], "n":["SA_OTU9111"]},
	{"p":[[44, -160625.554741, 1.000000, 0.088515, 0.057888]], "n":["SA_OTU161113"]},
	{"p":[[724, -160575.358861, 0.652357, 0.004434, 0.015515],[723, -160576.248897, 0.267884, 0.014876, 0.013065],[732, -160578.381313, 0.031758, 0.003388, 0.018717],[721, -160578.678768, 0.023587, 0.000001, 0.018881],[733, -160579.154893, 0.014652, 0.160597, 0.019328]], "n":["SA_OTU272367"]},
	{"p":[[432, -160574.983983, 0.343665, 0.006584, 0.018641],[433, -160575.029799, 0.328275, 0.000001, 0.018652],[434, -160575.030453, 0.328060, 0.016065, 0.018652]], "n":["SA_OTU6677"]},
	{"p":[[432, -160566.228146, 0.343833, 0.006745, 0.011137],[433, -160566.274879, 0.328135, 0.000001, 0.011141],[434, -160566.275194, 0.328032, 0.016066, 0.011141]], "n":["SA_OTU4618"]},
	{"p":[[433, -160560.289518, 0.688943, 0.011263, 0.000001],[432, -160561.758424, 0.158579, 0.006423, 0.011141],[434, -160561.797652, 0.152479, 0.016066, 0.011126]], "n":["SA_OTU15646"]},
	{"p":[[432, -160564.463776, 0.343834, 0.006745, 0.011136],[433, -160564.510514, 0.328134, 0.000001, 0.011140],[434, -160564.510825, 0.328032, 0.016066, 0.011140]], "n":["SA_OTU7181"]},
	{"p":[[433, -160559.039876, 0.688924, 0.011254, 0.000001],[432, -160560.509770, 0.158418, 0.006324, 0.011120],[434, -160560.546804, 0.152658, 0.016066, 0.011100]], "n":["SA_OTU15647"]},
	{"p":[[432, -160572.211457, 0.338973, 0.006605, 0.014903],[433, -160572.218853, 0.336475, 0.002895, 0.013563],[434, -160572.254934, 0.324551, 0.016066, 0.014901]], "n":["SA_OTU52311"]},
	{"p":[[433, -160562.062594, 0.382632, 0.006067, 0.007790],[432, -160562.257616, 0.314836, 0.006450, 0.011136],[434, -160562.297481, 0.302532, 0.016066, 0.011123]], "n":["SA_OTU51303"]},
	{"p":[[433, -160567.331471, 0.437059, 0.008181, 0.009504],[432, -160567.750513, 0.287443, 0.006552, 0.014913],[434, -160567.792956, 0.275498, 0.016066, 0.014908]], "n":["SA_OTU52243"]},
	{"p":[[433, -160560.029008, 0.689659, 0.011255, 0.000001],[432, -160561.502244, 0.158058, 0.006333, 0.011108],[434, -160561.539462, 0.152283, 0.016066, 0.011089]], "n":["SA_OTU52234"]},
	{"p":[[433, -160563.154362, 0.382372, 0.006073, 0.007775],[432, -160563.346103, 0.315656, 0.006642, 0.011118],[434, -160563.390422, 0.301972, 0.016066, 0.011115]], "n":["SA_OTU51281"]},
	{"p":[[433, -160566.974054, 0.382038, 0.006071, 0.007796],[432, -160567.163649, 0.316058, 0.006706, 0.011138],[434, -160567.209466, 0.301904, 0.016066, 0.011138]], "n":["SA_OTU15633"]},
	{"p":[[22, -160592.714877, 0.578850, 0.004167, 0.019639],[19, -160593.114557, 0.388139, 0.006407, 0.025225],[23, -160596.016982, 0.021305, 0.098182, 0.023466],[17, -160597.308081, 0.005858, 0.000001, 0.034704],[18, -160597.310009, 0.005847, 0.000001, 0.034708]], "n":["SA_OTU51927"]},
	{"p":[[19, -160584.015874, 0.805916, 0.005737, 0.028178],[23, -160586.024663, 0.108114, 0.093171, 0.020348],[22, -160586.440881, 0.071305, 0.000001, 0.026815]], "n":["SA_OTU138796"]},
	{"p":[[17, -160601.708077, 0.333354, 0.000001, 0.035705],[18, -160601.708116, 0.333340, 0.000001, 0.035707],[19, -160601.708360, 0.333259, 0.011819, 0.035705]], "n":["SA_OTU139201"]},
	{"p":[[19, -160588.933581, 0.902939, 0.006560, 0.025806],[22, -160591.895087, 0.046719, 0.001907, 0.024494],[23, -160592.061925, 0.039540, 0.099103, 0.025755]], "n":["SA_OTU139493"]},
	{"p":[[17, -160592.028138, 0.332810, 0.000001, 0.031604],[18, -160592.028274, 0.332765, 0.000001, 0.031606],[19, -160592.028320, 0.332750, 0.011819, 0.031603]], "n":["SA_OTU185693"]},
	{"p":[[432, -160569.956816, 0.342766, 0.006545, 0.014885],[433, -160569.998799, 0.328674, 0.000001, 0.014880],[434, -160569.999146, 0.328560, 0.016066, 0.014880]], "n":["SA_OTU264479"]},
	{"p":[[851, -160598.225946, 0.999999, 0.018497, 0.037475]], "n":["SA_OTU68451"]},
	{"p":[[902, -160714.743759, 0.803093, 0.030074, 0.226380],[901, -160717.612811, 0.045578, 0.000001, 0.243702],[25, -160717.648328, 0.043987, 0.024233, 0.230419],[46, -160717.678759, 0.042669, 0.000001, 0.244803],[903, -160717.684055, 0.042444, 0.120440, 0.233203],[11, -160718.956328, 0.011892, 0.008665, 0.227110],[24, -160719.211461, 0.009214, 0.000001, 0.235745]], "n":["SA_OTU195120"]},
	{"p":[[432, -160558.923510, 0.343970, 0.006768, 0.007398],[433, -160558.970667, 0.328126, 0.000001, 0.007400],[434, -160558.971345, 0.327904, 0.016065, 0.007400]], "n":["SA_OTU22268"]},
	{"p":[[432, -160556.396480, 0.343984, 0.006759, 0.007396],[433, -160556.443696, 0.328119, 0.000001, 0.007399],[434, -160556.444375, 0.327897, 0.016065, 0.007399]], "n":["SA_OTU9442"]},
	{"p":[[432, -160553.125245, 0.344024, 0.006728, 0.007401],[433, -160553.172645, 0.328098, 0.000001, 0.007405],[434, -160553.173318, 0.327877, 0.016065, 0.007406]], "n":["SA_OTU51283"]},
	{"p":[[433, -160563.972430, 0.382724, 0.006092, 0.007772],[432, -160564.165229, 0.315613, 0.006667, 0.011129],[434, -160564.210436, 0.301663, 0.016066, 0.011129]], "n":["SA_OTU51333"]},
	{"p":[[432, -160554.560457, 0.344014, 0.006737, 0.007391],[433, -160554.607807, 0.328105, 0.000001, 0.007396],[434, -160554.608492, 0.327881, 0.016065, 0.007396]], "n":["SA_OTU51896"]},
	{"p":[[433, -160555.018206, 0.629337, 0.009624, 0.000001],[432, -160556.219333, 0.189339, 0.006582, 0.007387],[434, -160556.262587, 0.181324, 0.016065, 0.007379]], "n":["SA_OTU51248"]},
	{"p":[[718, -160604.035836, 0.722314, 0.002275, 0.029536],[719, -160605.576470, 0.154752, 0.000000, 0.030056],[720, -160606.652394, 0.052768, 0.003847, 0.033329],[712, -160608.034481, 0.013248, 0.000619, 0.033619],[715, -160608.037721, 0.013205, 0.000001, 0.033620],[716, -160608.039001, 0.013188, 0.000676, 0.033619],[711, -160608.041482, 0.013155, 0.000001, 0.033619]], "n":["SA_OTU138404"]},
	{"p":[[23, -160631.985117, 0.902678, 0.090459, 0.054223],[19, -160634.661014, 0.062145, 0.004267, 0.064511],[22, -160635.296673, 0.032911, 0.000001, 0.064044]], "n":["SA_OTU138808"]},
	{"p":[[723, -160573.693940, 0.195600, 0.018111, 0.016321],[733, -160573.883770, 0.161781, 0.153860, 0.012454],[721, -160574.193012, 0.118747, 0.001264, 0.019329],[732, -160574.244527, 0.112785, 0.000274, 0.019119],[724, -160574.540162, 0.083919, 0.004513, 0.019488],[720, -160574.838589, 0.062266, 0.000001, 0.022192],[717, -160574.839462, 0.062212, 0.000001, 0.022200]], "n":["SA_OTU53226"]},
	{"p":[[713, -160581.496126, 0.313572, 0.000001, 0.021990],[714, -160581.496895, 0.313331, 0.000001, 0.021990],[715, -160581.497955, 0.312999, 0.001139, 0.021991],[712, -160584.547614, 0.014828, 0.000001, 0.025276],[716, -160584.552128, 0.014762, 0.001272, 0.025309],[711, -160584.621438, 0.013773, 0.000001, 0.025543],[717, -160584.621456, 0.013773, 0.005282, 0.025544]], "n":["SA_OTU165792"]},
	{"p":[[433, -160554.183187, 0.629772, 0.009620, 0.000001],[432, -160555.388789, 0.188624, 0.006349, 0.007384],[434, -160555.426718, 0.181604, 0.016065, 0.007363]], "n":["SA_OTU52245"]},
	{"p":[[720, -160594.393760, 0.200220, 0.003848, 0.042762],[718, -160594.393991, 0.200174, 0.000001, 0.042763],[719, -160594.394035, 0.200165, 0.000001, 0.042763],[721, -160595.063649, 0.102466, 0.001809, 0.039811],[732, -160595.232900, 0.086511, 0.000001, 0.039735],[733, -160595.259810, 0.084214, 0.160597, 0.039749],[717, -160595.912437, 0.043848, 0.000001, 0.042916]], "n":["SA_OTU163070"]},
	{"p":[[720, -160597.872391, 0.198707, 0.003848, 0.042717],[718, -160597.872621, 0.198661, 0.000001, 0.042718],[719, -160597.872666, 0.198652, 0.000001, 0.042718],[721, -160598.541633, 0.101757, 0.001809, 0.039769],[732, -160598.710866, 0.085915, 0.000001, 0.039693],[733, -160598.737817, 0.083630, 0.160597, 0.039708],[723, -160599.266671, 0.049282, 0.029888, 0.038639]], "n":["SA_OTU163663"]},
	{"p":[[432, -160548.467926, 0.344076, 0.006784, 0.003685],[433, -160548.515552, 0.328073, 0.000001, 0.003687],[434, -160548.516231, 0.327851, 0.016065, 0.003687]], "n":["SA_OTU22345"]},
	{"p":[[432, -160550.232520, 0.344074, 0.006786, 0.003686],[433, -160550.280133, 0.328075, 0.000001, 0.003687],[434, -160550.280816, 0.327851, 0.016065, 0.003687]], "n":["SA_OTU22027"]},
	{"p":[[693, -160640.961737, 0.939612, 0.042606, 0.086353],[710, -160643.872189, 0.051163, 0.076338, 0.082973]], "n":["SA_OTU11886"]},
	{"p":[[44, -160608.578735, 1.000000, 0.086810, 0.046949]], "n":["SA_OTU85189"]},
	{"p":[[432, -160550.232927, 0.344074, 0.006786, 0.003684],[433, -160550.280540, 0.328075, 0.000001, 0.003686],[434, -160550.281223, 0.327851, 0.016065, 0.003686]], "n":["SA_OTU41"]},
	{"p":[[17, -160583.301088, 0.333205, 0.000001, 0.023331],[18, -160583.301380, 0.333107, 0.000001, 0.023334],[19, -160583.301439, 0.333088, 0.011819, 0.023332]], "n":["SA_OTU12718"]},
	{"p":[[22, -160576.810946, 0.745603, 0.005143, 0.008330],[19, -160577.960025, 0.236303, 0.005912, 0.015255],[23, -160580.718212, 0.014983, 0.098169, 0.013897]], "n":["SA_OTU15543"]},
	{"p":[[17, -160583.621248, 0.333389, 0.000001, 0.023357],[18, -160583.621542, 0.333291, 0.000001, 0.023360],[19, -160583.621611, 0.333267, 0.011819, 0.023358]], "n":["SA_OTU139267"]},
	{"p":[[22, -160618.318383, 0.626268, 0.004418, 0.050945],[19, -160619.091466, 0.289078, 0.005187, 0.056721],[23, -160620.433868, 0.075512, 0.091687, 0.048388]], "n":["SA_OTU138798"]},
	{"p":[[19, -160628.326844, 0.828732, 0.006810, 0.061251],[22, -160631.034521, 0.055269, 0.000001, 0.060012],[23, -160631.146625, 0.049408, 0.099105, 0.060188],[17, -160631.541280, 0.033297, 0.000001, 0.070055],[18, -160631.541365, 0.033294, 0.000001, 0.070052]], "n":["SA_OTU138777"]},
	{"p":[[723, -160610.760504, 0.779576, 0.031721, 0.059500],[724, -160613.518604, 0.049435, 0.005029, 0.067103],[713, -160613.783699, 0.037923, 0.000001, 0.067077],[715, -160613.784445, 0.037895, 0.001140, 0.067077],[714, -160613.784484, 0.037893, 0.000001, 0.067077],[711, -160614.421096, 0.020049, 0.007990, 0.067110]], "n":["SA_OTU136059"]},
	{"p":[[718, -160551.563677, 0.820371, 0.002275, 0.003659],[719, -160553.222935, 0.156100, 0.000000, 0.003721],[720, -160555.920563, 0.010516, 0.003848, 0.007243]], "n":["SA_OTU140820"]},
	{"p":[[713, -160572.349709, 0.316302, 0.000001, 0.018252],[714, -160572.350479, 0.316058, 0.000001, 0.018252],[715, -160572.350515, 0.316047, 0.001140, 0.018252],[712, -160575.550606, 0.012882, 0.000001, 0.021425],[716, -160575.556698, 0.012803, 0.001273, 0.021468],[711, -160575.636787, 0.011818, 0.000001, 0.021736],[717, -160575.636873, 0.011817, 0.005282, 0.021738]], "n":["SA_OTU163157"]},
	{"p":[[713, -160580.923580, 0.313580, 0.000001, 0.021980],[714, -160580.924349, 0.313339, 0.000001, 0.021980],[715, -160580.925409, 0.313008, 0.001139, 0.021981],[712, -160583.975479, 0.014823, 0.000001, 0.025263],[716, -160583.979997, 0.014756, 0.001272, 0.025297],[711, -160584.049337, 0.013767, 0.000001, 0.025531],[717, -160584.049355, 0.013767, 0.005282, 0.025532]], "n":["SA_OTU165782"]},
	{"p":[[23, -160625.098728, 0.440176, 0.086871, 0.043548],[19, -160625.198048, 0.398558, 0.006102, 0.059161],[22, -160626.249584, 0.139256, 0.003189, 0.055000],[17, -160628.787551, 0.011005, 0.000001, 0.070072],[18, -160628.787629, 0.011004, 0.000001, 0.070069]], "n":["SA_OTU264794"]},
	{"p":[[44, -160606.433643, 1.000000, 0.086808, 0.046956]], "n":["SA_OTU156150"]},
	{"p":[[19, -160621.418677, 0.642592, 0.005807, 0.059156],[22, -160622.341319, 0.255409, 0.003223, 0.055441],[23, -160623.604949, 0.072185, 0.094288, 0.052925],[17, -160625.182349, 0.014907, 0.000001, 0.070306],[18, -160625.182427, 0.014906, 0.000001, 0.070304]], "n":["SA_OTU160151"]},
	{"p":[[902, -160705.843505, 0.500010, 0.017311, 0.209172],[25, -160706.729896, 0.206074, 0.032550, 0.210576],[903, -160706.926249, 0.169336, 0.120440, 0.214366],[11, -160707.850156, 0.067220, 0.008390, 0.207926],[24, -160708.128217, 0.050903, 0.000001, 0.216278]], "n":["SA_OTU203075"]},
	{"p":[[432, -160549.504843, 0.344072, 0.006786, 0.003698],[433, -160549.552453, 0.328075, 0.000001, 0.003699],[434, -160549.553132, 0.327852, 0.016065, 0.003699]], "n":["SA_OTU10850"]},
	{"p":[[432, -160549.506070, 0.344073, 0.006786, 0.003693],[433, -160549.553680, 0.328075, 0.000001, 0.003695],[434, -160549.554359, 0.327852, 0.016065, 0.003695]], "n":["SA_OTU15651"]},
	{"p":[[432, -160538.387453, 0.344176, 0.006807, 0.000001],[433, -160538.435516, 0.328024, 0.000001, 0.000001],[434, -160538.436201, 0.327800, 0.016065, 0.000001]], "n":["SA_OTU138378"]},
	{"p":[[432, -160538.386135, 0.340173, 0.005970, 0.000001],[433, -160538.416526, 0.329990, 0.000001, 0.000001],[434, -160538.416996, 0.329835, 0.016064, 0.000001]], "n":["SA_OTU5561"]},
	{"p":[[432, -160538.387453, 0.344176, 0.006807, 0.000001],[433, -160538.435517, 0.328024, 0.000001, 0.000001],[434, -160538.436201, 0.327800, 0.016065, 0.000001]], "n":["SA_OTU10943"]},
	{"p":[[44, -160597.790081, 1.000000, 0.081199, 0.037831]], "n":["SA_OTU126329"]},
	{"p":[[22, -160614.980887, 0.650766, 0.004509, 0.045617],[19, -160615.871492, 0.267079, 0.005026, 0.051403],[23, -160617.134809, 0.075507, 0.091757, 0.043162]], "n":["SA_OTU4619"]},
	{"p":[[19, -160559.606707, 0.366533, 0.010761, 0.005149],[17, -160559.752119, 0.316928, 0.000001, 0.006689],[18, -160559.753714, 0.316423, 0.000001, 0.006695]], "n":["SA_OTU6259"]},
	{"p":[[19, -160564.253471, 0.335575, 0.011482, 0.010306],[17, -160564.263148, 0.332343, 0.000001, 0.010812],[18, -160564.264191, 0.331996, 0.000001, 0.010817]], "n":["SA_OTU49188"]},
	{"p":[[17, -160574.063641, 0.333416, 0.000001, 0.019269],[18, -160574.064100, 0.333263, 0.000001, 0.019273],[19, -160574.064102, 0.333262, 0.011819, 0.019271]], "n":["SA_OTU52568"]},
	{"p":[[23, -160622.684441, 0.680877, 0.089984, 0.044510],[19, -160623.572071, 0.280270, 0.006660, 0.056282],[22, -160626.227542, 0.019693, 0.000001, 0.054858],[17, -160626.948146, 0.009580, 0.000001, 0.065371],[18, -160626.948181, 0.009580, 0.000001, 0.065368]], "n":["SA_OTU138999"]},
	{"p":[[17, -160580.132140, 0.333389, 0.000001, 0.023316],[18, -160580.132436, 0.333290, 0.000001, 0.023319],[19, -160580.132505, 0.333267, 0.011819, 0.023316]], "n":["SA_OTU139261"]},
	{"p":[[693, -160633.011954, 0.991512, 0.042514, 0.080857]], "n":["SA_OTU23234"]},
	{"p":[[769, -160555.029559, 1.000000, 0.016696, 0.007538]], "n":["SA_OTU41414"]},
	{"p":[[723, -160575.814418, 0.944998, 0.027027, 0.013812],[713, -160579.921204, 0.015555, 0.000001, 0.022199],[714, -160579.921976, 0.015543, 0.000001, 0.022199],[715, -160579.923035, 0.015527, 0.001139, 0.022200]], "n":["SA_OTU279231"]},
	{"p":[[713, -160575.048653, 0.996993, 0.068196, 0.018241]], "n":["SA_OTU183734"]},
	{"p":[[22, -160617.795865, 0.631451, 0.004423, 0.050610],[19, -160618.575831, 0.289471, 0.005177, 0.056352],[23, -160619.994313, 0.070075, 0.092342, 0.048606]], "n":["SA_OTU138855"]},
	{"p":[[17, -160574.373256, 0.333413, 0.000001, 0.019221],[19, -160574.373702, 0.333265, 0.011819, 0.019222],[18, -160574.373705, 0.333264, 0.000001, 0.019224]], "n":["SA_OTU139269"]},
	{"p":[[902, -160702.853894, 0.502218, 0.017348, 0.201388],[25, -160703.746859, 0.205628, 0.033012, 0.202755],[903, -160703.960367, 0.166095, 0.120440, 0.206569],[11, -160704.813258, 0.070787, 0.009627, 0.199454],[24, -160705.170952, 0.049500, 0.000001, 0.208713]], "n":["SA_OTU13829"]},
	{"p":[[711, -160595.777354, 0.485453, 0.009705, 0.046313],[713, -160597.009796, 0.141548, 0.000001, 0.050123],[715, -160597.010569, 0.141439, 0.001140, 0.050123],[714, -160597.010582, 0.141437, 0.000001, 0.050123],[723, -160598.241600, 0.041299, 0.032012, 0.051010],[712, -160599.343511, 0.013721, 0.000001, 0.053967],[716, -160599.345659, 0.013692, 0.001090, 0.053976]], "n":["SA_OTU140087"]},
	{"p":[[23, -160613.040117, 0.847036, 0.086888, 0.036667],[19, -160614.875867, 0.135097, 0.006400, 0.051200],[22, -160617.429493, 0.010510, 0.000001, 0.049547]], "n":["SA_OTU207349"]},
	{"p":[[23, -160607.277961, 1.000000, 0.053011, 0.026001]], "n":["SA_OTU246042"]},
	{"p":[[720, -160567.195877, 0.284169, 0.003848, 0.018804],[719, -160567.196152, 0.284091, 0.000001, 0.018805],[718, -160567.196174, 0.284085, 0.000001, 0.018805],[717, -160568.848075, 0.054455, 0.000001, 0.018984],[721, -160568.848821, 0.054414, 0.004704, 0.018985],[711, -160569.902413, 0.018973, 0.003246, 0.018789],[732, -160570.873191, 0.007187, 0.000001, 0.019309]], "n":["SA_OTU88349"]},
	{"p":[[432, -160593.145447, 0.343546, 0.006695, 0.022658],[433, -160593.190732, 0.328335, 0.000001, 0.022665],[434, -160593.191391, 0.328119, 0.016065, 0.022665]], "n":["SA_OTU22746"]},
	{"p":[[432, -160567.928151, 0.343824, 0.006749, 0.011227],[433, -160567.974846, 0.328138, 0.000001, 0.011230],[434, -160567.975150, 0.328038, 0.016066, 0.011230]], "n":["SA_OTU138439"]},
	{"p":[[44, -160588.798728, 0.999982, 0.065489, 0.023725]], "n":["SA_OTU161121"]},
	{"p":[[44, -160584.748673, 1.000000, 0.082663, 0.020744]], "n":["SA_OTU161193"]},
	{"p":[[44, -160601.495346, 1.000000, 0.085574, 0.036663]], "n":["SA_OTU85178"]},
	{"p":[[44, -160601.033033, 1.000000, 0.085572, 0.036685]], "n":["SA_OTU85339"]},
	{"p":[[19, -160595.647183, 0.444500, 0.003812, 0.036817],[23, -160595.705497, 0.419321, 0.092415, 0.030095],[22, -160596.833979, 0.135660, 0.000001, 0.036412]], "n":["SA_OTU819"]},
	{"p":[[23, -160618.812116, 0.694581, 0.089643, 0.043993],[19, -160619.763380, 0.268284, 0.006656, 0.056180],[22, -160622.417761, 0.018872, 0.000001, 0.054757],[17, -160623.143661, 0.009132, 0.000001, 0.065264],[18, -160623.143698, 0.009131, 0.000001, 0.065261]], "n":["SA_OTU52060"]},
	{"p":[[17, -160569.082496, 0.333455, 0.000001, 0.015165],[19, -160569.083120, 0.333247, 0.011819, 0.015169],[18, -160569.083175, 0.333229, 0.000001, 0.015169]], "n":["SA_OTU52405"]},
	{"p":[[17, -160565.302891, 0.333224, 0.000001, 0.015242],[19, -160565.303511, 0.333017, 0.011819, 0.015245],[18, -160565.303583, 0.332994, 0.000001, 0.015246]], "n":["SA_OTU4853"]},
	{"p":[[723, -160570.412829, 0.961357, 0.025975, 0.009962],[724, -160573.644012, 0.037984, 0.006641, 0.013036]], "n":["SA_OTU4439"]},
	{"p":[[19, -160617.560695, 0.839092, 0.006595, 0.051770],[22, -160620.227644, 0.058287, 0.000001, 0.050423],[23, -160620.337203, 0.052238, 0.098341, 0.049671],[18, -160621.066480, 0.025192, 0.000001, 0.060923],[17, -160621.066501, 0.025192, 0.000001, 0.060927]], "n":["SA_OTU22435"]},
	{"p":[[718, -160576.789235, 0.762764, 0.002275, 0.018382],[719, -160578.380950, 0.155281, 0.000000, 0.018700],[720, -160579.842663, 0.036000, 0.003847, 0.022105],[712, -160581.251193, 0.008802, 0.000614, 0.022316],[715, -160581.255529, 0.008764, 0.000002, 0.022318],[716, -160581.255708, 0.008762, 0.000668, 0.022315],[717, -160581.257870, 0.008744, 0.005282, 0.022312]], "n":["SA_OTU139355"]},
	{"p":[[17, -160571.581174, 0.333456, 0.000001, 0.015175],[19, -160571.581800, 0.333247, 0.011819, 0.015179],[18, -160571.581853, 0.333230, 0.000001, 0.015179]], "n":["SA_OTU51945"]},
	{"p":[[717, -160560.338839, 0.298150, 0.000001, 0.010881],[720, -160560.338878, 0.298139, 0.000001, 0.010881],[721, -160560.339513, 0.297950, 0.004704, 0.010881],[732, -160562.381256, 0.038675, 0.000001, 0.011018],[733, -160562.571646, 0.031970, 0.160597, 0.011072],[716, -160563.907882, 0.008403, 0.000001, 0.013729],[711, -160563.928850, 0.008228, 0.000001, 0.013869]], "n":["SA_OTU23026"]},
	{"p":[[19, -160618.873796, 0.839128, 0.006599, 0.051859],[22, -160621.541729, 0.058232, 0.000001, 0.050513],[23, -160621.653982, 0.052049, 0.098505, 0.049955],[18, -160622.375511, 0.025296, 0.000001, 0.061016],[17, -160622.375528, 0.025296, 0.000001, 0.061020]], "n":["SA_OTU138786"]},
	{"p":[[19, -160612.456662, 0.746023, 0.006541, 0.051537],[23, -160614.017547, 0.156628, 0.090598, 0.040431],[22, -160615.086427, 0.053785, 0.000001, 0.050057],[18, -160615.990311, 0.021783, 0.000001, 0.060836],[17, -160615.990336, 0.021782, 0.000001, 0.060840]], "n":["SA_OTU138750"]},
	{"p":[[718, -160584.200080, 0.763304, 0.002275, 0.018252],[719, -160585.792472, 0.155285, 0.000000, 0.018566],[720, -160587.260548, 0.035773, 0.003847, 0.021948],[712, -160588.669481, 0.008743, 0.000614, 0.022157],[715, -160588.673810, 0.008705, 0.000002, 0.022159],[716, -160588.673996, 0.008704, 0.000668, 0.022156],[717, -160588.676147, 0.008685, 0.005282, 0.022153]], "n":["SA_OTU140943"]},
	{"p":[[19, -160618.342472, 0.839076, 0.006601, 0.051920],[22, -160621.010878, 0.058201, 0.000001, 0.050573],[23, -160621.123095, 0.052023, 0.098509, 0.050020],[18, -160621.841979, 0.025350, 0.000001, 0.061084],[17, -160621.841998, 0.025350, 0.000001, 0.061088]], "n":["SA_OTU52078"]},
	{"p":[[17, -160566.307478, 0.333458, 0.000001, 0.015175],[19, -160566.308114, 0.333246, 0.011819, 0.015179],[18, -160566.308163, 0.333229, 0.000001, 0.015179]], "n":["SA_OTU139296"]},
	{"p":[[713, -160557.629429, 0.324795, 0.000001, 0.007218],[714, -160557.630193, 0.324547, 0.000001, 0.007218],[715, -160557.630246, 0.324530, 0.001140, 0.007218],[712, -160561.474724, 0.006944, 0.000001, 0.009727],[716, -160561.497943, 0.006785, 0.001273, 0.009869],[711, -160561.651672, 0.005818, 0.000001, 0.010364],[717, -160561.652486, 0.005813, 0.005282, 0.010370]], "n":["SA_OTU59248"]},
	{"p":[[693, -160631.116955, 0.991625, 0.042518, 0.080513]], "n":["SA_OTU149947"]},
	{"p":[[17, -160572.583631, 0.333414, 0.000001, 0.019266],[19, -160572.584082, 0.333264, 0.011819, 0.019268],[18, -160572.584083, 0.333264, 0.000001, 0.019270]], "n":["SA_OTU139276"]},
	{"p":[[713, -160562.021700, 0.322062, 0.000001, 0.010867],[714, -160562.022472, 0.321814, 0.000001, 0.010868],[715, -160562.023569, 0.321461, 0.001139, 0.010868],[712, -160565.605229, 0.008946, 0.000001, 0.013693],[716, -160565.618644, 0.008827, 0.001273, 0.013781],[711, -160565.735660, 0.007852, 0.000001, 0.014165],[717, -160565.736097, 0.007849, 0.005282, 0.014169]], "n":["SA_OTU161975"]},
	{"p":[[902, -160707.521222, 0.504691, 0.015441, 0.213367],[25, -160708.452350, 0.198903, 0.020176, 0.218799],[903, -160708.530308, 0.183986, 0.120440, 0.220654],[11, -160709.875282, 0.047937, 0.009812, 0.218833],[24, -160710.188700, 0.035039, 0.000001, 0.228131],[424, -160711.889897, 0.006393, 0.014501, 0.258746]], "n":["SA_OTU2050"]},
	{"p":[[720, -160583.483905, 0.180178, 0.003848, 0.030730],[719, -160583.484193, 0.180126, 0.000001, 0.030731],[718, -160583.484204, 0.180124, 0.000001, 0.030731],[721, -160583.887596, 0.120332, 0.001694, 0.027515],[732, -160584.051239, 0.102167, 0.000001, 0.027462],[733, -160584.079504, 0.099320, 0.160597, 0.027474],[723, -160584.485212, 0.066197, 0.028976, 0.025652]], "n":["SA_OTU2481"]},
	{"p":[[19, -160595.674430, 0.443568, 0.003810, 0.036690],[23, -160595.727827, 0.420504, 0.092403, 0.029981],[22, -160596.860923, 0.135417, 0.000001, 0.036286]], "n":["SA_OTU53029"]},
	{"p":[[23, -160638.899228, 1.000000, 0.049529, 0.050079]], "n":["SA_OTU239361"]},
	{"p":[[14, -160576.410909, 0.999970, 0.033693, 0.017692]], "n":["SA_OTU227175"]},
	{"p":[[715, -160551.517526, 0.043491, 0.000571, 0.040683],[712, -160551.517526, 0.043491, 0.000590, 0.040683],[716, -160551.517526, 0.043491, 0.000637, 0.040683],[718, -160551.517528, 0.043491, 0.001138, 0.040683],[728, -160551.517529, 0.043491, 0.001321, 0.040683],[720, -160551.517533, 0.043491, 0.001924, 0.040682],[729, -160551.517534, 0.043491, 0.002084, 0.040682]], "n":["SA_OTU87522"]},
	{"p":[[718, -160572.501774, 0.776936, 0.002275, 0.014650],[719, -160574.110698, 0.155467, 0.000000, 0.014902],[720, -160575.758308, 0.029929, 0.003848, 0.018339]], "n":["SA_OTU12716"]},
	{"p":[[851, -160565.603657, 1.000000, 0.017278, 0.009189]], "n":["SA_OTU9156"]},
	{"p":[[718, -160569.304930, 0.776927, 0.002275, 0.014649],[719, -160570.913776, 0.155478, 0.000000, 0.014901],[720, -160572.561475, 0.029928, 0.003848, 0.018339]], "n":["SA_OTU139413"]},
	{"p":[[718, -160574.685337, 0.762853, 0.002275, 0.018359],[719, -160576.277119, 0.155288, 0.000000, 0.018677],[720, -160577.740006, 0.035960, 0.003847, 0.022077],[712, -160579.148596, 0.008792, 0.000614, 0.022287],[715, -160579.152942, 0.008754, 0.000002, 0.022290],[716, -160579.153108, 0.008752, 0.000668, 0.022287],[717, -160579.155281, 0.008733, 0.005282, 0.022284]], "n":["SA_OTU51810"]},
	{"p":[[44, -160586.721464, 0.999987, 0.065041, 0.018736]], "n":["SA_OTU161126"]},
	{"p":[[481, -160557.078136, 0.332350, 0.000001, 0.007247],[482, -160557.078542, 0.332216, 0.000001, 0.007247],[483, -160557.078752, 0.332146, 0.009108, 0.007247]], "n":["SA_OTU136534"]},
	{"p":[[19, -160609.158863, 0.841894, 0.006469, 0.046976],[22, -160611.797228, 0.060177, 0.000001, 0.045585],[23, -160611.878007, 0.055507, 0.097377, 0.043714],[18, -160612.839953, 0.021212, 0.000001, 0.056345],[17, -160612.840054, 0.021210, 0.000001, 0.056351]], "n":["SA_OTU52075"]},
	{"p":[[19, -160611.700867, 0.842212, 0.006473, 0.047062],[22, -160614.340411, 0.060129, 0.000001, 0.045670],[23, -160614.429075, 0.055027, 0.097587, 0.044042],[18, -160615.377384, 0.021317, 0.000001, 0.056434],[17, -160615.377483, 0.021315, 0.000001, 0.056440]], "n":["SA_OTU52074"]},
	{"p":[[19, -160612.776460, 0.841318, 0.006475, 0.047132],[22, -160615.416145, 0.060056, 0.000001, 0.045739],[23, -160615.487607, 0.055914, 0.097144, 0.043587],[18, -160616.450075, 0.021356, 0.000001, 0.056514],[17, -160616.450170, 0.021354, 0.000001, 0.056519]], "n":["SA_OTU52073"]},
	{"p":[[19, -160611.486907, 0.842204, 0.006473, 0.047062],[22, -160614.126340, 0.060135, 0.000001, 0.045671],[23, -160614.215085, 0.055028, 0.097587, 0.044043],[18, -160615.163410, 0.021317, 0.000001, 0.056434],[17, -160615.163508, 0.021315, 0.000001, 0.056440]], "n":["SA_OTU138793"]},
	{"p":[[19, -160615.420933, 0.839157, 0.006599, 0.051843],[22, -160618.089016, 0.058225, 0.000001, 0.050498],[23, -160618.200859, 0.052064, 0.098482, 0.049913],[18, -160618.923419, 0.025277, 0.000001, 0.060998],[17, -160618.923439, 0.025277, 0.000001, 0.061002]], "n":["SA_OTU52072"]},
	{"p":[[19, -160610.516531, 0.841875, 0.006471, 0.047050],[22, -160613.155255, 0.060154, 0.000001, 0.045656],[23, -160613.237348, 0.055413, 0.097409, 0.043820],[18, -160614.194384, 0.021280, 0.000001, 0.056428],[17, -160614.194483, 0.021278, 0.000001, 0.056433]], "n":["SA_OTU52057"]},
	{"p":[[717, -160546.016812, 0.301321, 0.000001, 0.003596],[720, -160546.016848, 0.301310, 0.000001, 0.003596],[721, -160546.017005, 0.301263, 0.004705, 0.003596],[733, -160548.004518, 0.041284, 0.157013, 0.000001],[732, -160548.079344, 0.038307, 0.000001, 0.003557],[716, -160550.204677, 0.004574, 0.000001, 0.005496],[711, -160550.283198, 0.004228, 0.000001, 0.005920]], "n":["SA_OTU179570"]},
	{"p":[[19, -160624.645598, 0.834325, 0.006709, 0.056376],[22, -160627.337436, 0.056531, 0.000001, 0.055092],[23, -160627.443055, 0.050864, 0.098232, 0.054266],[17, -160628.000086, 0.029141, 0.000001, 0.065313],[18, -160628.000120, 0.029140, 0.000001, 0.065310]], "n":["SA_OTU142359"]},
	{"p":[[23, -160631.091803, 1.000000, 0.047201, 0.045355]], "n":["SA_OTU140555"]},
	{"p":[[720, -160569.081495, 0.327767, 0.003848, 0.014727],[718, -160569.081662, 0.327712, 0.000001, 0.014727],[719, -160569.081685, 0.327705, 0.000001, 0.014727],[717, -160573.166848, 0.005512, 0.000001, 0.016737],[721, -160573.181919, 0.005430, 0.004705, 0.016801]], "n":["SA_OTU169906"]},
	{"p":[[19, -160554.507258, 0.363787, 0.010802, 0.005307],[17, -160554.640828, 0.318301, 0.000001, 0.006846],[18, -160554.642396, 0.317803, 0.000001, 0.006851]], "n":["SA_OTU263"]},
	{"p":[[721, -160585.437183, 0.233993, 0.001665, 0.031303],[732, -160585.596191, 0.199594, 0.000001, 0.031243],[733, -160585.621845, 0.194539, 0.160597, 0.031255],[723, -160586.028515, 0.129536, 0.029095, 0.029578],[720, -160586.477310, 0.082696, 0.000001, 0.034430],[717, -160586.477370, 0.082691, 0.000001, 0.034432],[711, -160586.901515, 0.054107, 0.005589, 0.034775]], "n":["SA_OTU2758"]},
	{"p":[[724, -160554.653738, 0.991587, 0.014835, 0.003655]], "n":["SA_OTU2712"]},
	{"p":[[713, -160551.581119, 0.327679, 0.000001, 0.003598],[714, -160551.581879, 0.327431, 0.000001, 0.003598],[715, -160551.581937, 0.327412, 0.001140, 0.003598],[712, -160555.779473, 0.004922, 0.000001, 0.005497],[716, -160555.828863, 0.004685, 0.001273, 0.005757],[711, -160556.057865, 0.003726, 0.000001, 0.006472],[717, -160556.059904, 0.003718, 0.005282, 0.006486]], "n":["SA_OTU2952"]},
	{"p":[[19, -160602.391801, 0.842783, 0.006342, 0.042427],[22, -160604.999348, 0.062126, 0.000001, 0.040997],[23, -160605.037884, 0.059777, 0.096654, 0.038310],[18, -160606.257272, 0.017659, 0.000001, 0.052063],[17, -160606.257468, 0.017655, 0.000001, 0.052069]], "n":["SA_OTU52079"]},
	{"p":[[19, -160603.920088, 0.842799, 0.006338, 0.042300],[22, -160606.527169, 0.062156, 0.000001, 0.040874],[23, -160606.563369, 0.059946, 0.096623, 0.038158],[18, -160607.791707, 0.017551, 0.000001, 0.051918],[17, -160607.791911, 0.017547, 0.000001, 0.051924]], "n":["SA_OTU22495"]},
	{"p":[[19, -160602.860909, 0.842602, 0.006337, 0.042290],[22, -160605.467623, 0.062164, 0.000001, 0.040865],[23, -160605.500258, 0.060168, 0.096557, 0.038073],[18, -160606.733238, 0.017534, 0.000001, 0.051908],[17, -160606.733438, 0.017531, 0.000001, 0.051915]], "n":["SA_OTU138785"]},
	{"p":[[19, -160602.765594, 0.842601, 0.006338, 0.042316],[22, -160605.372629, 0.062144, 0.000001, 0.040890],[23, -160605.405301, 0.060147, 0.096557, 0.038096],[18, -160606.636712, 0.017556, 0.000001, 0.051938],[17, -160606.636913, 0.017552, 0.000001, 0.051945]], "n":["SA_OTU12754"]},
	{"p":[[852, -160580.818759, 0.333438, 0.000585, 0.021064],[854, -160580.818957, 0.333372, 0.029650, 0.021064],[853, -160580.819501, 0.333190, 0.000001, 0.021064]], "n":["SA_OTU156108"]},
	{"p":[[852, -160562.834826, 0.333438, 0.000585, 0.012565],[854, -160562.835026, 0.333371, 0.029650, 0.012565],[853, -160562.835569, 0.333191, 0.000001, 0.012565]], "n":["SA_OTU49026"]},
	{"p":[[19, -160604.708201, 0.842819, 0.006338, 0.042295],[22, -160607.314710, 0.062193, 0.000001, 0.040868],[23, -160607.352418, 0.059892, 0.096646, 0.038180],[18, -160608.579916, 0.017550, 0.000001, 0.051910],[17, -160608.580116, 0.017546, 0.000001, 0.051917]], "n":["SA_OTU52044"]},
	{"p":[[19, -160606.471698, 0.842829, 0.006338, 0.042301],[22, -160609.078344, 0.062185, 0.000001, 0.040874],[23, -160609.116134, 0.059879, 0.096649, 0.038188],[18, -160610.343124, 0.017555, 0.000001, 0.051917],[17, -160610.343325, 0.017551, 0.000001, 0.051924]], "n":["SA_OTU52045"]},
	{"p":[[19, -160554.506672, 0.363748, 0.010802, 0.005310],[17, -160554.640071, 0.318321, 0.000001, 0.006849],[18, -160554.641639, 0.317822, 0.000001, 0.006855]], "n":["SA_OTU139281"]},
	{"p":[[718, -160568.022092, 0.777460, 0.002275, 0.014523],[719, -160569.631489, 0.155498, 0.000000, 0.014771],[720, -160571.287201, 0.029693, 0.003848, 0.018180]], "n":["SA_OTU162393"]},
	{"p":[[719, -160553.255240, 0.329335, 0.000001, 0.007318],[718, -160553.255271, 0.329325, 0.000001, 0.007318],[720, -160553.255281, 0.329322, 0.003847, 0.007318],[717, -160557.627156, 0.004159, 0.000001, 0.008608],[721, -160557.654409, 0.004047, 0.004705, 0.008686]], "n":["SA_OTU170952"]},
	{"p":[[19, -160554.511193, 0.364051, 0.010799, 0.005286],[17, -160554.645903, 0.318170, 0.000001, 0.006824],[18, -160554.647475, 0.317670, 0.000001, 0.006829]], "n":["SA_OTU15589"]},
	{"p":[[14, -160579.440747, 1.000000, 0.044681, 0.019034]], "n":["SA_OTU148191"]},
	{"p":[[44, -160584.761034, 1.000000, 0.082648, 0.020676]], "n":["SA_OTU522"]},
	{"p":[[44, -160588.289016, 1.000000, 0.083737, 0.025984]], "n":["SA_OTU161102"]},
	{"p":[[44, -160595.544774, 1.000000, 0.084727, 0.031318]], "n":["SA_OTU22973"]},
	{"p":[[19, -160552.170125, 0.364002, 0.010800, 0.005291],[17, -160552.304620, 0.318195, 0.000001, 0.006829],[18, -160552.306196, 0.317694, 0.000001, 0.006835]], "n":["SA_OTU52015"]},
	{"p":[[723, -160586.520947, 0.912709, 0.029172, 0.033318],[724, -160590.177612, 0.023565, 0.004727, 0.040434],[713, -160590.522526, 0.016690, 0.000001, 0.042256],[715, -160590.523309, 0.016677, 0.001140, 0.042256],[714, -160590.523310, 0.016677, 0.000001, 0.042256]], "n":["SA_OTU2521"]},
	{"p":[[44, -160584.776478, 1.000000, 0.082629, 0.020591]], "n":["SA_OTU48773"]},
	{"p":[[19, -160592.880011, 0.831639, 0.006033, 0.032824],[23, -160595.217455, 0.080315, 0.094499, 0.026360],[22, -160595.407262, 0.066430, 0.000001, 0.031363],[18, -160597.222816, 0.010811, 0.000001, 0.043050],[17, -160597.223350, 0.010806, 0.000001, 0.043060]], "n":["SA_OTU97"]},
	{"p":[[19, -160591.109485, 0.831679, 0.006034, 0.032851],[23, -160593.447867, 0.080243, 0.094503, 0.026386],[22, -160593.636909, 0.066422, 0.000001, 0.031389],[18, -160595.450510, 0.010831, 0.000001, 0.043083],[17, -160595.451042, 0.010825, 0.000001, 0.043093]], "n":["SA_OTU52080"]},
	{"p":[[718, -160551.582344, 0.820747, 0.002275, 0.003591],[719, -160553.241912, 0.156124, 0.000000, 0.003651],[720, -160555.957463, 0.010330, 0.003848, 0.007106]], "n":["SA_OTU391"]},
	{"p":[[852, -160550.097735, 0.333437, 0.000585, 0.004151],[854, -160550.097932, 0.333372, 0.029650, 0.004151],[853, -160550.098472, 0.333191, 0.000001, 0.004151]], "n":["SA_OTU2315"]},
	{"p":[[724, -160544.663157, 0.999995, 0.020108, 0.000001]], "n":["SA_OTU1980"]},
	{"p":[[723, -160551.615129, 0.999994, 0.038580, 0.003582]], "n":["SA_OTU6167"]},
	{"p":[[16, -160653.058520, 0.790662, 0.042166, 0.088475],[23, -160655.098507, 0.102810, 0.000001, 0.093181],[24, -160655.276424, 0.086053, 0.040004, 0.094097],[11, -160657.442888, 0.009860, 0.000001, 0.087493],[25, -160657.458715, 0.009705, 0.092847, 0.087507]], "n":["SA_OTU6183"]},
	{"p":[[21, -160563.497190, 0.896042, 0.015993, 0.004131],[20, -160566.341848, 0.052109, 0.000001, 0.006607],[22, -160566.346828, 0.051850, 0.024388, 0.006576]], "n":["SA_OTU50370"]},
	{"p":[[19, -160592.876386, 0.831675, 0.006034, 0.032841],[23, -160595.214543, 0.080261, 0.094503, 0.026377],[22, -160595.403798, 0.066422, 0.000001, 0.031380],[18, -160597.218062, 0.010824, 0.000001, 0.043071],[17, -160597.218595, 0.010818, 0.000001, 0.043081]], "n":["SA_OTU52082"]},
	{"p":[[713, -160551.620230, 0.999715, 0.068195, 0.003595]], "n":["SA_OTU15803"]},
	{"p":[[19, -160569.203187, 0.628347, 0.003483, 0.009228],[22, -160570.367104, 0.196208, 0.000001, 0.009079],[23, -160570.479146, 0.175411, 0.099103, 0.009108]], "n":["SA_OTU134553"]},
	{"p":[[902, -160715.072167, 0.653412, 0.021922, 0.237073],[903, -160716.505647, 0.155824, 0.120440, 0.247382],[25, -160716.537424, 0.150950, 0.000001, 0.247688],[11, -160719.057631, 0.012143, 0.007480, 0.255404],[24, -160719.216988, 0.010354, 0.000001, 0.262495]], "n":["SA_OTU3697"]},
	{"p":[[14, -160557.788994, 1.000000, 0.044681, 0.007526]], "n":["SA_OTU54526"]},
	{"p":[[19, -160584.144134, 0.813199, 0.005858, 0.028054],[23, -160586.212260, 0.102807, 0.093120, 0.020131],[22, -160586.622089, 0.068239, 0.000001, 0.026595]], "n":["SA_OTU52050"]},
	{"p":[[718, -160539.711417, 0.836416, 0.002275, 0.000001],[719, -160541.387355, 0.156521, 0.000000, 0.000001]], "n":["SA_OTU140793"]},
	{"p":[[23, -160607.628115, 1.000000, 0.046076, 0.027238]], "n":["SA_OTU14914"]},
	{"p":[[17, -160642.484563, 0.330680, 0.000001, 0.133920],[18, -160642.484577, 0.330675, 0.000001, 0.133920],[19, -160642.484600, 0.330668, 0.011819, 0.133918],[23, -160646.847524, 0.004213, 0.095277, 0.129650],[22, -160646.960049, 0.003765, 0.000001, 0.134277]], "n":["SA_OTU52071"]},
	{"p":[[713, -160549.280691, 0.999715, 0.068195, 0.003594]], "n":["SA_OTU136190"]},
	{"p":[[19, -160607.171114, 0.842815, 0.006350, 0.042719],[22, -160609.780708, 0.062001, 0.000001, 0.041281],[23, -160609.824132, 0.059366, 0.096729, 0.038658],[18, -160611.022478, 0.017910, 0.000001, 0.052401],[17, -160611.022667, 0.017907, 0.000001, 0.052407]], "n":["SA_OTU138742"]},
	{"p":[[19, -160584.128447, 0.813536, 0.005861, 0.028130],[23, -160586.200986, 0.102396, 0.093137, 0.020204],[22, -160586.607219, 0.068212, 0.000001, 0.026666]], "n":["SA_OTU138744"]},
	{"p":[[19, -160629.124264, 0.834085, 0.006720, 0.056823],[22, -160631.817860, 0.056415, 0.000001, 0.055533],[23, -160631.931625, 0.050349, 0.099105, 0.055699],[17, -160632.463627, 0.029576, 0.000001, 0.065808],[18, -160632.463671, 0.029575, 0.000001, 0.065805]], "n":["SA_OTU138743"]},
	{"p":[[119, -160553.169502, 0.276103, 0.021633, 0.028234],[118, -160553.170414, 0.275851, 0.000001, 0.028238],[117, -160553.170738, 0.275762, 0.000001, 0.028243],[140, -160553.967094, 0.124360, 0.022685, 0.028341]], "n":["TO_OTU2091"]},
	{"p":[[205, -160550.879508, 0.930870, 0.024226, 0.012771],[201, -160553.537117, 0.065269, 0.054982, 0.001294]], "n":["TO_OTU4956"]},
	{"p":[[349, -160553.053632, 0.107654, 0.005834, 0.024537],[337, -160553.064148, 0.106528, 0.005471, 0.021457],[354, -160553.217031, 0.091426, 0.000888, 0.029242],[355, -160553.217169, 0.091413, 0.003314, 0.029251],[356, -160553.218038, 0.091334, 0.007530, 0.029241],[357, -160553.221236, 0.091042, 0.010828, 0.029291],[352, -160553.246305, 0.088788, 0.001968, 0.029270]], "n":["TO_OTU5366"]},
	{"p":[[119, -160558.845936, 0.175225, 0.016143, 0.033367],[118, -160558.892318, 0.167284, 0.006379, 0.034443],[140, -160558.946670, 0.158434, 0.017206, 0.038833],[117, -160559.158203, 0.128227, 0.000001, 0.035788],[135, -160560.584838, 0.030789, 0.010783, 0.040668],[142, -160561.223200, 0.016262, 0.006762, 0.049451],[141, -160561.233140, 0.016101, 0.001856, 0.049316]], "n":["TO_OTU6125"]},
	{"p":[[750, -160545.871185, 0.601919, 0.006836, 0.010086],[757, -160548.365765, 0.049677, 0.004855, 0.020726],[758, -160548.365921, 0.049669, 0.001070, 0.020748],[759, -160548.365939, 0.049668, 0.000844, 0.020749],[756, -160548.366371, 0.049647, 0.000737, 0.020749],[760, -160548.366372, 0.049647, 0.025745, 0.020750],[751, -160548.366640, 0.049634, 0.000001, 0.020749]], "n":["TO_OTU7729"]},
	{"p":[[362, -160549.473329, 0.358138, 0.006993, 0.020706],[357, -160550.648056, 0.110630, 0.000001, 0.028710],[363, -160550.648436, 0.110588, 0.004785, 0.028718],[364, -160550.801472, 0.094895, 0.006494, 0.029344],[334, -160550.801836, 0.094861, 0.000001, 0.029356],[332, -160551.865358, 0.032750, 0.000001, 0.022366],[333, -160551.891794, 0.031895, 0.000001, 0.022429]], "n":["TO_OTU9835"]},
	{"p":[[201, -160548.698511, 0.598975, 0.029200, 0.003647],[203, -160550.122581, 0.144193, 0.009498, 0.022558],[204, -160550.842910, 0.070163, 0.008103, 0.023241],[200, -160550.865375, 0.068604, 0.000001, 0.022433],[202, -160550.884914, 0.067277, 0.012151, 0.022774],[206, -160552.025580, 0.021502, 0.006036, 0.019347],[207, -160552.975523, 0.008316, 0.032157, 0.025869]], "n":["TO_OTU10647"]},
	{"p":[[742, -160546.139440, 0.142783, 0.005529, 0.010137],[747, -160546.248704, 0.128004, 0.000001, 0.010276],[748, -160546.254092, 0.127317, 0.003649, 0.010282],[738, -160546.342644, 0.116527, 0.007448, 0.009988],[761, -160546.363720, 0.114097, 0.000001, 0.010174],[762, -160546.364865, 0.113966, 0.178147, 0.010171],[741, -160546.630613, 0.087370, 0.000001, 0.010329]], "n":["TO_OTU10689"]},
	{"p":[[198, -160559.811775, 0.346162, 0.018888, 0.045204],[186, -160560.256404, 0.221912, 0.000001, 0.048052],[197, -160560.267197, 0.219529, 0.000001, 0.048094],[208, -160561.518286, 0.062828, 0.065365, 0.052676],[207, -160561.522898, 0.062539, 0.002936, 0.053207],[206, -160562.111585, 0.034712, 0.000001, 0.064835],[199, -160562.152239, 0.033330, 0.015048, 0.065241]], "n":["TO_OTU11847"]},
	{"p":[[201, -160558.621988, 0.915987, 0.082648, 0.022345],[205, -160561.173624, 0.071405, 0.023788, 0.052872]], "n":["TO_OTU12818"]},
	{"p":[[205, -160554.560964, 0.533391, 0.017031, 0.020823],[201, -160554.820795, 0.411341, 0.047407, 0.009565],[202, -160558.526434, 0.010113, 0.017839, 0.058745],[200, -160558.563861, 0.009741, 0.014251, 0.059191],[203, -160558.622767, 0.009184, 0.000001, 0.060334],[204, -160558.623291, 0.009179, 0.008103, 0.060347],[206, -160558.904350, 0.006930, 0.006214, 0.051346]], "n":["TO_OTU14608"]},
	{"p":[[205, -160564.103791, 0.318898, 0.013333, 0.048457],[203, -160565.040022, 0.125041, 0.000001, 0.071805],[204, -160565.040246, 0.125013, 0.008102, 0.071807],[202, -160565.049392, 0.123875, 0.010411, 0.071703],[201, -160565.058043, 0.122808, 0.000001, 0.071797],[200, -160565.073433, 0.120932, 0.022616, 0.071917],[206, -160566.172827, 0.040279, 0.012001, 0.070636]], "n":["TO_OTU15872"]},
	{"p":[[744, -160550.772706, 0.576946, 0.031359, 0.018848],[747, -160551.827632, 0.200903, 0.008212, 0.021279],[746, -160552.859129, 0.071617, 0.000001, 0.025132],[743, -160552.886808, 0.069661, 0.000001, 0.025466],[745, -160553.410314, 0.041270, 0.000001, 0.029686],[748, -160555.111837, 0.007528, 0.003650, 0.030082],[742, -160555.130887, 0.007386, 0.000001, 0.030296]], "n":["TO_OTU16187"]},
	{"p":[[205, -160550.879508, 0.930870, 0.024226, 0.012771],[201, -160553.537117, 0.065269, 0.054982, 0.001294]], "n":["TO_OTU19281"]},
	{"p":[[406, -160580.072779, 0.216055, 0.114185, 0.108490],[393, -160580.221785, 0.186145, 0.034173, 0.135046],[900, -160580.281154, 0.175416, 0.024270, 0.073286],[785, -160581.221439, 0.068503, 0.003800, 0.096495],[901, -160581.376314, 0.058674, 0.082827, 0.096103],[422, -160582.314384, 0.022964, 0.025237, 0.149219],[421, -160582.320153, 0.022832, 0.000001, 0.149356]], "n":["TO_OTU20362"]},
	{"p":[[205, -160556.046333, 0.950866, 0.026803, 0.032286],[201, -160559.303896, 0.036591, 0.049131, 0.035141]], "n":["TO_OTU20609"]},
	{"p":[[188, -160543.521147, 0.645492, 0.059203, 0.010436],[193, -160544.890466, 0.164136, 0.000001, 0.010352],[194, -160544.900546, 0.162489, 0.031571, 0.010362],[192, -160547.355261, 0.013956, 0.000001, 0.012326],[189, -160547.361298, 0.013872, 0.000001, 0.012350]], "n":["TO_OTU21954"]},
	{"p":[[436, -160538.386048, 0.379024, 0.008844, 0.000001],[435, -160538.654984, 0.289647, 0.000001, 0.000001],[437, -160538.672124, 0.284725, 0.004550, 0.000001],[434, -160541.161041, 0.023632, 0.000001, 0.000001],[438, -160541.189435, 0.022971, 0.039651, 0.000001]], "n":["TO_OTU22346"]},
	{"p":[[201, -160558.992337, 0.375432, 0.033842, 0.045921],[205, -160559.847770, 0.159596, 0.012322, 0.054333],[202, -160560.234993, 0.108356, 0.014702, 0.076509],[200, -160560.242403, 0.107556, 0.019649, 0.076569],[203, -160560.281751, 0.103406, 0.000001, 0.077425],[204, -160560.281929, 0.103388, 0.008103, 0.077428],[206, -160561.472449, 0.031436, 0.012001, 0.077103]], "n":["TO_OTU22567"]},
	{"p":[[197, -160567.190036, 0.151073, 0.013874, 0.097995],[208, -160567.333779, 0.130845, 0.065365, 0.116013],[207, -160567.334369, 0.130768, 0.000001, 0.116007],[198, -160567.340490, 0.129970, 0.003061, 0.114603],[186, -160567.826615, 0.079932, 0.004181, 0.104174],[199, -160568.212442, 0.054345, 0.023078, 0.127211],[206, -160568.267766, 0.051420, 0.000001, 0.126259]], "n":["TO_OTU23360"]},
	{"p":[[212, -160553.712431, 0.342692, 0.008787, 0.019217],[210, -160554.682352, 0.129919, 0.009779, 0.020976],[222, -160555.260415, 0.072882, 0.009579, 0.028298],[221, -160555.262772, 0.072711, 0.000001, 0.028314],[208, -160555.381543, 0.064568, 0.000001, 0.028666],[209, -160555.381591, 0.064565, 0.025598, 0.028666],[185, -160555.422886, 0.061953, 0.006902, 0.028555]], "n":["TO_OTU24221"]},
	{"p":[[743, -160545.022785, 0.882390, 0.021444, 0.000001],[747, -160547.542516, 0.071016, 0.008487, 0.008836],[746, -160548.706755, 0.022168, 0.000001, 0.010215]], "n":["TO_OTU25471"]},
	{"p":[[205, -160561.640550, 0.899284, 0.024386, 0.040504],[201, -160564.210408, 0.068837, 0.044323, 0.047282]], "n":["TO_OTU26430"]},
	{"p":[[358, -160555.304934, 0.660737, 0.006982, 0.029872],[359, -160557.291342, 0.090645, 0.008728, 0.038478],[360, -160557.446110, 0.077648, 0.018026, 0.037266],[362, -160557.758668, 0.056805, 0.024399, 0.039448],[361, -160557.761515, 0.056643, 0.000001, 0.039458],[337, -160558.718449, 0.021755, 0.009805, 0.039734]], "n":["TO_OTU27560"]},
	{"p":[[205, -160558.795436, 0.824042, 0.017101, 0.028622],[201, -160561.449300, 0.057995, 0.048870, 0.024780],[264, -160562.206079, 0.027210, 0.135857, 0.000001],[199, -160562.369351, 0.023111, 0.031922, 0.059428],[206, -160562.595830, 0.018427, 0.000001, 0.059515],[207, -160562.598579, 0.018377, 0.032157, 0.059527]], "n":["TO_OTU27983"]},
	{"p":[[44, -160598.313662, 0.646327, 0.066225, 0.247779],[792, -160600.587826, 0.066496, 0.053906, 0.364581],[793, -160600.885633, 0.049370, 0.048216, 0.339875],[794, -160600.890473, 0.049131, 0.060074, 0.362659],[791, -160601.587321, 0.024475, 0.000001, 0.365291],[795, -160601.591870, 0.024364, 0.061803, 0.365321],[788, -160601.864769, 0.018545, 0.016016, 0.357924]], "n":["TO_OTU28288"]},
	{"p":[[205, -160564.559788, 0.281638, 0.013986, 0.064288],[201, -160564.581409, 0.275614, 0.024842, 0.059420],[202, -160565.560427, 0.103543, 0.015348, 0.084560],[200, -160565.567112, 0.102853, 0.021354, 0.084609],[204, -160565.609726, 0.098562, 0.008103, 0.085649],[203, -160565.609754, 0.098559, 0.000001, 0.085648],[206, -160566.925868, 0.026431, 0.012001, 0.087507]], "n":["TO_OTU28698"]},
	{"p":[[205, -160557.721223, 0.841094, 0.022635, 0.041574],[199, -160561.195234, 0.026068, 0.023974, 0.074764],[201, -160561.234889, 0.025054, 0.034536, 0.053853],[206, -160561.259087, 0.024455, 0.000001, 0.073839],[207, -160561.262116, 0.024381, 0.032157, 0.073858],[198, -160561.909918, 0.012756, 0.000001, 0.072354],[208, -160561.910895, 0.012744, 0.064409, 0.071950]], "n":["TO_OTU29446"]},
	{"p":[[201, -160564.674332, 0.214026, 0.018581, 0.058393],[205, -160565.152388, 0.132694, 0.009836, 0.056269],[202, -160565.232730, 0.122450, 0.012762, 0.074157],[203, -160565.245465, 0.120900, 0.000001, 0.074585],[204, -160565.245561, 0.120889, 0.008103, 0.074587],[200, -160565.255169, 0.119733, 0.021129, 0.074422],[56, -160565.777001, 0.071053, 0.018735, 0.069323]], "n":["TO_OTU31052"]},
	{"p":[[205, -160557.095784, 0.864792, 0.024328, 0.039248],[201, -160559.185607, 0.106983, 0.050748, 0.035477]], "n":["TO_OTU31008"]},
	{"p":[[130, -160564.510417, 0.950495, 0.012175, 0.051789],[105, -160567.897565, 0.032131, 0.039648, 0.069622]], "n":["TO_OTU31070"]},
	{"p":[[50, -160572.962756, 0.999484, 0.053586, 0.068619]], "n":["TO_OTU31568"]},
	{"p":[[358, -160556.514439, 0.630918, 0.011823, 0.039088],[359, -160559.304578, 0.038746, 0.000001, 0.048302],[360, -160559.339801, 0.037405, 0.015765, 0.048571],[362, -160559.496667, 0.031975, 0.024398, 0.050051],[361, -160559.497992, 0.031932, 0.000001, 0.050059],[306, -160560.423847, 0.012651, 0.013189, 0.040369],[350, -160560.535282, 0.011317, 0.003234, 0.052759]], "n":["TO_OTU31762"]},
	{"p":[[760, -160562.843757, 0.442331, 0.011956, 0.054480],[762, -160564.529056, 0.082003, 0.158525, 0.052590],[761, -160564.878057, 0.057844, 0.000001, 0.068432],[738, -160564.889381, 0.057193, 0.001935, 0.068655],[747, -160565.034307, 0.049477, 0.000001, 0.070656],[748, -160565.035289, 0.049428, 0.003650, 0.070683],[742, -160565.038102, 0.049290, 0.000001, 0.070693]], "n":["TO_OTU31999"]},
	{"p":[[281, -160544.594304, 0.999994, 0.047481, 0.000001]], "n":["TO_OTU34125"]},
	{"p":[[754, -160549.945135, 0.474800, 0.004754, 0.021746],[752, -160551.759939, 0.077331, 0.000001, 0.029710],[753, -160551.809767, 0.073572, 0.000001, 0.030166],[757, -160552.261738, 0.046819, 0.004854, 0.032441],[758, -160552.262220, 0.046796, 0.001070, 0.032467],[759, -160552.262230, 0.046796, 0.000844, 0.032467],[751, -160552.262394, 0.046788, 0.000001, 0.032462]], "n":["TO_OTU34988"]},
	{"p":[[203, -160546.604415, 0.998907, 0.033735, 0.022630]], "n":["TO_OTU36379"]},
	{"p":[[205, -160559.060806, 0.885998, 0.019914, 0.034100],[201, -160561.967820, 0.048410, 0.029805, 0.045701],[202, -160563.129625, 0.015148, 0.013537, 0.070297],[203, -160563.153862, 0.014786, 0.000001, 0.070849],[204, -160563.154121, 0.014782, 0.008103, 0.070855],[200, -160563.156379, 0.014748, 0.019416, 0.070550]], "n":["TO_OTU37555"]},
	{"p":[[205, -160552.926847, 0.965188, 0.022876, 0.019974],[201, -160557.266897, 0.012582, 0.036696, 0.034491]], "n":["TO_OTU38337"]},
	{"p":[[359, -160553.600641, 0.132949, 0.000001, 0.029705],[362, -160553.604539, 0.132432, 0.024398, 0.029610],[358, -160553.605471, 0.132309, 0.000001, 0.029718],[361, -160553.606436, 0.132181, 0.000001, 0.029616],[360, -160553.606758, 0.132138, 0.009021, 0.029581],[350, -160554.700479, 0.044262, 0.004490, 0.030882],[351, -160555.070868, 0.030561, 0.000001, 0.036645]], "n":["TO_OTU39241"]},
	{"p":[[739, -160563.107564, 0.964658, 0.012001, 0.052847],[740, -160567.314206, 0.014370, 0.000001, 0.066003],[741, -160567.329287, 0.014155, 0.010821, 0.066172]], "n":["TO_OTU39577"]},
	{"p":[[741, -160550.997989, 0.301190, 0.005299, 0.021200],[740, -160552.279487, 0.083617, 0.008156, 0.030955],[742, -160552.282336, 0.083379, 0.005274, 0.030493],[747, -160552.375402, 0.075969, 0.000001, 0.030738],[748, -160552.380713, 0.075567, 0.003651, 0.030770],[738, -160552.384705, 0.075266, 0.008210, 0.029610],[762, -160552.415701, 0.072969, 0.178149, 0.029860]], "n":["TO_OTU39507"]},
	{"p":[[819, -160547.189482, 0.999776, 0.090287, 0.000001]], "n":["TO_OTU40191"]},
	{"p":[[760, -160559.310846, 0.686150, 0.013972, 0.043602],[750, -160561.179379, 0.105907, 0.007448, 0.055384],[754, -160562.776711, 0.021439, 0.000001, 0.067204],[755, -160562.777478, 0.021423, 0.000001, 0.067204],[756, -160562.779323, 0.021383, 0.000799, 0.067237],[759, -160562.783413, 0.021296, 0.000822, 0.067290],[757, -160562.784395, 0.021275, 0.004858, 0.067284]], "n":["TO_OTU40710"]},
	{"p":[[140, -160564.542753, 0.962366, 0.036853, 0.050778],[119, -160569.058144, 0.010528, 0.021633, 0.059513],[117, -160569.058527, 0.010524, 0.000001, 0.059529],[118, -160569.058587, 0.010523, 0.000001, 0.059523]], "n":["TO_OTU42464"]},
	{"p":[[438, -160548.582186, 0.910370, 0.026060, 0.003210],[437, -160551.745171, 0.038508, 0.000992, 0.018576],[434, -160551.786992, 0.036931, 0.000001, 0.018247]], "n":["TO_OTU43775"]},
	{"p":[[44, -160595.130306, 0.961658, 0.065461, 0.223620]], "n":["TO_OTU44125"]},
	{"p":[[105, -160548.140389, 0.859571, 0.030129, 0.007465],[107, -160551.270520, 0.037574, 0.018185, 0.013625],[106, -160551.292461, 0.036758, 0.000001, 0.013796],[130, -160551.710407, 0.024202, 0.006696, 0.018698]], "n":["TO_OTU44665"]},
	{"p":[[198, -160548.999810, 0.266943, 0.019666, 0.005773],[197, -160549.503011, 0.161391, 0.003863, 0.000544],[186, -160549.546860, 0.154467, 0.000001, 0.005515],[204, -160550.006718, 0.097527, 0.000001, 0.014656],[205, -160550.008106, 0.097391, 0.000001, 0.014655],[206, -160550.008195, 0.097383, 0.012001, 0.014664],[207, -160550.880740, 0.040695, 0.017919, 0.011552]], "n":["TO_OTU45040"]},
	{"p":[[741, -160548.369613, 0.405853, 0.005324, 0.010730],[742, -160550.112841, 0.071006, 0.005156, 0.020334],[740, -160550.119030, 0.070568, 0.008155, 0.020868],[747, -160550.202784, 0.064898, 0.000001, 0.020408],[748, -160550.209347, 0.064474, 0.003651, 0.020443],[738, -160550.255593, 0.061560, 0.007087, 0.019762],[761, -160550.274545, 0.060404, 0.000001, 0.019884]], "n":["TO_OTU45593"]},
	{"p":[[747, -160551.624532, 0.246046, 0.011184, 0.011238],[746, -160551.784923, 0.209584, 0.000001, 0.012321],[743, -160551.790961, 0.208323, 0.000001, 0.012360],[745, -160551.978470, 0.172704, 0.000001, 0.013041],[744, -160552.047724, 0.161148, 0.000001, 0.013402]], "n":["TO_OTU45721"]},
	{"p":[[793, -160560.966321, 0.467390, 0.061250, 0.034612],[794, -160561.772644, 0.208688, 0.060073, 0.053867],[792, -160561.775113, 0.208173, 0.022161, 0.055419],[791, -160563.227065, 0.048736, 0.000001, 0.057727],[795, -160563.247289, 0.047760, 0.061802, 0.057850],[796, -160564.851562, 0.009602, 0.079836, 0.056869],[790, -160564.860444, 0.009517, 0.000001, 0.056932]], "n":["TO_OTU46689"]},
	{"p":[[813, -160556.468723, 0.669790, 0.052908, 0.031362],[816, -160558.079766, 0.133743, 0.046892, 0.052276],[811, -160559.414708, 0.035198, 0.000063, 0.053440],[812, -160559.420075, 0.035009, 0.002351, 0.053432],[810, -160559.897915, 0.021710, 0.000001, 0.045086],[814, -160559.902070, 0.021620, 0.023224, 0.044995],[817, -160560.343307, 0.013907, 0.016661, 0.050237]], "n":["TO_OTU47147"]},
	{"p":[[11, -160576.264587, 0.988537, 0.122324, 0.040338]], "n":["TO_OTU49004"]},
	{"p":[[205, -160562.629792, 0.996399, 0.030180, 0.049566]], "n":["TO_OTU52097"]},
	{"p":[[12, -160604.636544, 0.171440, 0.025093, 0.321575],[16, -160604.763858, 0.150946, 0.000001, 0.273414],[23, -160604.765791, 0.150654, 0.000001, 0.273444],[24, -160604.767113, 0.150455, 0.040004, 0.273450],[18, -160605.461956, 0.075100, 0.000001, 0.321780],[17, -160605.461999, 0.075097, 0.000001, 0.321786],[19, -160605.462078, 0.075091, 0.011818, 0.321786]], "n":["TO_OTU53393"]},
	{"p":[[315, -160552.603938, 0.606121, 0.037443, 0.030596],[306, -160554.242537, 0.117740, 0.015095, 0.015949],[372, -160555.779798, 0.025310, 0.000001, 0.034558],[375, -160555.815620, 0.024420, 0.000001, 0.034933],[376, -160555.818370, 0.024353, 0.006313, 0.034952],[366, -160556.496560, 0.012360, 0.000001, 0.041835],[367, -160556.498457, 0.012336, 0.003339, 0.041802]], "n":["TO_OTU53345"]},
	{"p":[[436, -160544.670807, 0.377659, 0.008844, 0.009328],[435, -160544.938248, 0.289036, 0.000001, 0.009342],[437, -160544.955201, 0.284177, 0.004550, 0.009344],[434, -160547.391025, 0.024873, 0.000001, 0.009849],[438, -160547.416690, 0.024243, 0.039651, 0.009875]], "n":["TO_OTU53898"]},
	{"p":[[438, -160544.948204, 0.981066, 0.019299, 0.000001]], "n":["TO_OTU54931"]},
	{"p":[[390, -160596.683888, 0.728449, 0.024574, 0.247971],[392, -160599.076505, 0.066573, 0.030033, 0.270936],[391, -160599.076953, 0.066543, 0.000001, 0.270956],[46, -160599.992581, 0.026635, 0.000131, 0.230631],[901, -160600.016013, 0.026018, 0.000001, 0.231387],[902, -160600.017855, 0.025970, 0.061535, 0.231427],[25, -160600.969303, 0.010029, 0.002147, 0.258174]], "n":["TO_OTU56553"]},
	{"p":[[457, -160547.216066, 0.993945, 0.008155, 0.021165]], "n":["TO_OTU56588"]},
	{"p":[[750, -160547.071611, 0.999996, 0.027564, 0.020454]], "n":["TO_OTU58182"]},
	{"p":[[377, -160543.869397, 0.168762, 0.012710, 0.006425],[383, -160543.879227, 0.167111, 0.014450, 0.004634],[382, -160543.879292, 0.167100, 0.000001, 0.004637],[376, -160543.892187, 0.164959, 0.000001, 0.009115],[303, -160543.905143, 0.162836, 0.000001, 0.009132],[384, -160544.562521, 0.084383, 0.060188, 0.000001],[302, -160545.143434, 0.047203, 0.000001, 0.000470]], "n":["TO_OTU59208"]},
	{"p":[[747, -160550.901860, 0.229826, 0.011566, 0.022293],[746, -160550.996735, 0.209024, 0.000001, 0.023724],[743, -160551.000508, 0.208237, 0.000001, 0.023765],[745, -160551.154397, 0.178535, 0.000001, 0.024634],[744, -160551.204712, 0.169774, 0.000001, 0.024983]], "n":["TO_OTU59271"]},
	{"p":[[201, -160547.078356, 0.992074, 0.054972, 0.000001]], "n":["TO_OTU60244"]},
	{"p":[[330, -160553.717524, 0.206771, 0.013718, 0.033537],[326, -160554.509108, 0.093693, 0.007846, 0.033250],[331, -160555.137623, 0.049975, 0.016036, 0.038381],[327, -160555.141608, 0.049776, 0.000001, 0.038444],[365, -160555.658465, 0.029686, 0.000003, 0.043859],[366, -160555.669162, 0.029370, 0.005153, 0.043984],[367, -160555.705697, 0.028316, 0.003520, 0.044447]], "n":["TO_OTU61093"]},
	{"p":[[46, -160579.044285, 0.304213, 0.090986, 0.085524],[45, -160579.047992, 0.303088, 0.011261, 0.103206],[38, -160579.201332, 0.260000, 0.000001, 0.107052],[44, -160580.592300, 0.064697, 0.008647, 0.104344],[43, -160580.629400, 0.062341, 0.000001, 0.111052]], "n":["TO_OTU63382"]},
	{"p":[[205, -160558.490193, 0.755011, 0.019856, 0.034254],[201, -160559.945782, 0.176116, 0.046122, 0.030891],[202, -160562.327862, 0.016266, 0.015039, 0.069908],[200, -160562.365105, 0.015671, 0.011062, 0.069802],[203, -160562.366471, 0.015650, 0.001746, 0.070223],[204, -160562.374928, 0.015518, 0.008103, 0.070828]], "n":["TO_OTU63500"]},
	{"p":[[210, -160556.051881, 0.137052, 0.012290, 0.037073],[185, -160556.381097, 0.098607, 0.034172, 0.038627],[170, -160556.401869, 0.096580, 0.009324, 0.038775],[183, -160557.002484, 0.052972, 0.000001, 0.046502],[184, -160557.015258, 0.052299, 0.004407, 0.046697],[224, -160557.029675, 0.051551, 0.004309, 0.047146],[223, -160557.033503, 0.051354, 0.000001, 0.047149]], "n":["TO_OTU65464"]},
	{"p":[[44, -160593.210482, 0.984879, 0.068453, 0.198766]], "n":["TO_OTU65544"]},
	{"p":[[738, -160589.954076, 0.098225, 0.038441, 0.258301],[747, -160590.306878, 0.069025, 0.003692, 0.253425],[761, -160590.344905, 0.066449, 0.000001, 0.261182],[762, -160590.345842, 0.066387, 0.178149, 0.261204],[748, -160590.385186, 0.063826, 0.003651, 0.261762],[742, -160590.386429, 0.063746, 0.000001, 0.261807],[744, -160590.392121, 0.063385, 0.056180, 0.231789]], "n":["TO_OTU65748"]},
	{"p":[[119, -160565.717775, 0.245259, 0.021633, 0.059860],[117, -160565.718144, 0.245168, 0.000001, 0.059875],[118, -160565.718161, 0.245164, 0.000001, 0.059870],[140, -160566.451664, 0.117734, 0.022442, 0.061152],[141, -160569.390329, 0.006232, 0.000001, 0.079900],[142, -160569.402145, 0.006159, 0.006565, 0.080103],[138, -160569.447209, 0.005888, 0.030891, 0.080099]], "n":["TO_OTU74442"]},
	{"p":[[760, -160558.150826, 0.774103, 0.013816, 0.033666],[750, -160560.712805, 0.059724, 0.006431, 0.046305],[759, -160562.035327, 0.015914, 0.000790, 0.057796],[756, -160562.035430, 0.015912, 0.000685, 0.057796],[751, -160562.038268, 0.015867, 0.000001, 0.057816],[754, -160562.038312, 0.015867, 0.000001, 0.057815],[755, -160562.039089, 0.015854, 0.000001, 0.057816]], "n":["TO_OTU75478"]},
	{"p":[[342, -160548.335417, 0.907817, 0.028755, 0.008332],[351, -160552.018114, 0.022836, 0.026805, 0.029166],[347, -160552.064516, 0.021801, 0.000001, 0.023080],[348, -160552.103566, 0.020966, 0.016717, 0.023281]], "n":["TO_OTU79080"]},
	{"p":[[747, -160550.879484, 0.231139, 0.011461, 0.021891],[746, -160550.983542, 0.208296, 0.000001, 0.023436],[743, -160550.987393, 0.207495, 0.000001, 0.023480],[745, -160551.145669, 0.177121, 0.000001, 0.024372],[744, -160551.195305, 0.168544, 0.000001, 0.024718]], "n":["TO_OTU80454"]},
	{"p":[[210, -160541.455238, 0.720305, 0.012319, 0.000001],[224, -160544.669692, 0.028940, 0.004308, 0.009045],[223, -160544.673568, 0.028828, 0.000001, 0.009045],[184, -160544.682757, 0.028564, 0.001314, 0.009042],[183, -160544.711726, 0.027749, 0.000001, 0.009044],[170, -160544.716217, 0.027624, 0.000001, 0.009045],[211, -160544.819565, 0.024912, 0.004208, 0.007631]], "n":["TO_OTU83672"]},
	{"p":[[750, -160558.458299, 0.949554, 0.020954, 0.045507],[752, -160562.685651, 0.013855, 0.000001, 0.069907],[754, -160562.695561, 0.013718, 0.010198, 0.069953],[753, -160562.697958, 0.013685, 0.000001, 0.069965]], "n":["TO_OTU86018"]},
	{"p":[[824, -160548.183091, 0.120853, 0.034540, 0.008770],[818, -160548.226383, 0.115732, 0.000001, 0.011335],[823, -160548.231797, 0.115107, 0.000001, 0.011373],[814, -160548.825463, 0.063574, 0.000001, 0.013111],[821, -160548.829309, 0.063330, 0.000001, 0.011339],[817, -160548.829848, 0.063296, 0.000001, 0.013154],[822, -160548.830228, 0.063272, 0.002643, 0.010562]], "n":["TO_OTU85139"]},
	{"p":[[762, -160549.611555, 0.195850, 0.165932, 0.009960],[742, -160550.061216, 0.124922, 0.005465, 0.020457],[738, -160550.153109, 0.113954, 0.006092, 0.019360],[761, -160550.164235, 0.112693, 0.000001, 0.019383],[747, -160550.166123, 0.112481, 0.000001, 0.020687],[748, -160550.170701, 0.111967, 0.003649, 0.020699],[741, -160550.543072, 0.077156, 0.000001, 0.020797]], "n":["TO_OTU86626"]},
	{"p":[[205, -160567.416143, 0.900665, 0.027614, 0.063172],[201, -160570.439754, 0.043795, 0.039913, 0.077874],[203, -160571.639360, 0.013196, 0.006366, 0.106786],[204, -160571.791338, 0.011335, 0.008103, 0.112159],[202, -160571.816593, 0.011053, 0.006306, 0.112294],[200, -160571.951858, 0.009654, 0.015870, 0.113992]], "n":["TO_OTU90340"]},
	{"p":[[187, -160560.522924, 1.000000, 0.103926, 0.021867]], "n":["TO_OTU91214"]},
	{"p":[[457, -160548.165164, 0.895640, 0.006487, 0.015774],[456, -160551.449732, 0.033548, 0.005892, 0.032335],[454, -160551.449916, 0.033542, 0.000001, 0.032337],[455, -160551.454702, 0.033381, 0.002158, 0.032412]], "n":["TO_OTU97866"]},
	{"p":[[205, -160556.778385, 0.943430, 0.027107, 0.035875],[201, -160559.728807, 0.049358, 0.055074, 0.036196]], "n":["TO_OTU96946"]},
	{"p":[[205, -160555.963534, 0.900812, 0.027459, 0.034316],[201, -160558.287691, 0.088159, 0.059364, 0.026176]], "n":["TO_OTU106667"]},
	{"p":[[188, -160548.436823, 0.635907, 0.059202, 0.021512],[193, -160549.776647, 0.166539, 0.000001, 0.021576],[194, -160549.787095, 0.164808, 0.031570, 0.021590],[192, -160552.099600, 0.016318, 0.000001, 0.025209],[189, -160552.104080, 0.016245, 0.000001, 0.025240]], "n":["TO_OTU106120"]},
	{"p":[[741, -160555.176800, 0.239901, 0.005273, 0.032991],[740, -160556.128956, 0.092580, 0.008154, 0.042664],[742, -160556.142375, 0.091346, 0.005179, 0.042300],[747, -160556.228614, 0.083798, 0.000001, 0.042623],[748, -160556.233023, 0.083430, 0.003649, 0.042653],[738, -160556.270592, 0.080353, 0.008899, 0.041899],[761, -160556.301691, 0.077893, 0.000001, 0.042123]], "n":["TO_OTU109943"]},
	{"p":[[390, -160600.068284, 0.396243, 0.041740, 0.356202],[867, -160601.835311, 0.067694, 0.014978, 0.370962],[862, -160602.174329, 0.048230, 0.007667, 0.375620],[861, -160602.207336, 0.046664, 0.004432, 0.382088],[860, -160602.211889, 0.046452, 0.001447, 0.382269],[863, -160602.320967, 0.041652, 0.003898, 0.381263],[864, -160602.328295, 0.041348, 0.010346, 0.381410]], "n":["TO_OTU114467"]},
	{"p":[[205, -160555.979192, 0.988131, 0.025991, 0.032226]], "n":["TO_OTU120290"]},
	{"p":[[752, -160557.177414, 0.333467, 0.000001, 0.031387],[754, -160557.189415, 0.329489, 0.010197, 0.031406],[753, -160557.191771, 0.328713, 0.000001, 0.031411]], "n":["TO_OTU119026"]},
	{"p":[[382, -160541.572952, 0.246810, 0.000001, 0.000001],[383, -160541.573929, 0.246569, 0.014450, 0.000001],[377, -160541.576951, 0.245825, 0.001042, 0.000001],[376, -160542.482558, 0.099386, 0.000001, 0.000002],[303, -160542.649162, 0.084134, 0.000001, 0.000001],[384, -160543.777050, 0.027235, 0.073169, 0.000001],[302, -160543.804034, 0.026510, 0.000001, 0.000001]], "n":["TO_OTU121356"]},
	{"p":[[747, -160546.304222, 0.514416, 0.008108, 0.010104],[746, -160547.533434, 0.150479, 0.000001, 0.012500],[743, -160547.581631, 0.143398, 0.000001, 0.012856],[745, -160548.367786, 0.065331, 0.000001, 0.017961],[744, -160548.385947, 0.064155, 0.002486, 0.016654],[748, -160550.043301, 0.012231, 0.003651, 0.017607],[742, -160550.075527, 0.011843, 0.000001, 0.017987]], "n":["TO_OTU121442"]},
	{"p":[[210, -160550.284073, 0.217004, 0.012755, 0.017085],[170, -160550.712820, 0.141340, 0.010258, 0.018687],[185, -160550.806275, 0.128730, 0.032057, 0.018407],[209, -160551.751577, 0.050020, 0.014547, 0.021089],[183, -160551.765916, 0.049307, 0.000001, 0.026713],[184, -160551.777954, 0.048717, 0.005766, 0.026820],[224, -160551.828411, 0.046320, 0.004308, 0.027667]], "n":["TO_OTU125751"]},
	{"p":[[119, -160566.112228, 0.258907, 0.021633, 0.048281],[118, -160566.112842, 0.258748, 0.000001, 0.048289],[117, -160566.112900, 0.258733, 0.000001, 0.048294],[140, -160566.880712, 0.120059, 0.022532, 0.049239],[141, -160570.131607, 0.004651, 0.000001, 0.067377],[142, -160570.139688, 0.004614, 0.007356, 0.067504],[143, -160570.207939, 0.004309, 0.020631, 0.068578]], "n":["TO_OTU133298"]},
	{"p":[[806, -160558.875498, 0.444834, 0.093346, 0.000623],[819, -160559.180494, 0.327899, 0.065832, 0.030652],[827, -160560.805473, 0.064568, 0.071730, 0.021827],[825, -160561.234747, 0.042033, 0.000001, 0.044488],[826, -160561.238051, 0.041894, 0.017049, 0.044604],[805, -160561.485070, 0.032725, 0.004309, 0.043662],[807, -160562.366358, 0.013556, 0.031916, 0.043842]], "n":["TO_OTU138456"]},
	{"p":[[747, -160576.082945, 0.139595, 0.000001, 0.065320],[748, -160576.083847, 0.139469, 0.003648, 0.065344],[742, -160576.086757, 0.139063, 0.000001, 0.065351],[761, -160576.430624, 0.098599, 0.010225, 0.065619],[741, -160576.433735, 0.098293, 0.000001, 0.065720],[760, -160576.440979, 0.097583, 0.000001, 0.065675],[749, -160576.448068, 0.096894, 0.004608, 0.065699]], "n":["TO_OTU136678"]},
	{"p":[[741, -160548.198482, 0.444410, 0.005238, 0.010745],[747, -160550.011032, 0.072544, 0.000001, 0.020453],[748, -160550.011894, 0.072482, 0.003651, 0.020446],[742, -160550.015393, 0.072229, 0.000001, 0.020447],[749, -160550.153619, 0.062904, 0.010279, 0.018075],[761, -160550.365553, 0.050890, 0.012212, 0.020238],[760, -160550.368127, 0.050760, 0.000001, 0.020294]], "n":["TO_OTU137199"]},
	{"p":[[745, -160544.003532, 0.205057, 0.000001, 0.010069],[744, -160544.009905, 0.203754, 0.000001, 0.010072],[746, -160544.012512, 0.203224, 0.004586, 0.010070],[743, -160544.058560, 0.194078, 0.000001, 0.010005],[747, -160544.061377, 0.193532, 0.013637, 0.010004]], "n":["TO_OTU136572"]},
	{"p":[[6, -160592.765250, 0.982137, 0.139347, 0.104635]], "n":["TO_OTU145590"]},
	{"p":[[742, -160575.033470, 0.136269, 0.004942, 0.066457],[747, -160575.105545, 0.126793, 0.000001, 0.066920],[748, -160575.108239, 0.126452, 0.003648, 0.066951],[738, -160575.202502, 0.115077, 0.009760, 0.067004],[761, -160575.218589, 0.113240, 0.000001, 0.066954],[762, -160575.219400, 0.113149, 0.178147, 0.066957],[741, -160575.458445, 0.089091, 0.000001, 0.067353]], "n":["TO_OTU141898"]},
	{"p":[[351, -160557.175187, 0.477504, 0.026804, 0.040191],[352, -160559.232541, 0.061021, 0.011090, 0.047854],[350, -160559.233328, 0.060973, 0.000001, 0.047877],[349, -160559.418340, 0.050674, 0.001447, 0.049611],[356, -160559.424323, 0.050372, 0.007541, 0.050627],[355, -160559.425039, 0.050336, 0.003324, 0.050653],[354, -160559.425549, 0.050310, 0.001242, 0.050638]], "n":["TO_OTU143442"]},
	{"p":[[353, -160564.098927, 0.165501, 0.023741, 0.042420],[349, -160564.712961, 0.089563, 0.001353, 0.049033],[355, -160564.719459, 0.088983, 0.003322, 0.050000],[354, -160564.720121, 0.088924, 0.001049, 0.049994],[356, -160564.720543, 0.088887, 0.007544, 0.049993],[357, -160564.721968, 0.088760, 0.010828, 0.050024],[352, -160564.747230, 0.086546, 0.002033, 0.050005]], "n":["TO_OTU147856"]},
	{"p":[[438, -160565.500194, 0.429289, 0.015269, 0.073743],[463, -160566.340646, 0.185245, 0.000001, 0.079958],[464, -160566.421003, 0.170942, 0.105525, 0.080885],[433, -160567.788013, 0.043568, 0.015850, 0.093103],[437, -160568.091457, 0.032165, 0.000001, 0.093619],[434, -160568.092345, 0.032136, 0.000001, 0.093660],[454, -160568.247452, 0.027519, 0.005874, 0.094341]], "n":["TO_OTU149575"]},
	{"p":[[187, -160581.043102, 0.999994, 0.120934, 0.081951]], "n":["TO_OTU160549"]},
	{"p":[[819, -160555.620160, 0.991289, 0.084592, 0.014738]], "n":["TO_OTU167042"]},
	{"p":[[891, -160603.964964, 0.120959, 0.111531, 0.297828],[786, -160604.299918, 0.086531, 0.114143, 0.314324],[800, -160604.560099, 0.066708, 0.027995, 0.358139],[827, -160604.569978, 0.066052, 0.000001, 0.361962],[828, -160604.574952, 0.065724, 0.068955, 0.362177],[42, -160604.805771, 0.052177, 0.013502, 0.329113],[41, -160604.880980, 0.048397, 0.006907, 0.331098]], "n":["TO_OTU178536"]},
	{"p":[[816, -160565.745908, 0.135428, 0.000001, 0.069935],[817, -160565.746931, 0.135289, 0.024140, 0.069934],[815, -160565.746968, 0.135284, 0.000001, 0.069936],[813, -160565.981098, 0.107045, 0.009133, 0.063664],[810, -160566.074229, 0.097526, 0.000001, 0.067202],[814, -160566.089015, 0.096094, 0.020376, 0.067494],[818, -160566.208018, 0.085313, 0.016039, 0.070319]], "n":["TO_OTU181287"]},
	{"p":[[754, -160561.786740, 0.264434, 0.004898, 0.071033],[752, -160562.801879, 0.095818, 0.000001, 0.080715],[753, -160562.824620, 0.093664, 0.000001, 0.080962],[757, -160563.140227, 0.068313, 0.004853, 0.082204],[759, -160563.140943, 0.068264, 0.000843, 0.082232],[758, -160563.140966, 0.068263, 0.001070, 0.082232],[756, -160563.141265, 0.068242, 0.000739, 0.082231]], "n":["TO_OTU180994"]},
	{"p":[[201, -160552.325977, 0.992784, 0.078036, 0.000001]], "n":["TO_OTU182042"]},
	{"p":[[362, -160571.720675, 0.170647, 0.005935, 0.066604],[363, -160572.159875, 0.109991, 0.004784, 0.074016],[357, -160572.159877, 0.109990, 0.000001, 0.074015],[364, -160572.268388, 0.098680, 0.006495, 0.074495],[334, -160572.268422, 0.098677, 0.000001, 0.074497],[332, -160573.630883, 0.025264, 0.000001, 0.074569],[333, -160573.649733, 0.024792, 0.000001, 0.074677]], "n":["TO_OTU189035"]},
	{"p":[[201, -160558.755764, 0.689054, 0.048106, 0.036694],[205, -160561.011519, 0.072209, 0.012269, 0.056581],[202, -160561.310151, 0.053567, 0.016602, 0.074817],[200, -160561.334808, 0.052262, 0.018134, 0.075103],[203, -160561.384652, 0.049721, 0.000001, 0.076128],[204, -160561.384743, 0.049717, 0.008103, 0.076130],[206, -160562.578791, 0.015064, 0.012001, 0.075812]], "n":["TO_OTU200090"]},
	{"p":[[205, -160555.762278, 0.952636, 0.026827, 0.032535],[201, -160559.078405, 0.034574, 0.048410, 0.036750]], "n":["TO_OTU187791"]},
	{"p":[[753, -160558.422604, 0.538855, 0.019403, 0.010788],[752, -160559.278254, 0.229017, 0.000001, 0.031370],[754, -160559.290380, 0.226257, 0.010197, 0.031390]], "n":["TO_OTU198795"]},
	{"p":[[208, -160567.216081, 0.149236, 0.065365, 0.115154],[207, -160567.216363, 0.149194, 0.000001, 0.115145],[198, -160567.220998, 0.148504, 0.004562, 0.112999],[197, -160567.273198, 0.140951, 0.009806, 0.098695],[186, -160567.734570, 0.088858, 0.000001, 0.107793],[199, -160568.115358, 0.060719, 0.024277, 0.126699],[206, -160568.191060, 0.056292, 0.000001, 0.125966]], "n":["TO_OTU209392"]},
	{"p":[[205, -160555.131967, 0.971040, 0.021395, 0.024795],[201, -160559.133163, 0.017764, 0.038090, 0.035955]], "n":["TO_OTU209163"]},
	{"p":[[205, -160563.074235, 0.902681, 0.024390, 0.040347],[201, -160565.694149, 0.065723, 0.043658, 0.047969]], "n":["TO_OTU208398"]},
	{"p":[[187, -160579.977988, 0.999934, 0.116144, 0.078120]], "n":["TO_OTU222281"]},
	{"p":[[760, -160568.356577, 0.641270, 0.014049, 0.055400],[762, -160570.984532, 0.046316, 0.150895, 0.057770],[759, -160571.431373, 0.029626, 0.000830, 0.079514],[756, -160571.431693, 0.029617, 0.000724, 0.079514],[758, -160571.432278, 0.029599, 0.001070, 0.079526],[754, -160571.432820, 0.029583, 0.000001, 0.079527],[750, -160571.432883, 0.029581, 0.000001, 0.079527]], "n":["TO_OTU236569"]},
	{"p":[[406, -160584.370993, 0.822020, 0.149449, 0.979266]], "n":["DOS_OTU1990"]}
	],
	metadata: {"invocation": "raxmlHPC-PTHREADS -f v -s papara_alignment.Platy_final_placement_aliview.fasta -m GTRGAMMA -t RAxML_bipartitionsBranchLabels.RT.nwk -n Platy_EPA_fastanotrim -T 10 ", "raxml_version": "8.2.10"},
	version: 2,
	fields: [
	edge_num, "likelihood", "like_weight_ratio", "distal_length",
	pendant_length
	]
}
